# Supplementary material
Source: MDPI journal article supplement (https://www.mdpi.com/1424-8247/15/3/376)
Supplement: s1 [file s1]

# Supplementary material

## One-pot synthesis and molecular modeling studies of new bioactive spiro-oxindoles based on uracil derivatives as SARS-CoV-2 inhibitors targeting RNA polymerase and spike glycoprotein

Samar A. El-Kalyoubi<sup>1</sup>, Ahmed Ragab<sup>2,\*</sup>, Ola A. Abu Ali<sup>3</sup>, Yousry A. Ammar<sup>2</sup>, Mohamed G. Seadawy<sup>4</sup>, Aya Ahmed<sup>5</sup>, and Eman A. Fayed<sup>1,\*</sup>

<sup>1</sup> Pharmaceutical Organic Chemistry Department, Faculty of Pharmacy (Girls), Al-Azhar University, Cairo 11754, Egypt; s.elkalyoubi@gmail.com; alfayed\_e@azhar.edu.eg & alfayed\_e@yahoo.com

<sup>2</sup> Chemistry Department, Faculty of Science (Boys), Al-Azhar University, Cairo 11884, Egypt; ahmed\_ragab7@ymail.com & ahmed\_ragab@azhar.edu.eg; yossry@yahoo.com

<sup>3</sup> Department of Chemistry, College of Science, Taif University, P.O. Box 11099, Taif 21944, Saudi Arabia;

<sup>4</sup> Main Chemical Laboratories, Egypt Army; Biologist202054@yahoo.com

<sup>5</sup> Molecular Virology and Immunology Unit, Cancer Institute, Cairo University, Kasr Al-Ainist., Fom El-Khaleeg, Cairo 11976, Egypt; ayaah2223@yahoo.com

---

✉ Corresponding author: Ahmed Ragab (Ph.D) Tel.: + 202 01009341359; E-mail: ahmed\_ragab7@ymail.com & ahmed\_ragab@azhar.edu.eg ; Eman A. Fayed (PhD); alfayed\_e@azhar.edu.eg & alfayed\_e@yahoo.com; and Yousry A. Ammar (PhD); yossry@yahoo.com and yossry@azhar.edu.eg

---

**% of viability for Chloroquine**

| <b>conc<br/>μM/mL</b> | <b>% viability</b> | <b>% viability</b> | <b>% viability</b> |          |          |
|-----------------------|--------------------|--------------------|--------------------|----------|----------|
| 15                    | 5.597655           | 6.297361           | 4.897948           | 16.79296 | 5.597655 |
| 7.5                   | 4.198241           | 4.198241           | 4.198241           | 12.59472 | 4.198241 |
| 3.75                  | 3.498534           | 3.498534           | 4.897948           | 11.89502 | 3.965005 |
| 1.875                 | 2.798827           | 4.897948           | 3.498534           | 11.19531 | 3.73177  |
| 0.937                 | 3.498534           | 5.597655           | 4.897948           | 13.99414 | 4.664712 |
| 0.468                 | 19.59179           | 18.89208           | 23.79003           | 62.2739  | 20.75797 |
| 0.234                 | 30.08739           | 33.58593           | 39.18358           | 102.8569 | 34.28563 |
| 0.117                 | 81.16599           | 82.56541           | 93.76071           | 257.4921 | 85.8307  |
| 0.0585                | 100                | 100                | 100                | 300      | 100      |
| 0.029                 | 100                | 100                | 100                | 300      | 100      |

D-samar-sispy 4 -1H  
D-samar-sispy 4 -1H

11.713

11.063

10.866

9.721

7.666

7.661

7.645

7.640

7.521

7.500

7.166

7.161

3.454

3.343

3.329

3.034

3.028

3.018

3.012

2.500

1.563

1.547

1.540

1.530

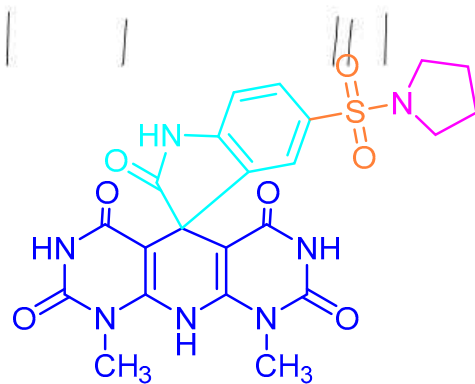

(3a)

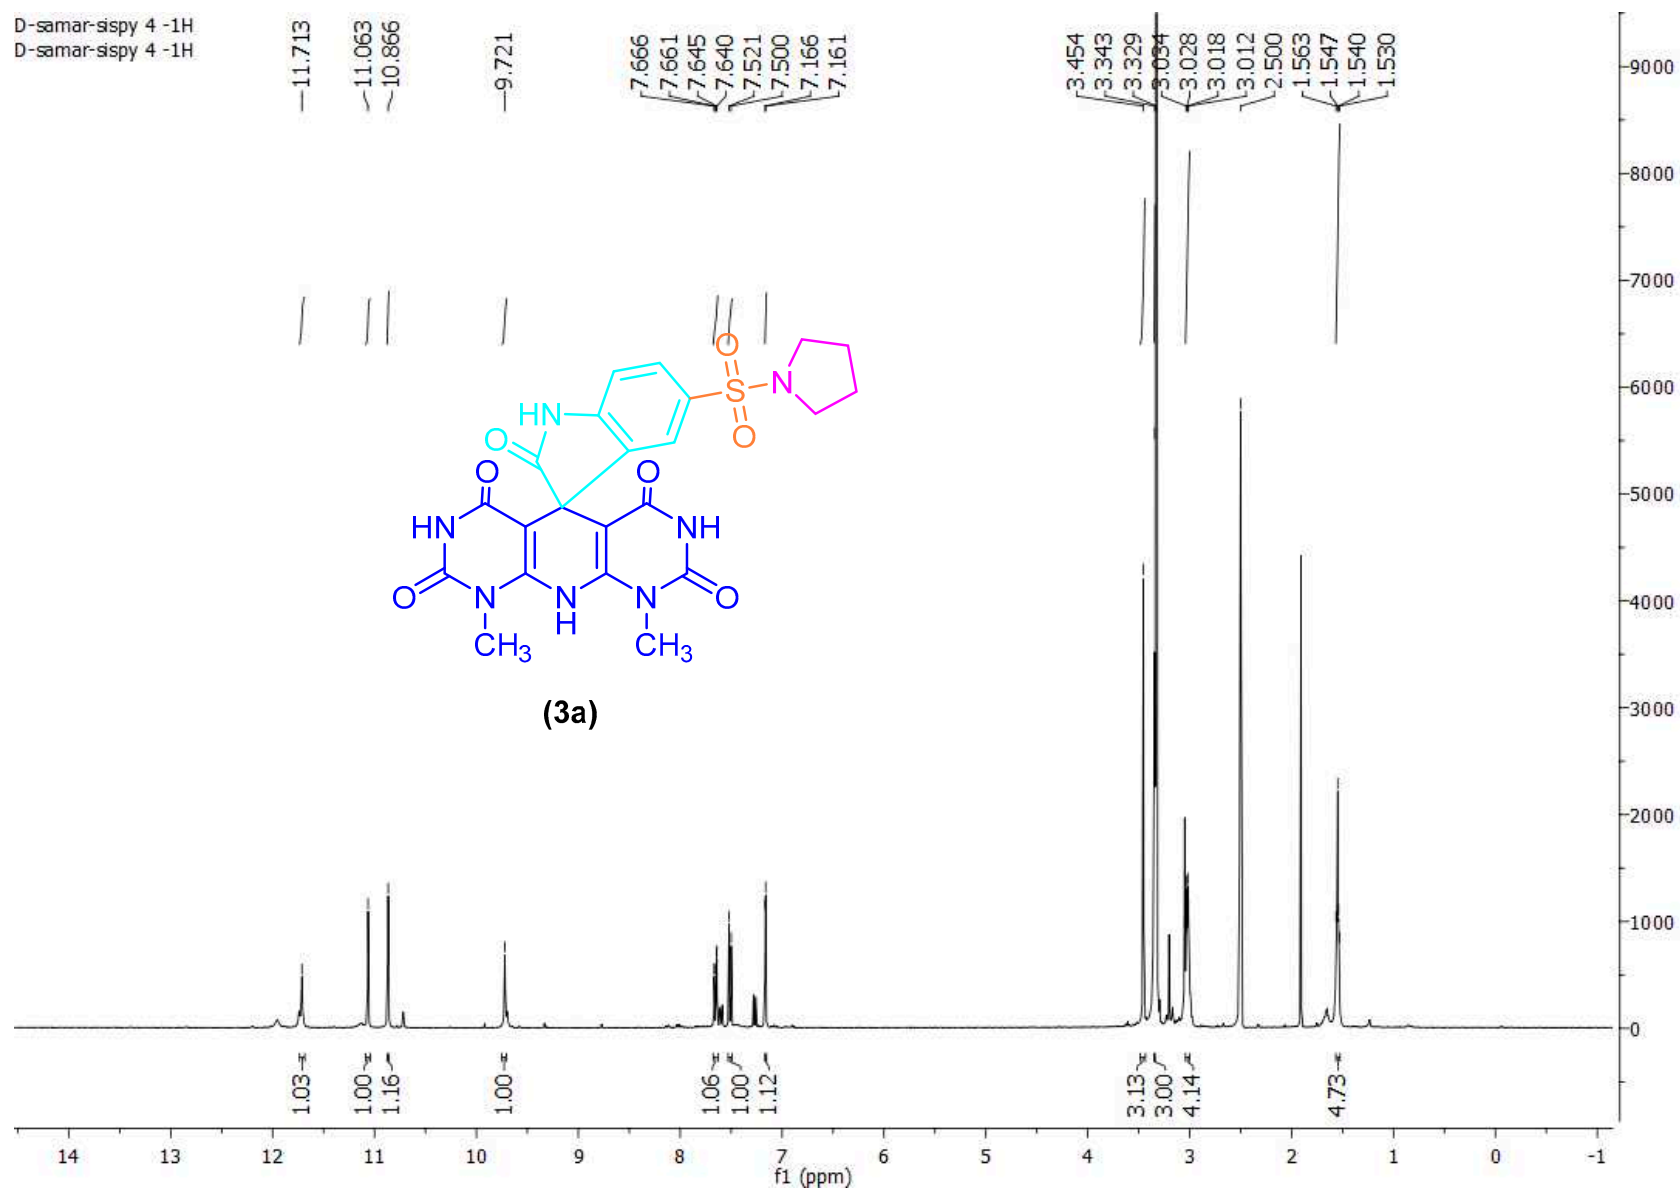

D-samar-sispy4-c13  
D-samar-sispy4-c13

—181.11 —172.03 —160.49 —157.64 —150.69 —149.91 —146.78 —139.68 —130.58 —127.49 —125.06 —121.68 —117.60 —97.95 —83.76 —50.23 —47.86 —30.34 —29.27 —24.56

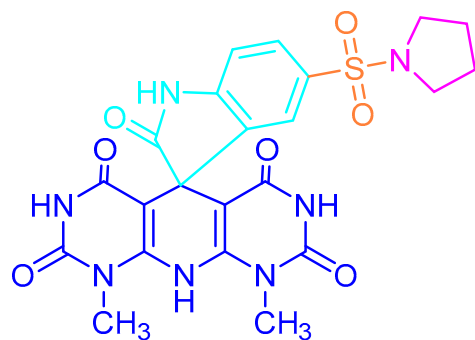

(3a)

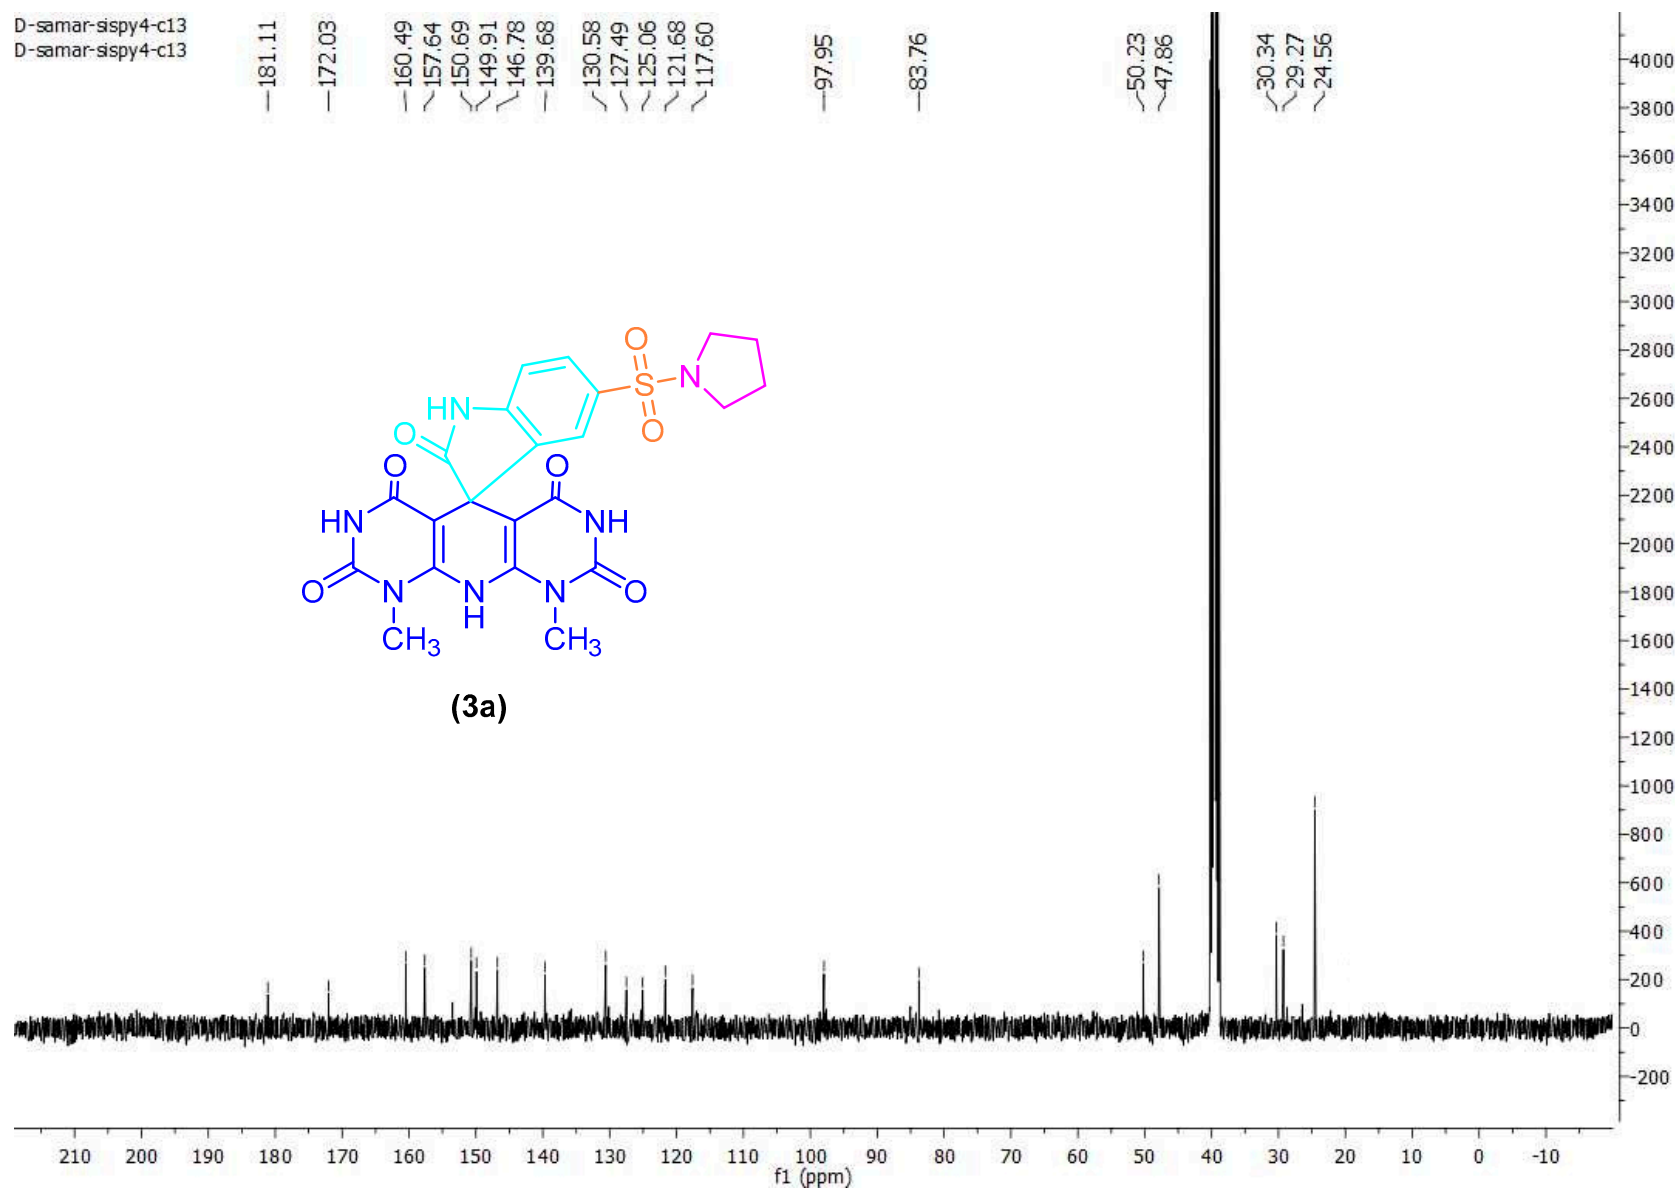



samar-Elkaliopy-sispy4 #235 RT: 3.95 AV: 1 SB: 2 4.45, 4.45 NL: 268E2  
T: {0,0} +c EI Full ms [40.00-1000.00]

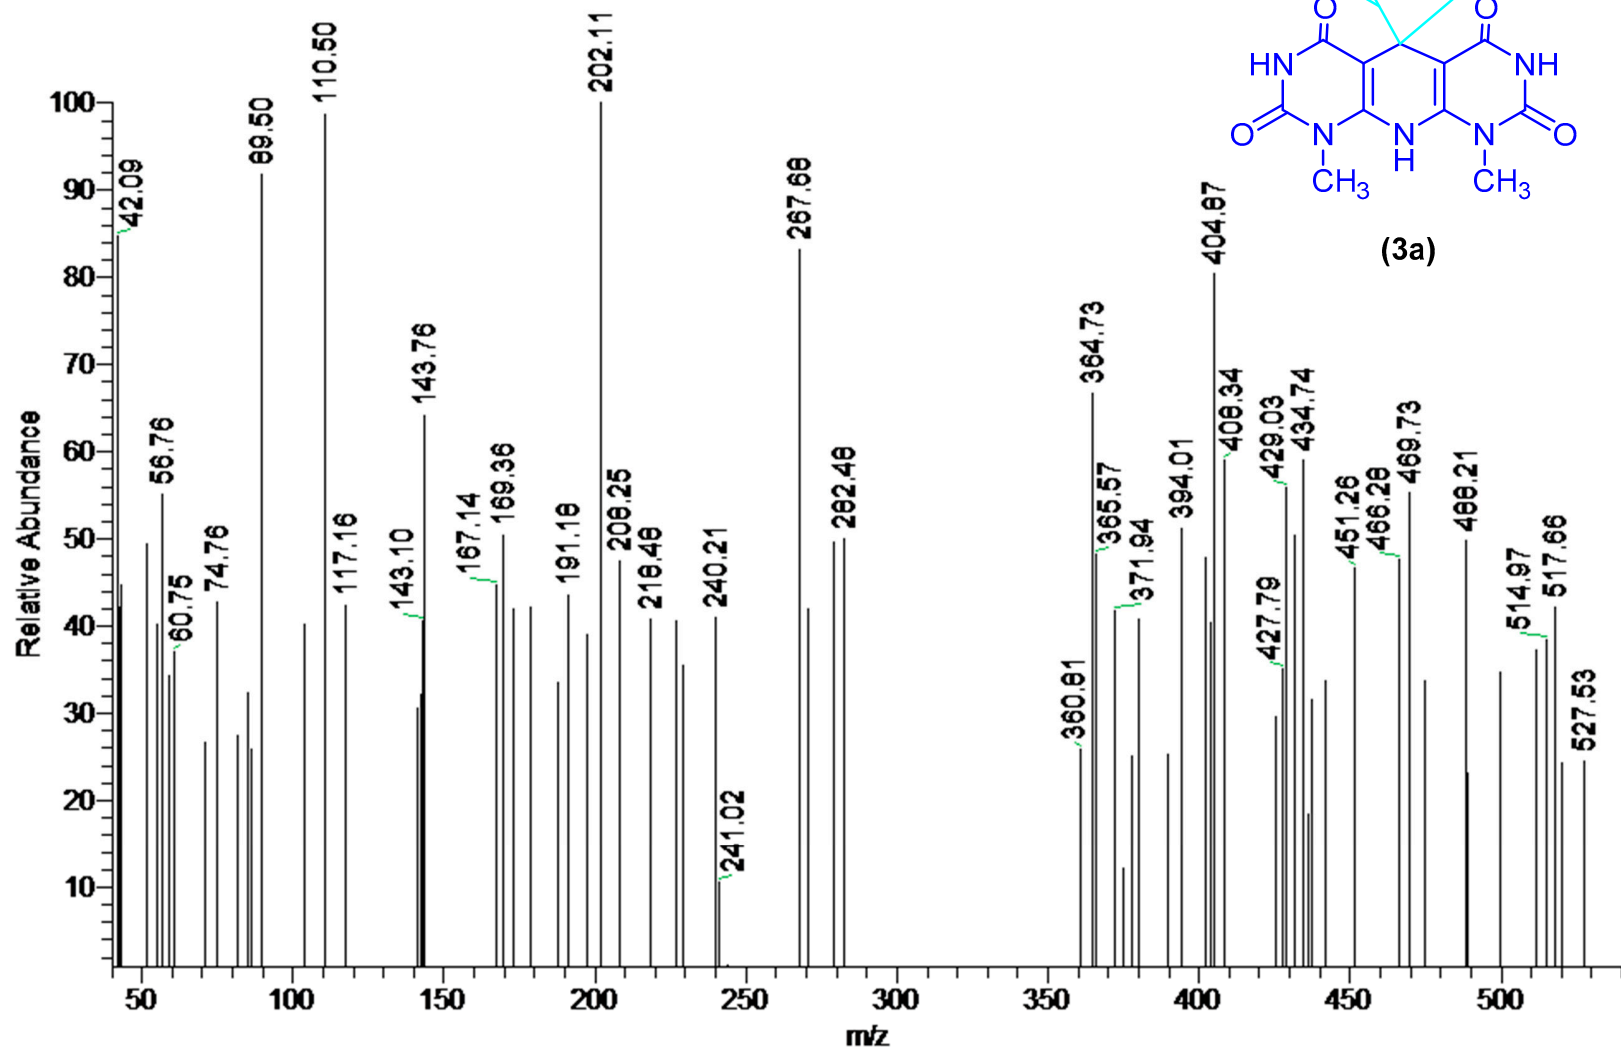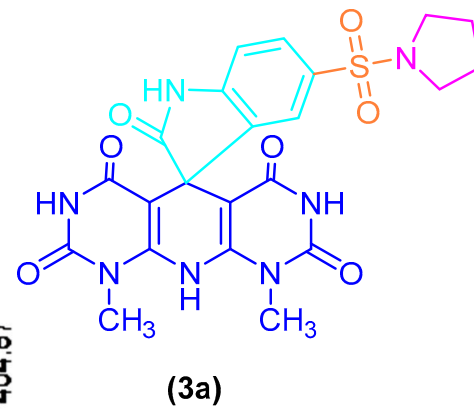

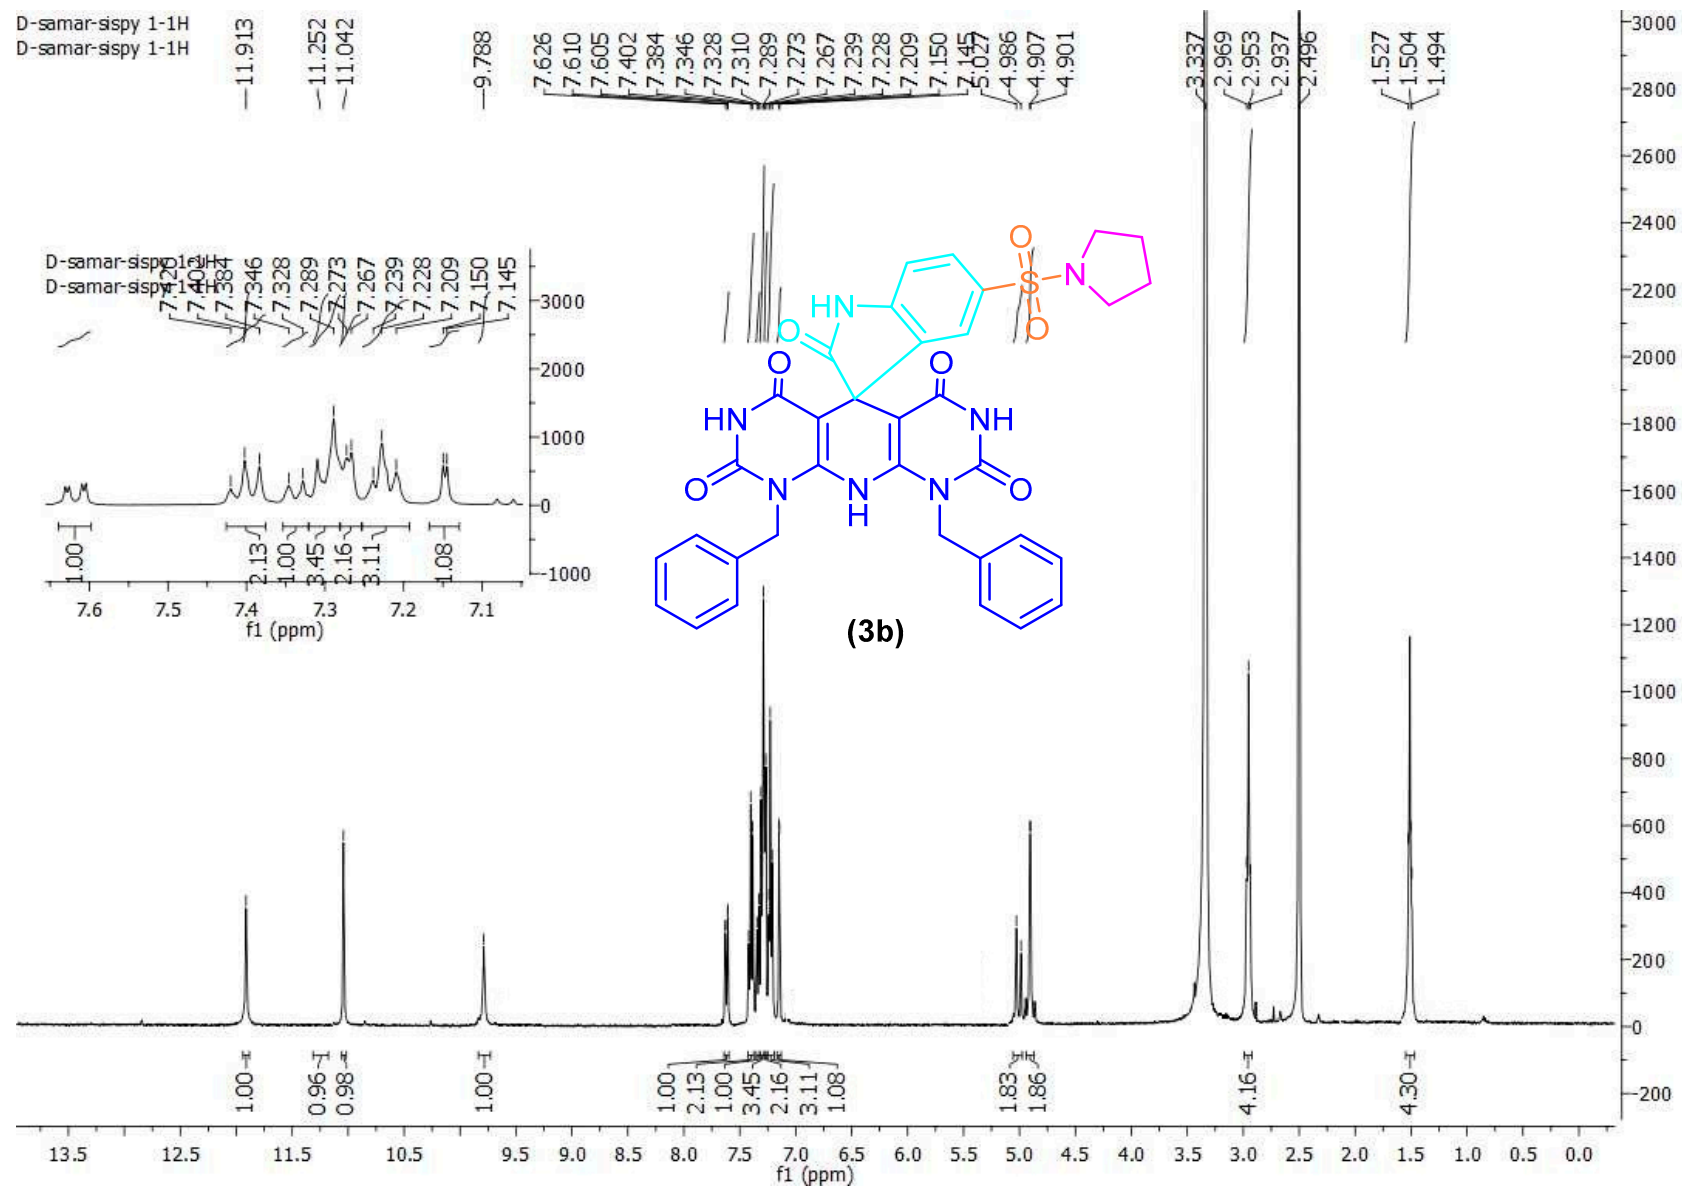

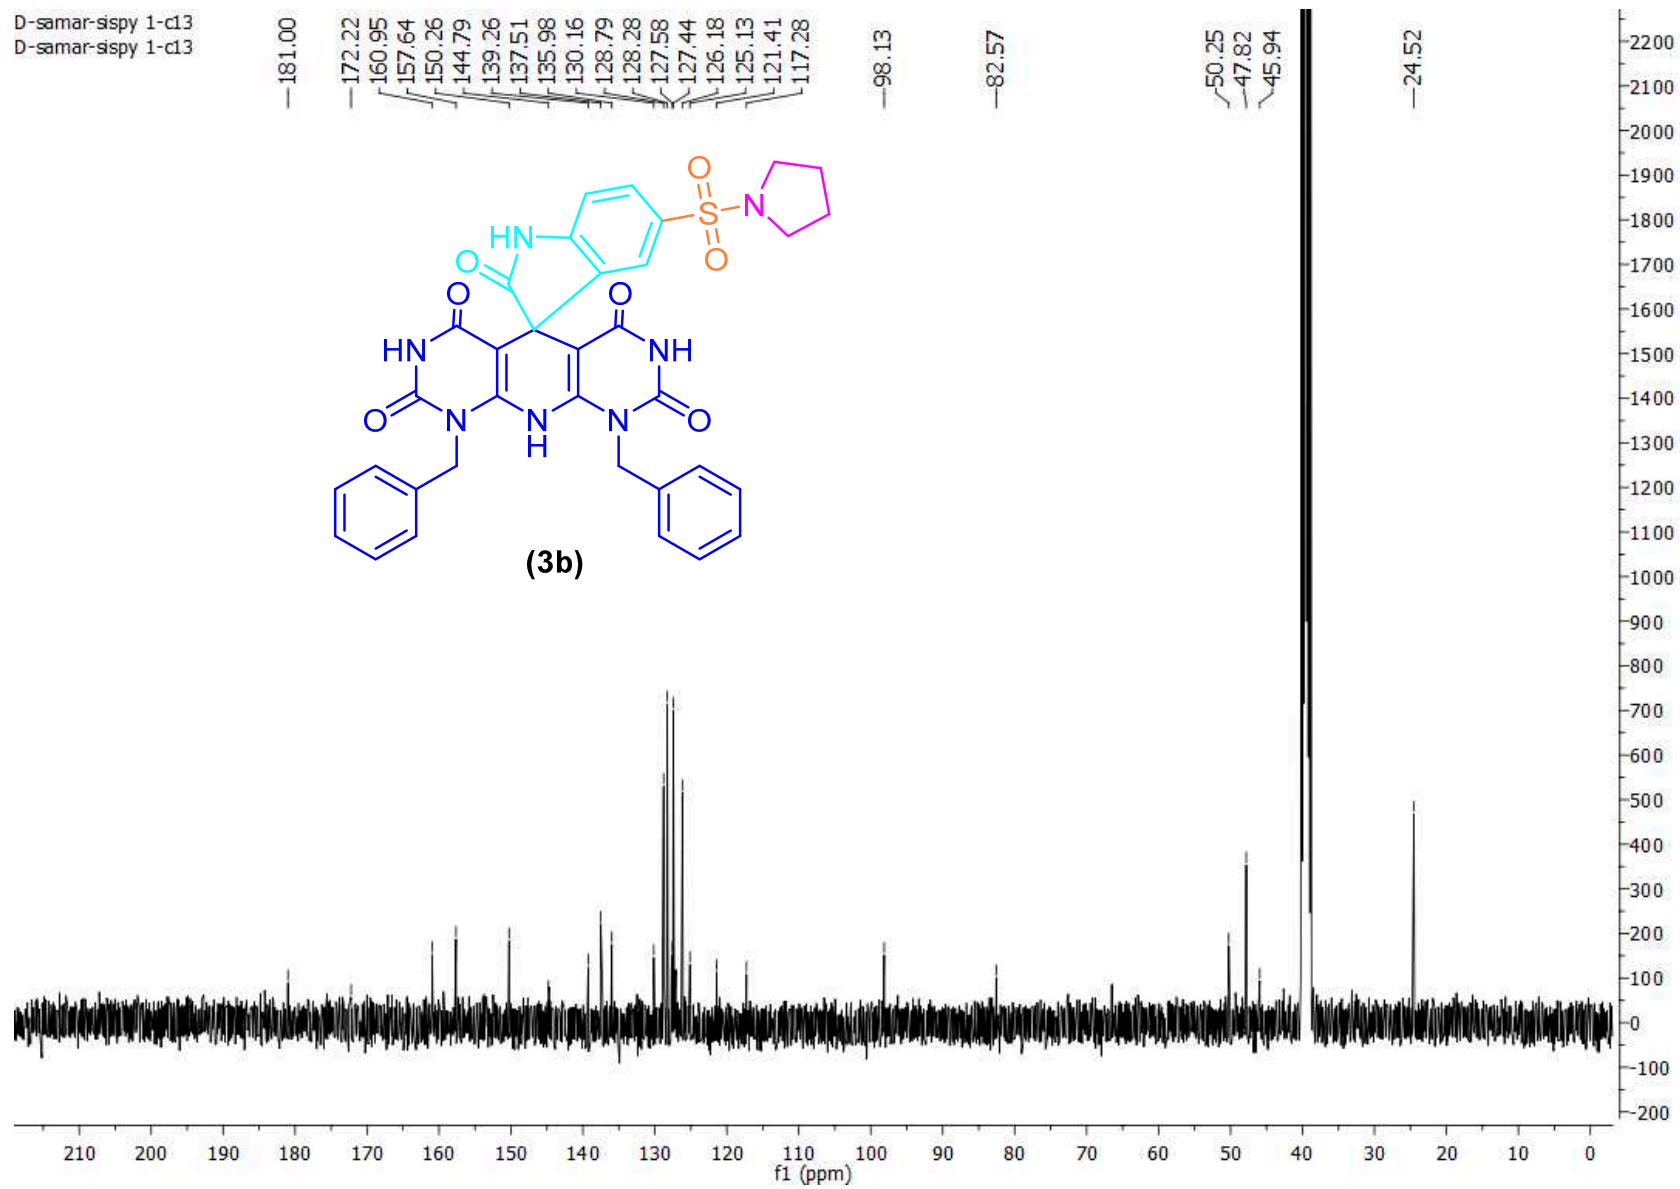

samar-Elkaliopy-sispy1 #237 RT: 3.98 AV: 1 SB: 2 4.45, 4.45 NL: 4.29E2  
T: {0,0} + c EI Full ms [40.00-1000.00]

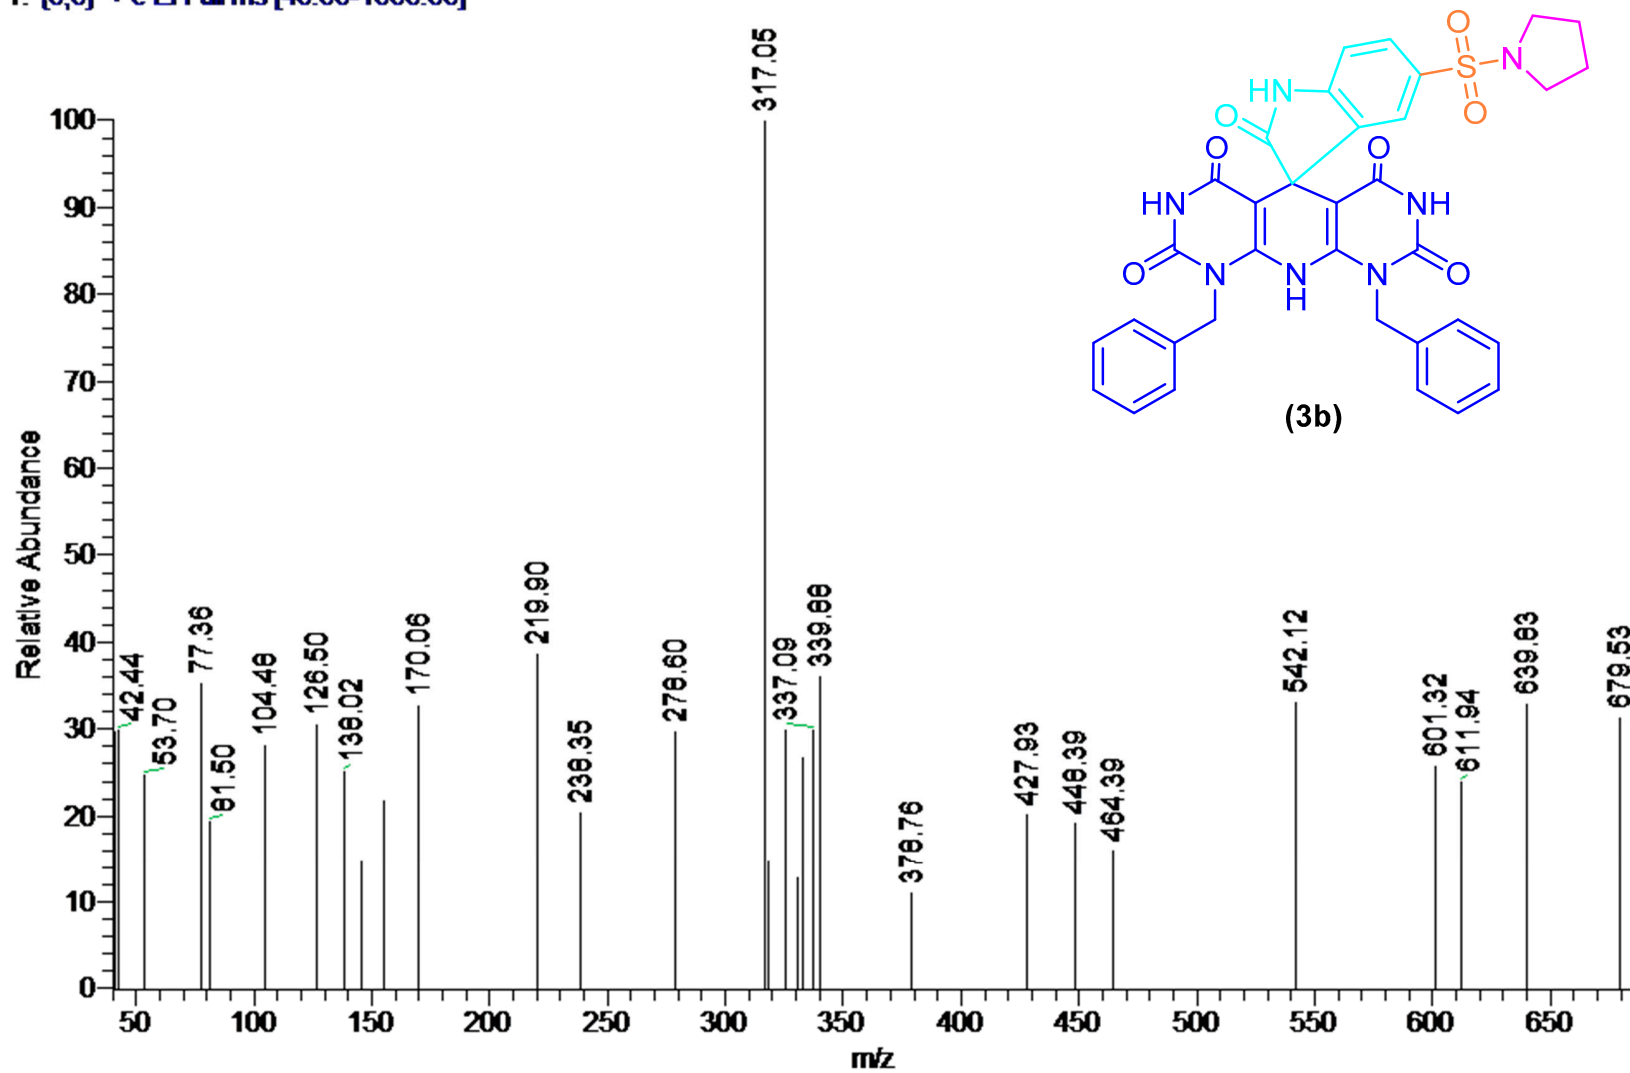

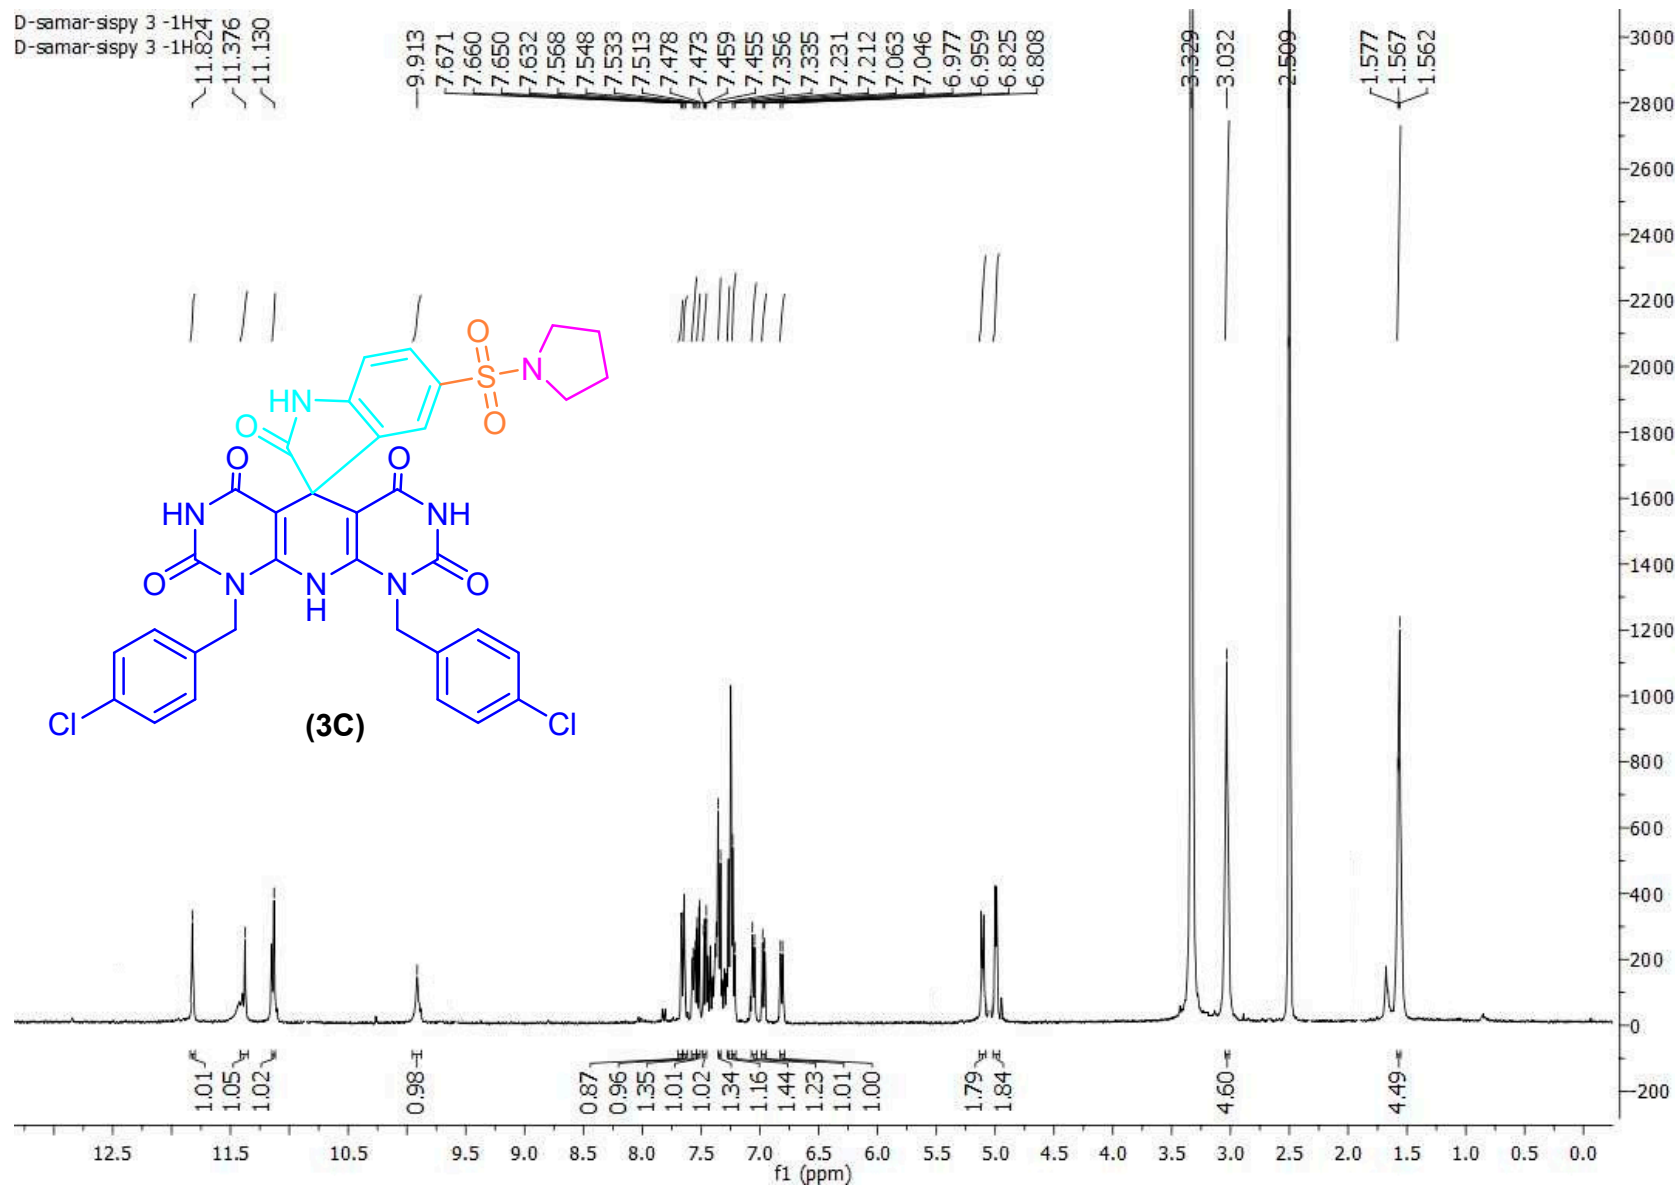

D-samar-sispy 3-1H  
D-samar-sispy 3-1H

180.80  
166.13  
160.75  
157.66  
150.12  
145.15  
139.31  
134.32  
133.32  
131.55  
130.22  
129.58  
129.31  
128.52  
127.19  
126.19  
125.56

98.41

83.55

50.31

47.85

44.50

24.55

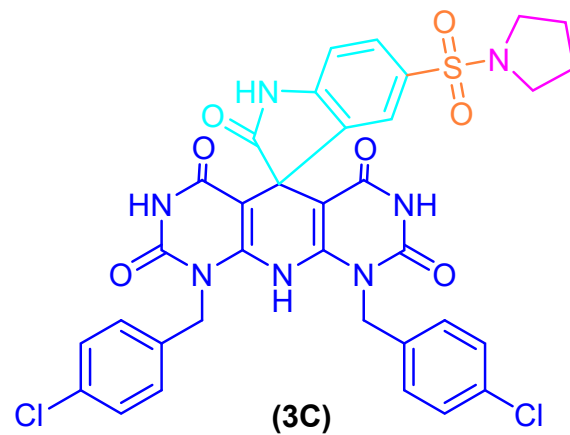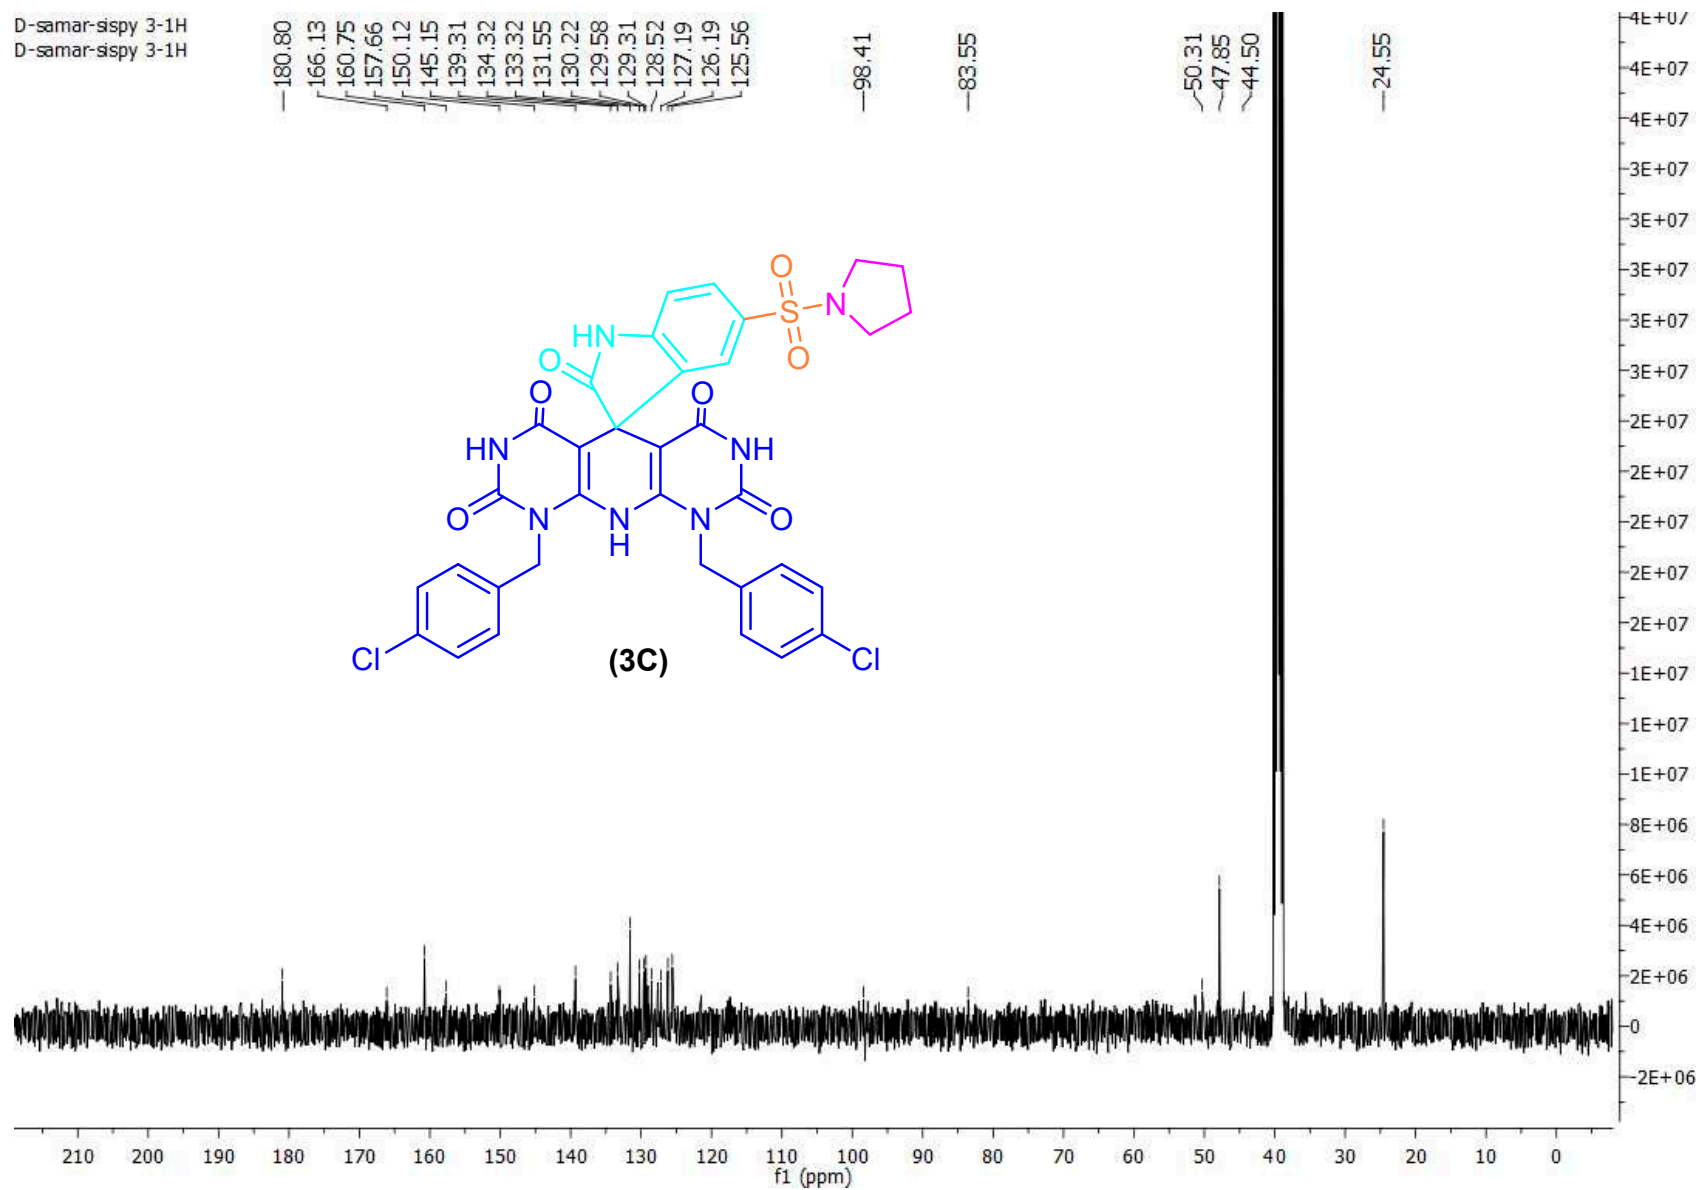

samar-Elkaliopy-sispy3 #63-66 RT: 1.07-1.12 AV: 4 SB: 2 4.45, 4.45 NL: 1.86E2  
T: {0,0} +c EI Full ms [40.00-1000.00]

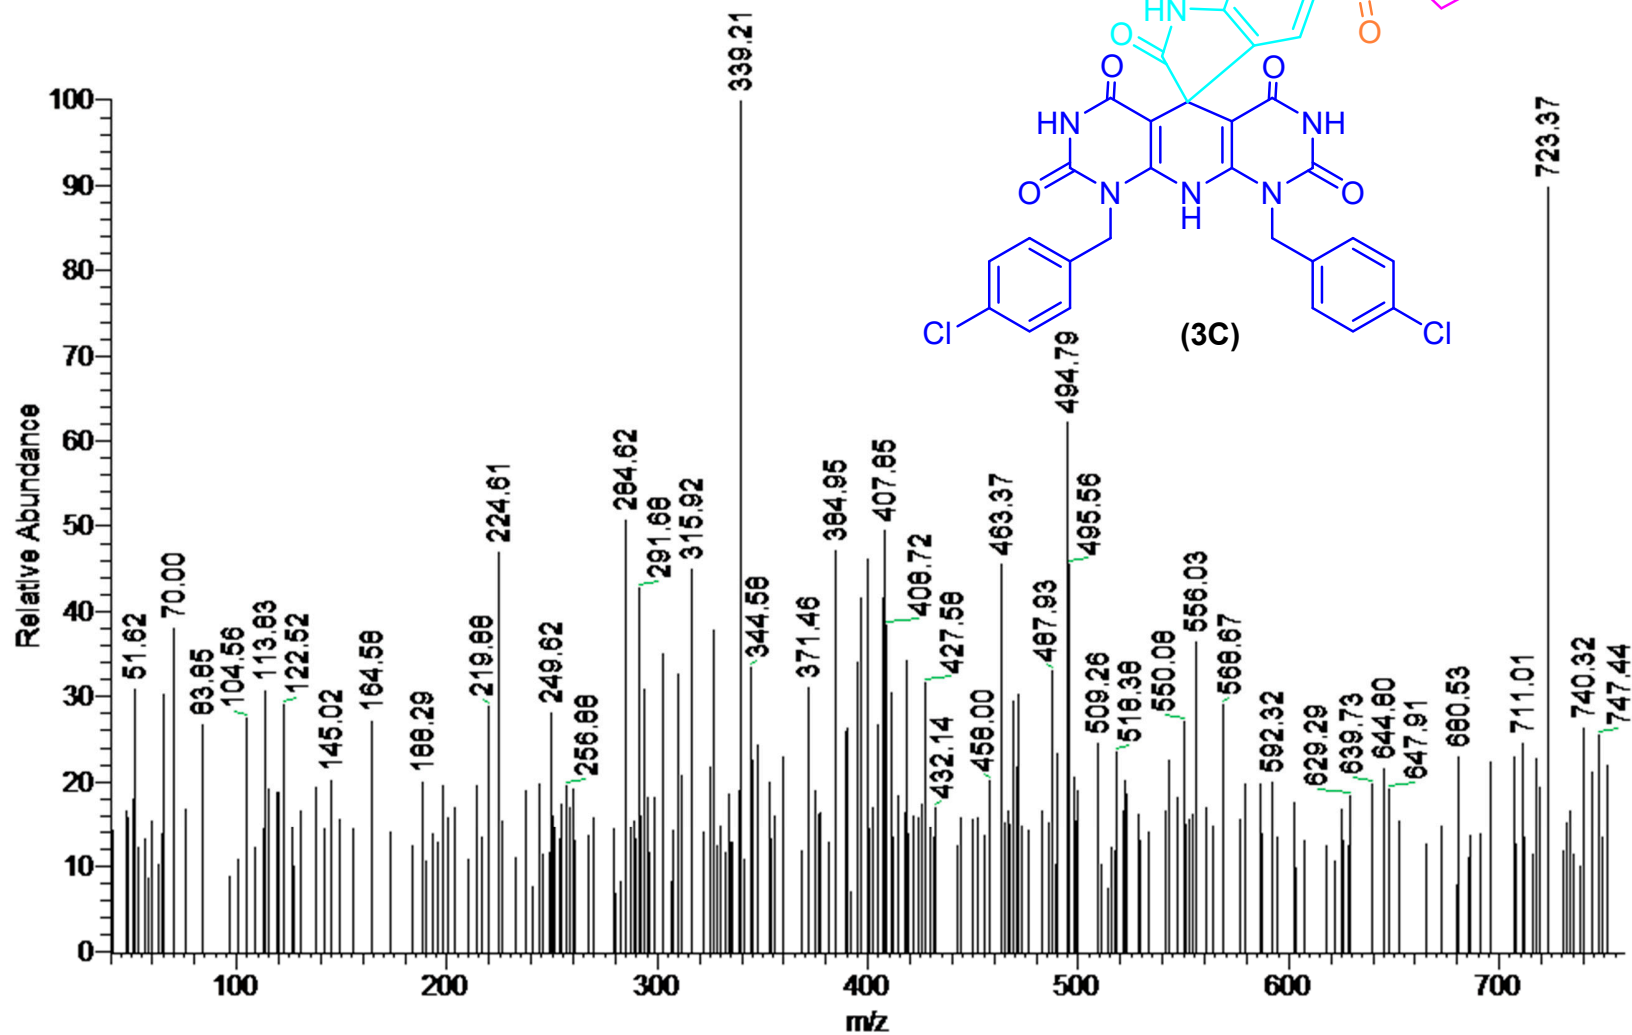

D-samar-sispy 2-1H  
D-samar-sispy 2-1H

~12.550  
~12.438  
~11.944

~9.929

7.713  
7.708  
7.691  
7.686  
7.585  
7.564  
7.244  
7.239

~3.960  
~3.738  
3.335  
3.064  
3.035  
3.010  
~2.508  
1.570  
1.553  
1.536

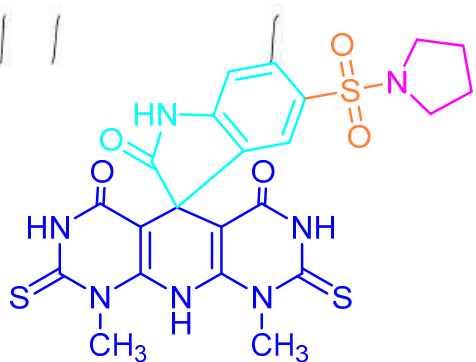

(3D)

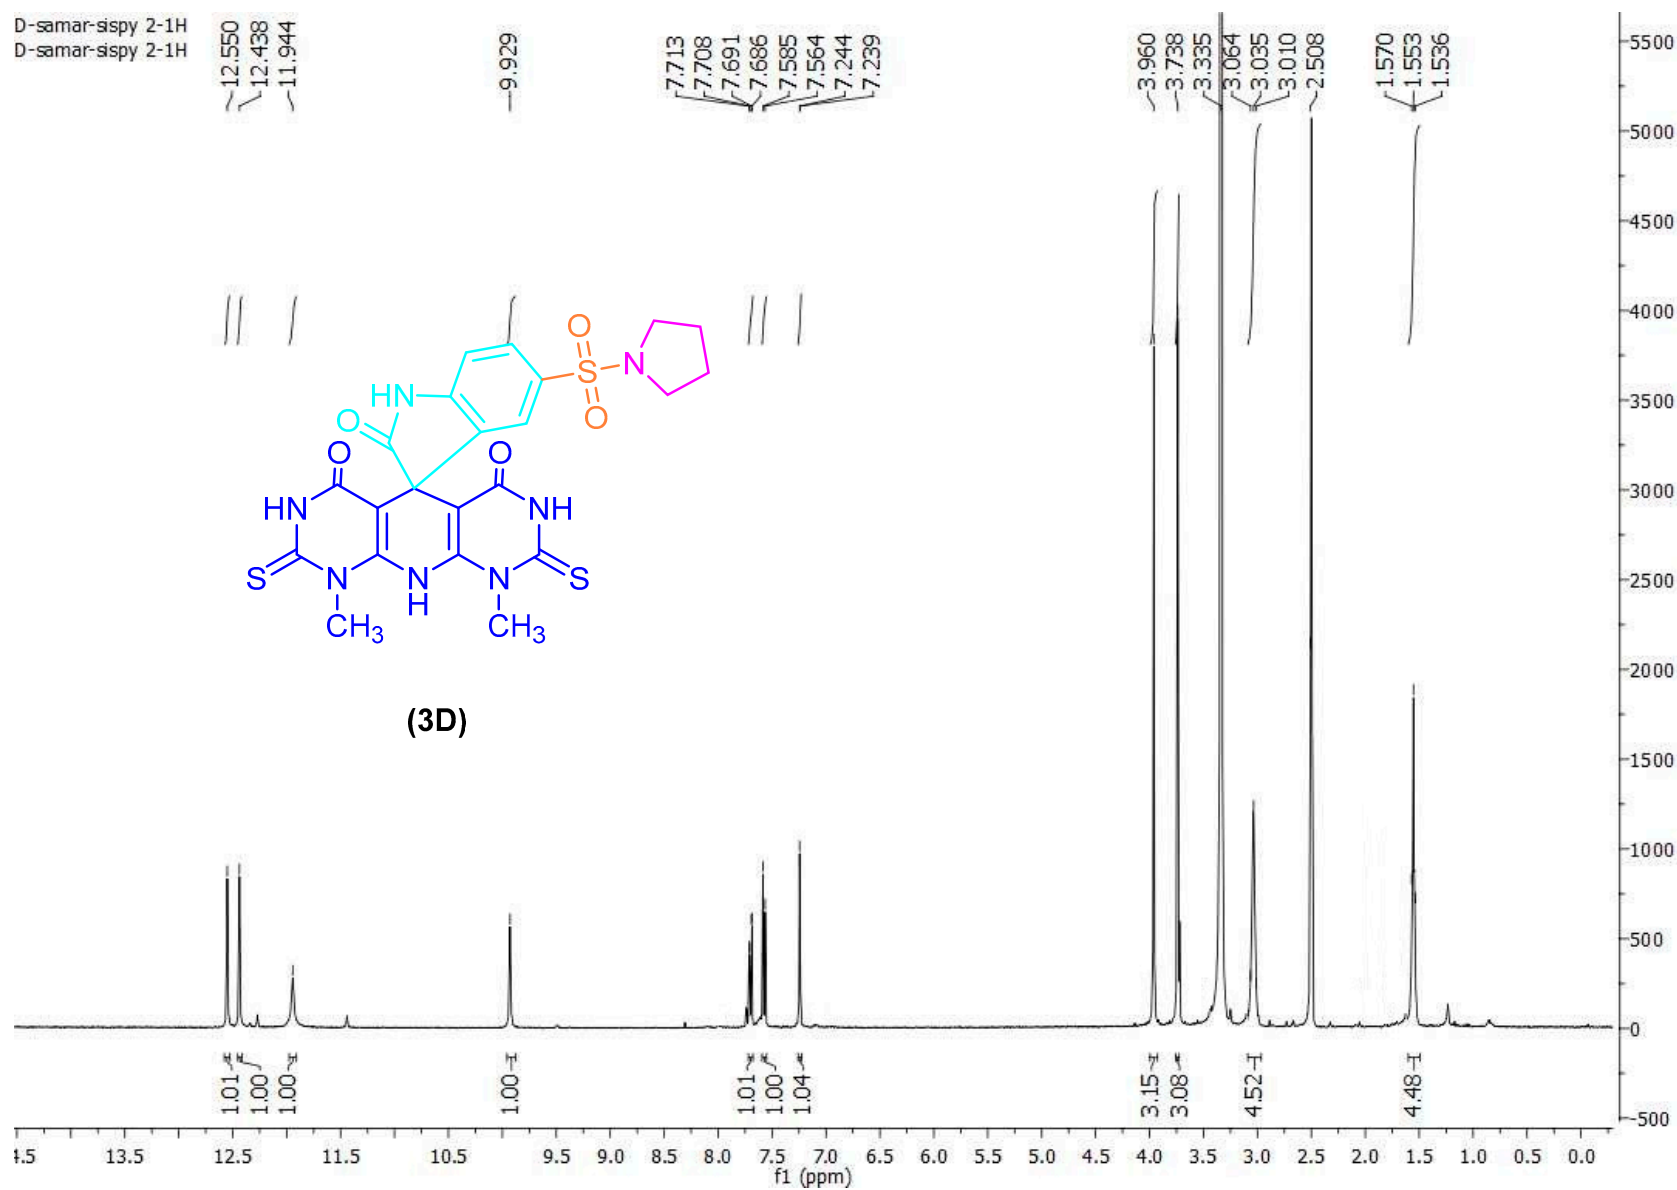



D-samar-sispy 2-c13  
D-samar-sispy 2-c13

180.289  
176.319  
175.559

157.797  
155.274  
153.714  
147.018  
139.504

131.413  
128.087  
125.164  
120.614  
118.280

102.228

88.342

50.607  
48.031

36.811  
36.457

24.735

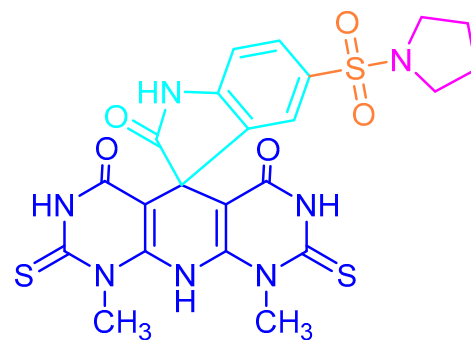

(3D)

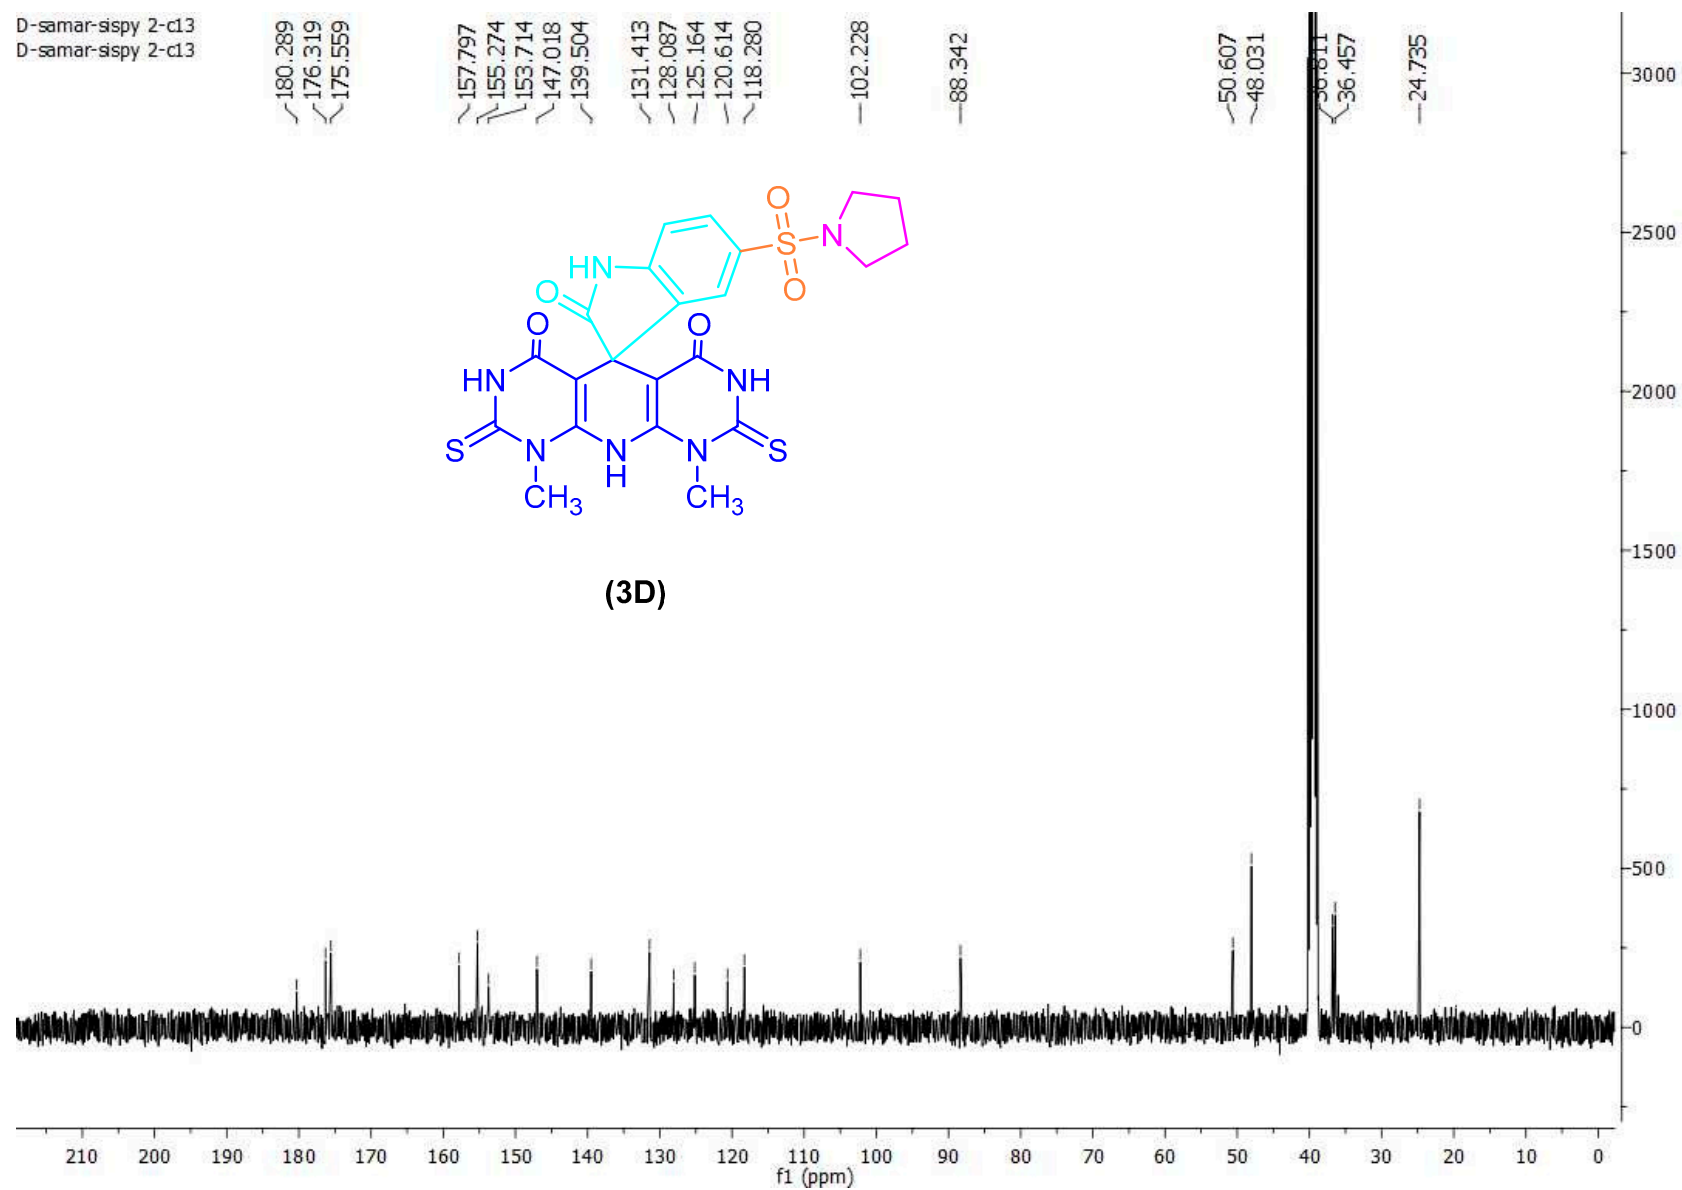

samar-Elkaliopy-sispy2 #118 RT: 1.99 AV: 1 SB: 2 4.45, 4.45 NL: 4.65E2  
T: {0,0} +c EI Full ms [40.00-1000.00]

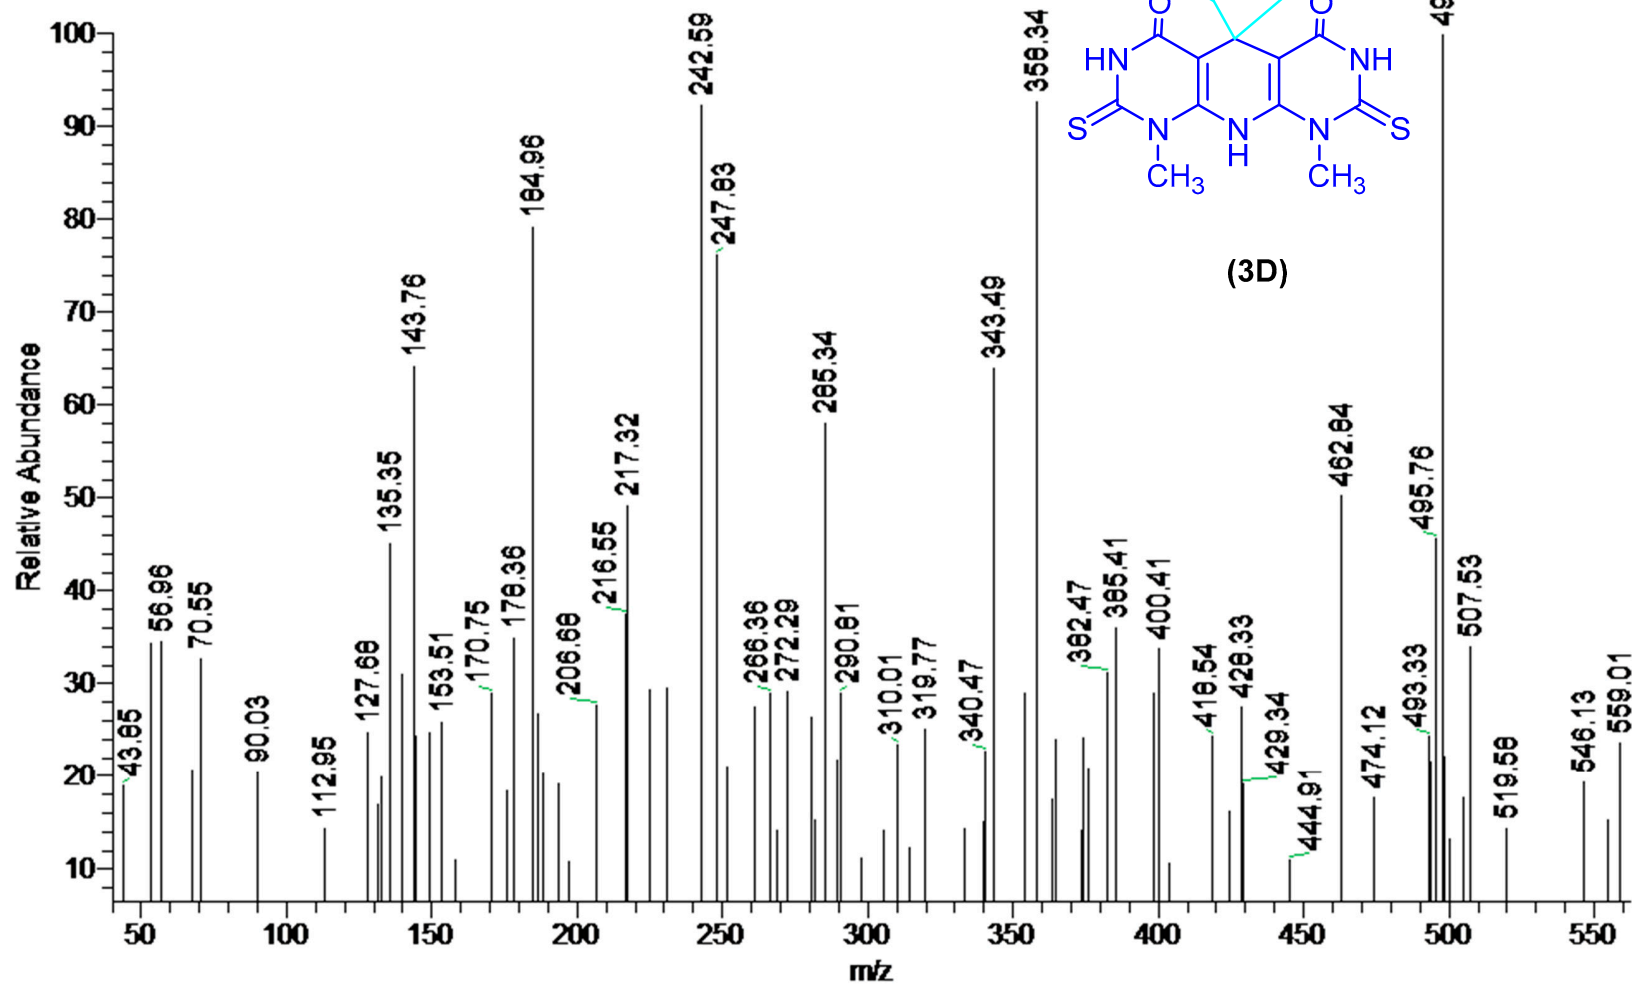

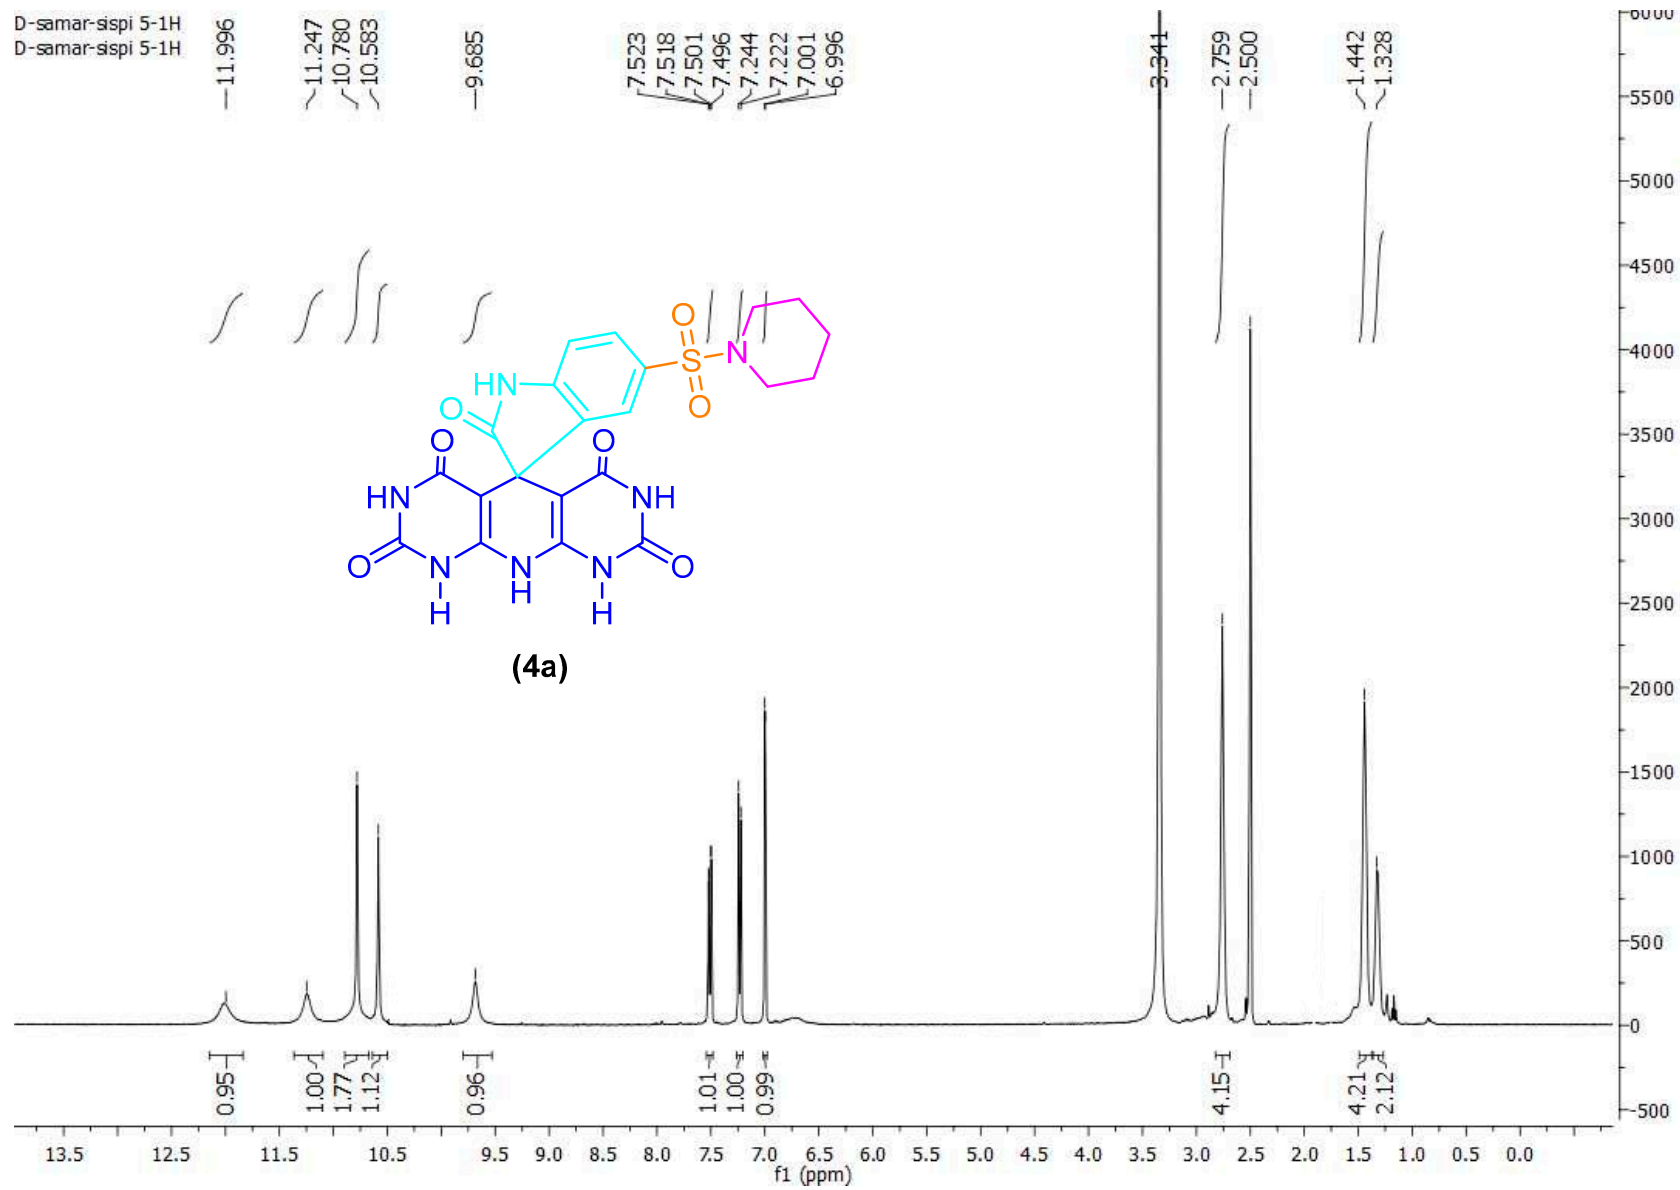

D-samar-sispi 5-c13  
D-samar-sispi 5-c13

— 180.78

~ 165.81

~ 161.96

~ 158.63

~ 153.67

~ 149.85

~ 145.83

~ 139.39

~ 129.67

~ 127.57

~ 125.38

~ 121.79

~ 116.98

— 97.50

— 82.79

~ 49.05

~ 46.39

~ 24.46

~ 22.92

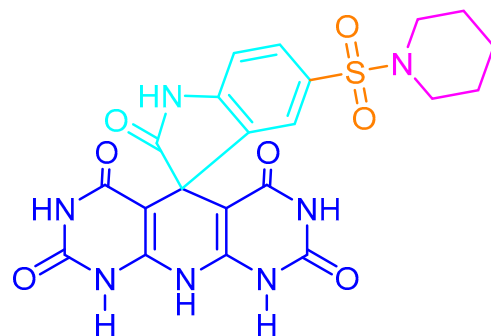

(4a)

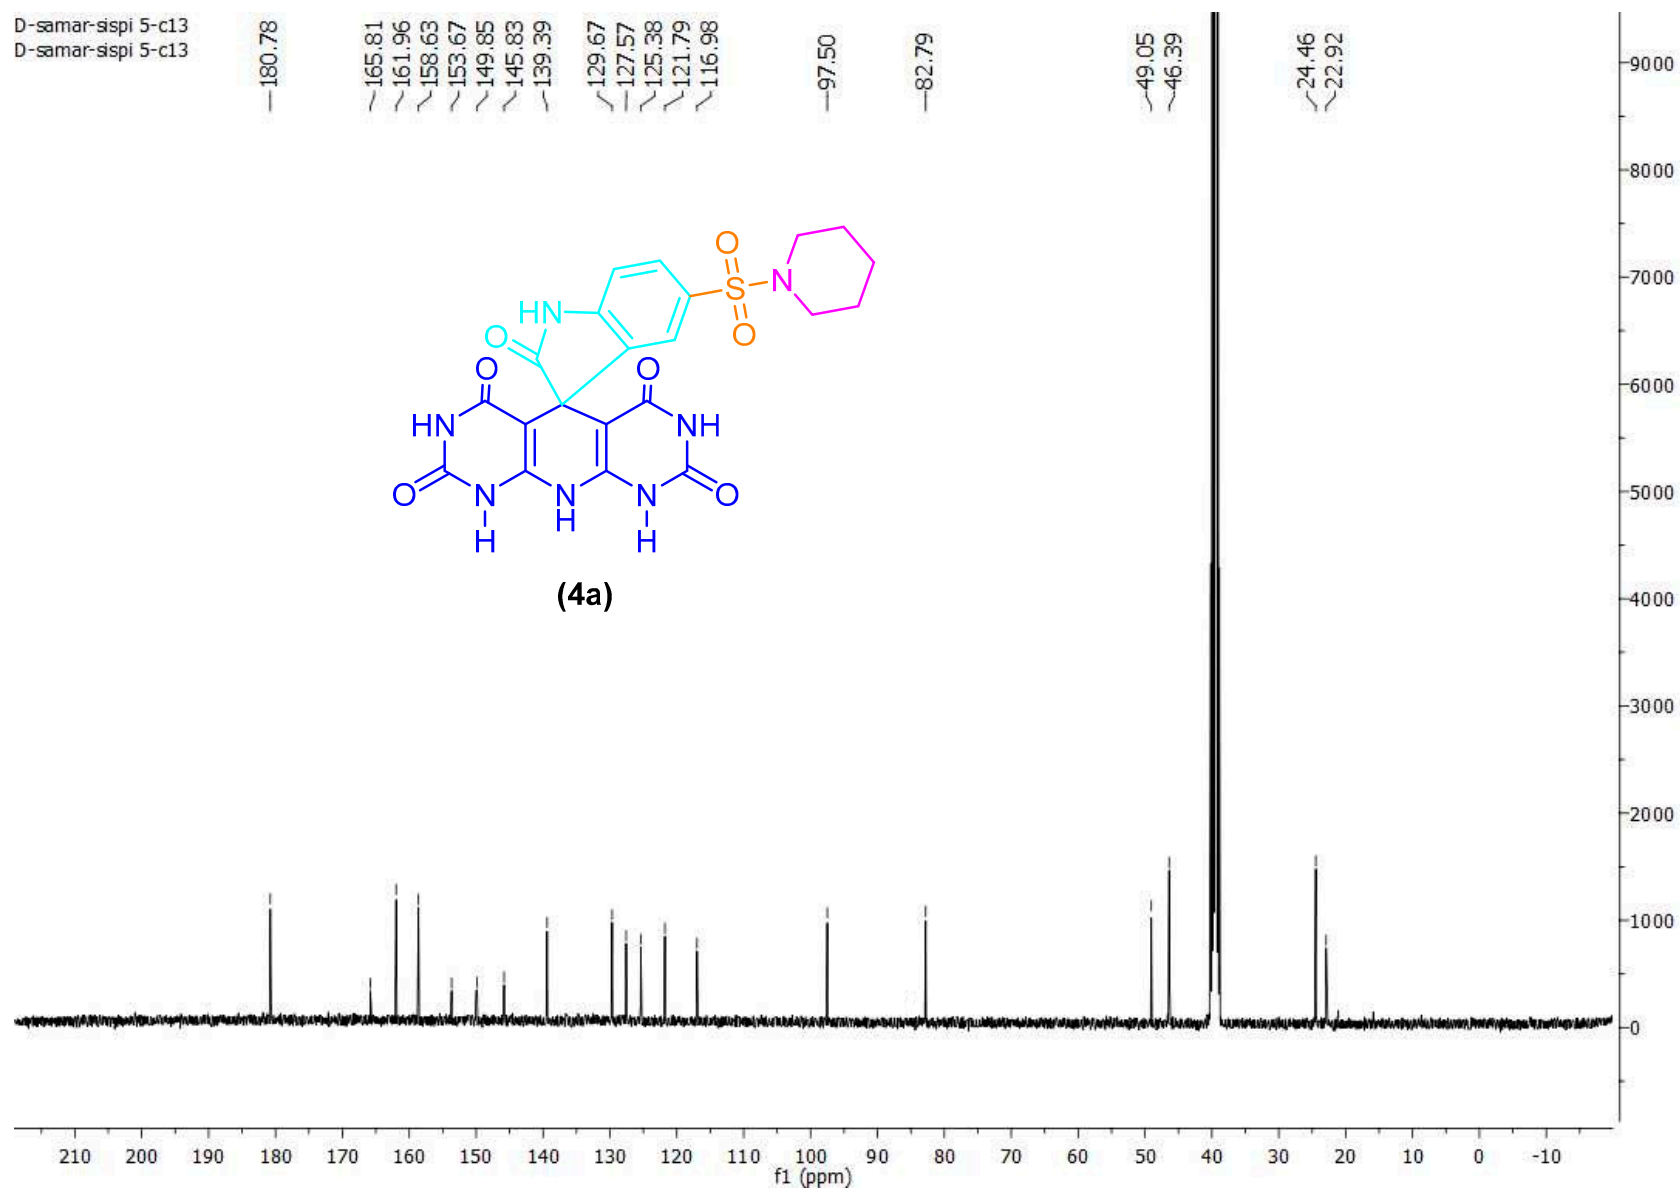

samar-Elkaliopy-sispi5 #118 RT: 1.99 AV: 1 SB: 2 4.45, 4.45 NL: 3.60E2  
T: {0,0} +c EI Full ms [40.00-1000.00]

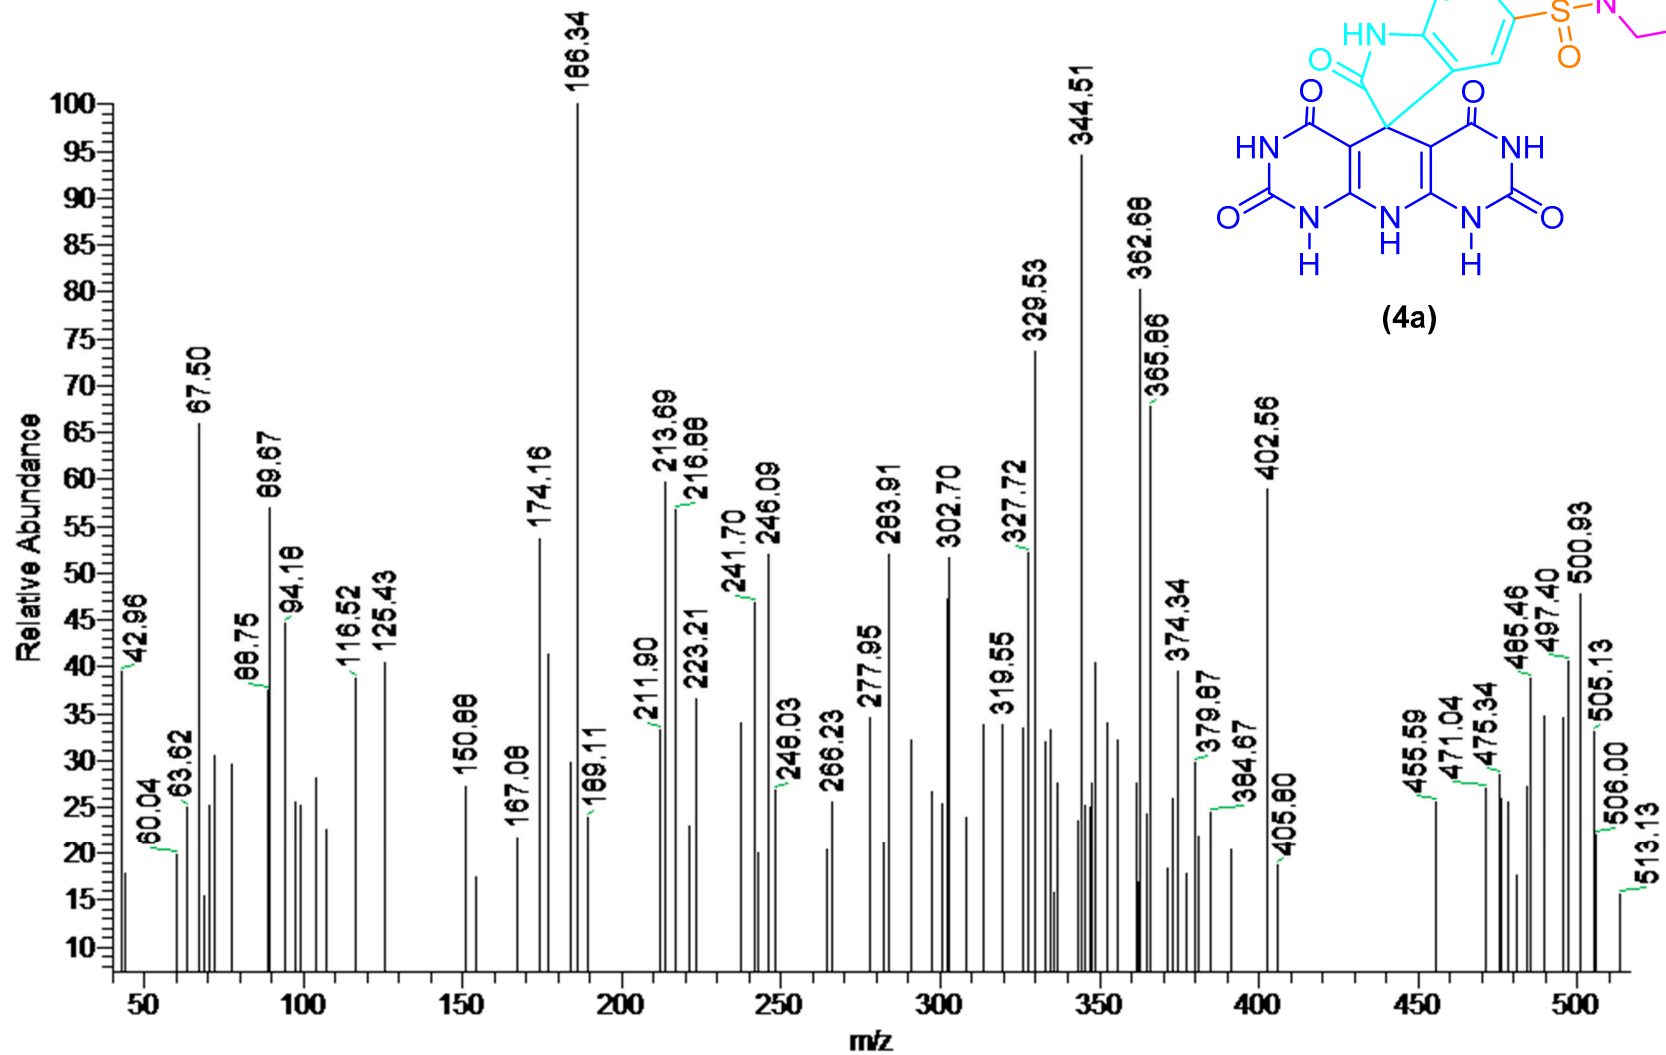

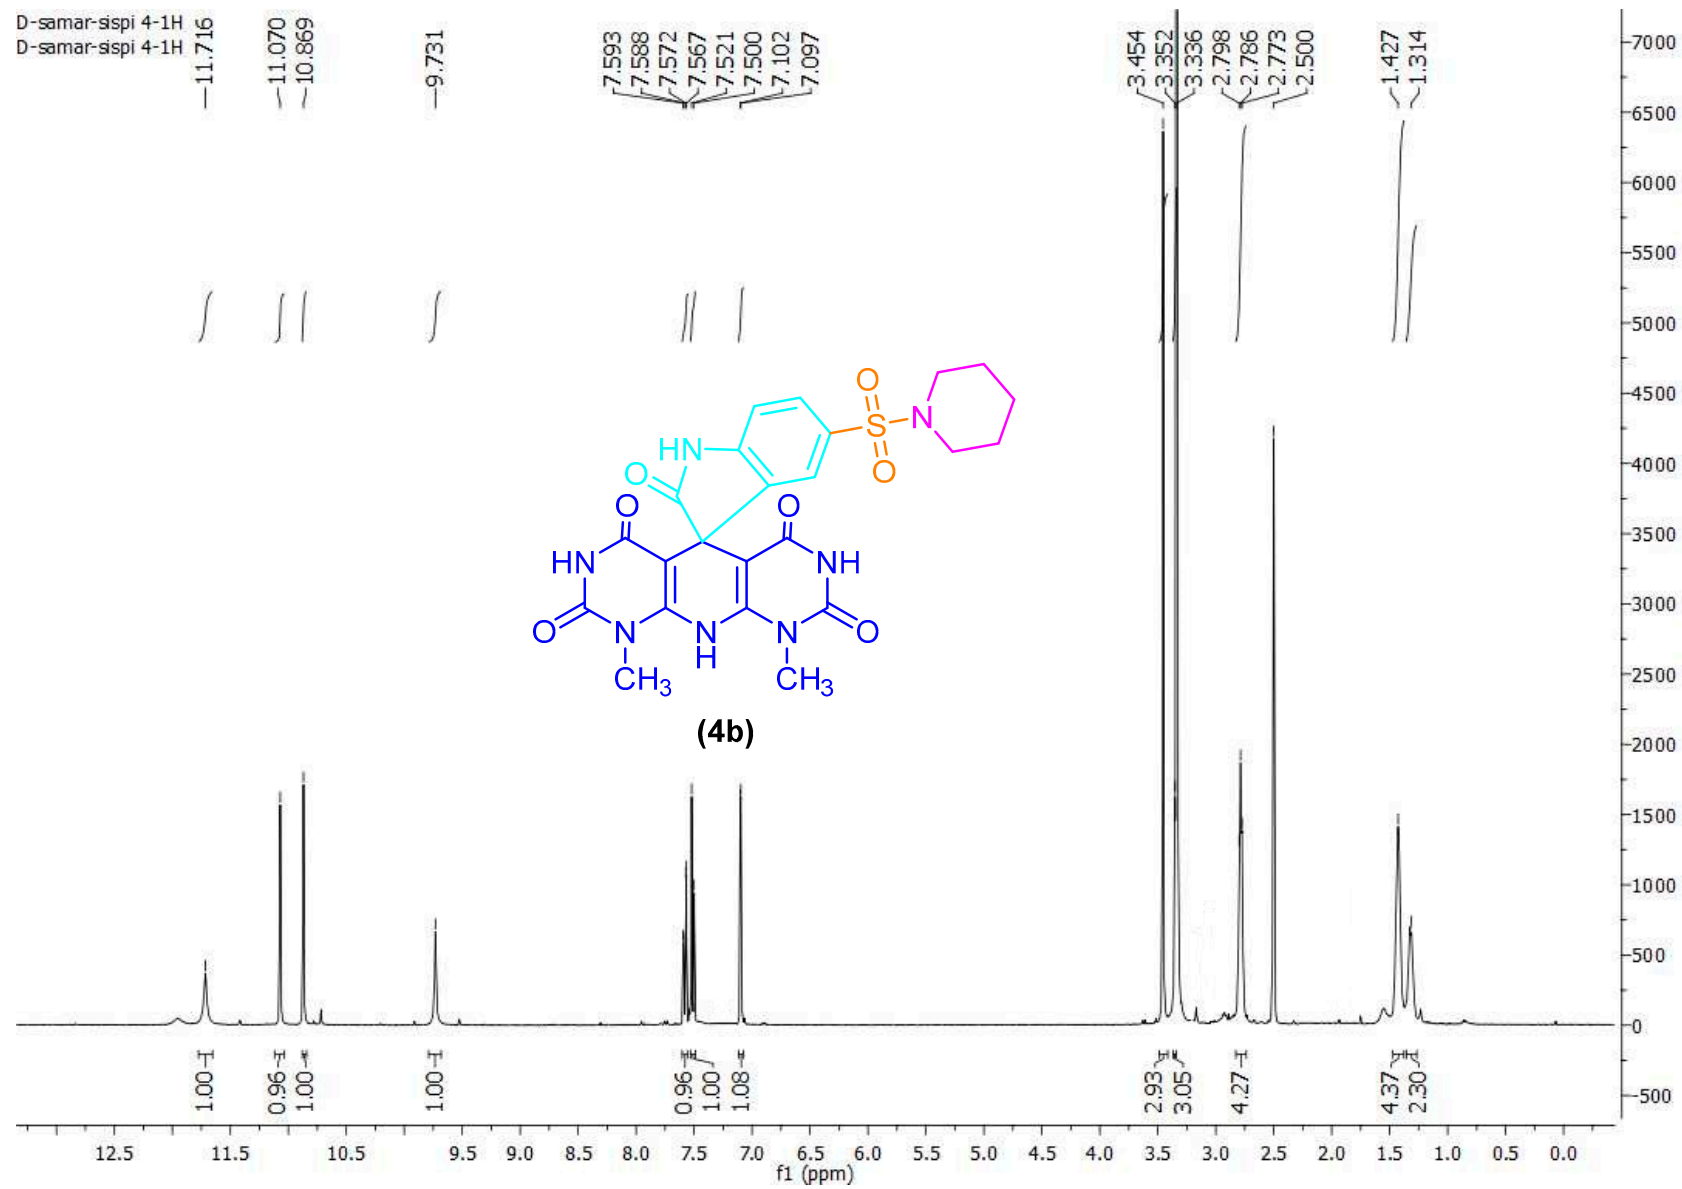

D-samar-sispi 4-c13  
D-samar-sispi 4-c13

—181.05

—172.05

—160.51

—157.66

—150.69

—149.92

—146.80

—139.66

—130.33

—127.53

—125.30

—121.62

—117.57

—98.09

—83.79

—50.25

—46.38

—30.33

—29.29

—24.42

—22.94

—21.08

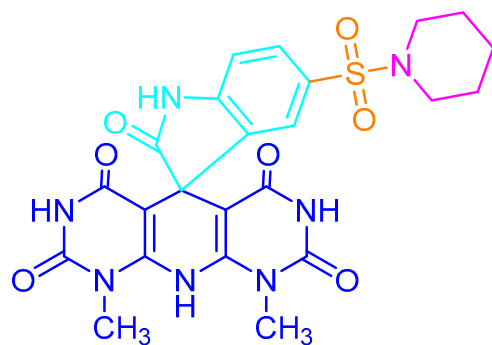

(4b)

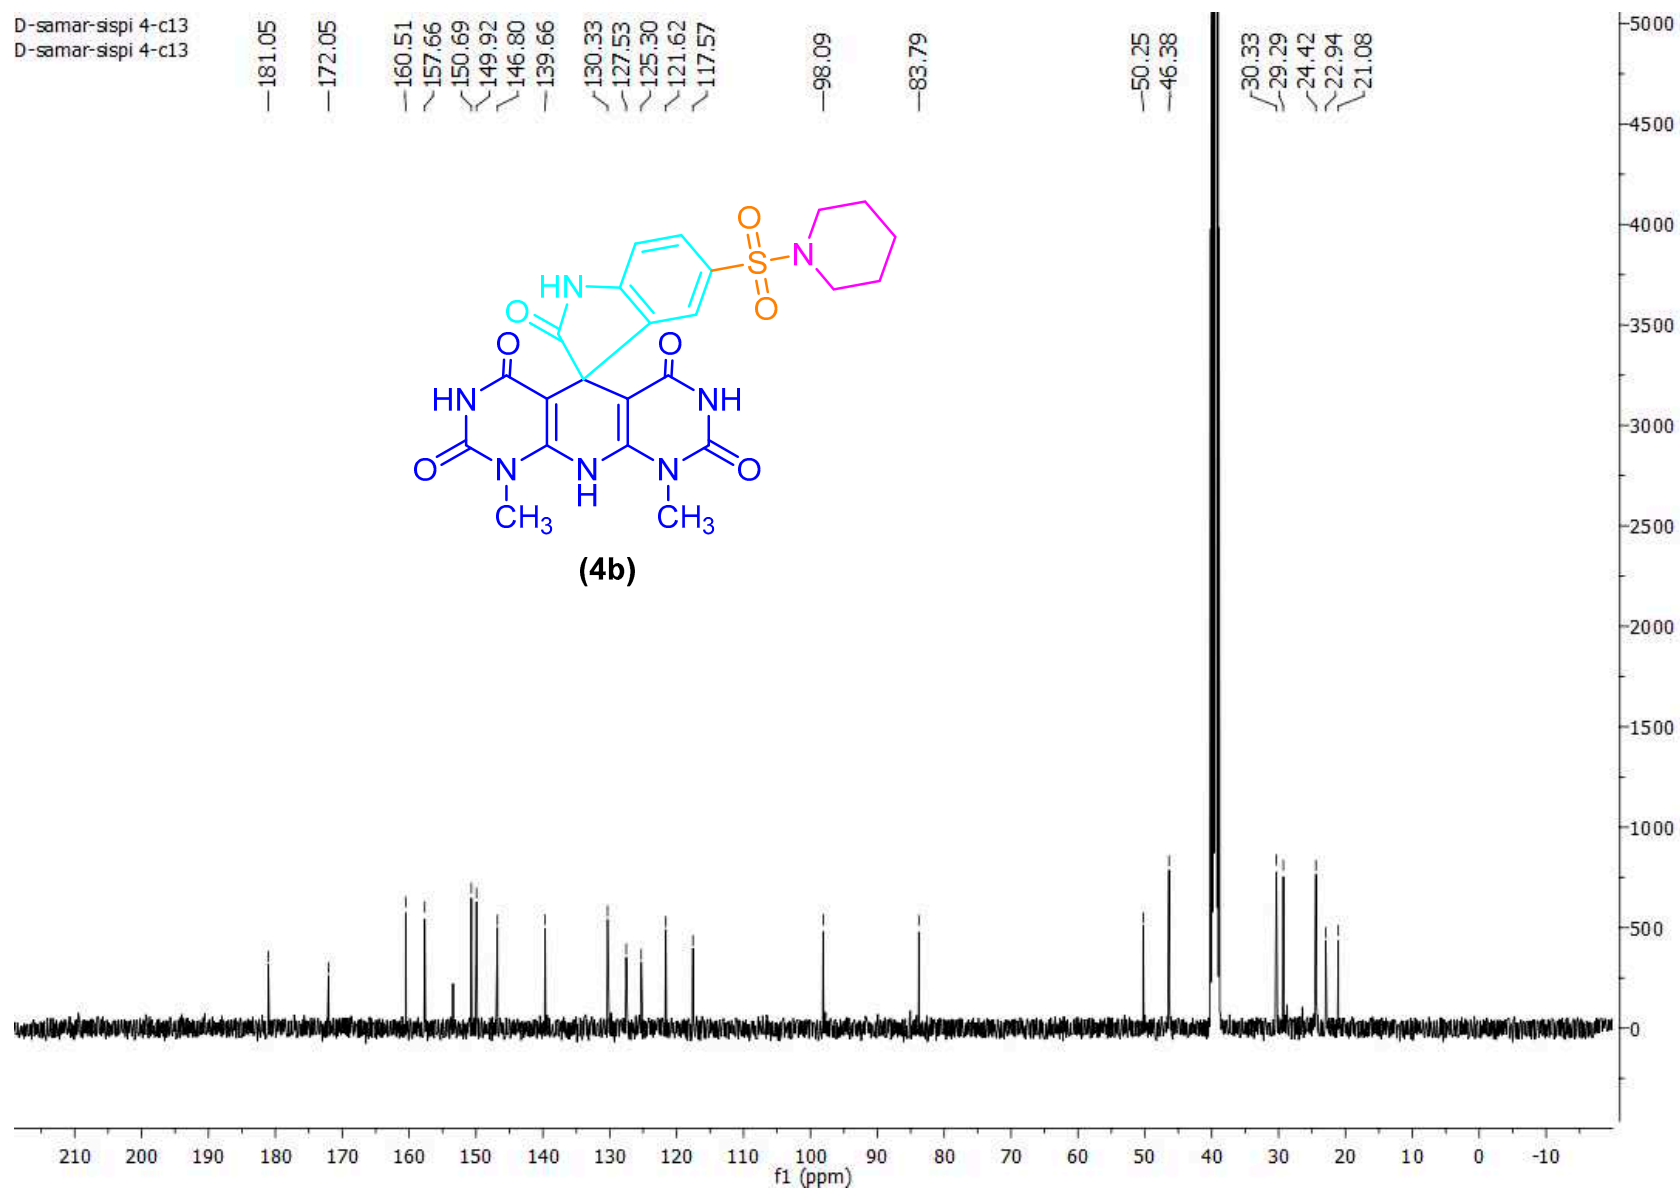

samar-Elkaliopy-sispi4 #157 RT: 2.64 AV: 1 SB: 2 4.45, 4.45 NL: 4.53E2  
T: {0,0} +c EI Full ms [40.00-1000.00]

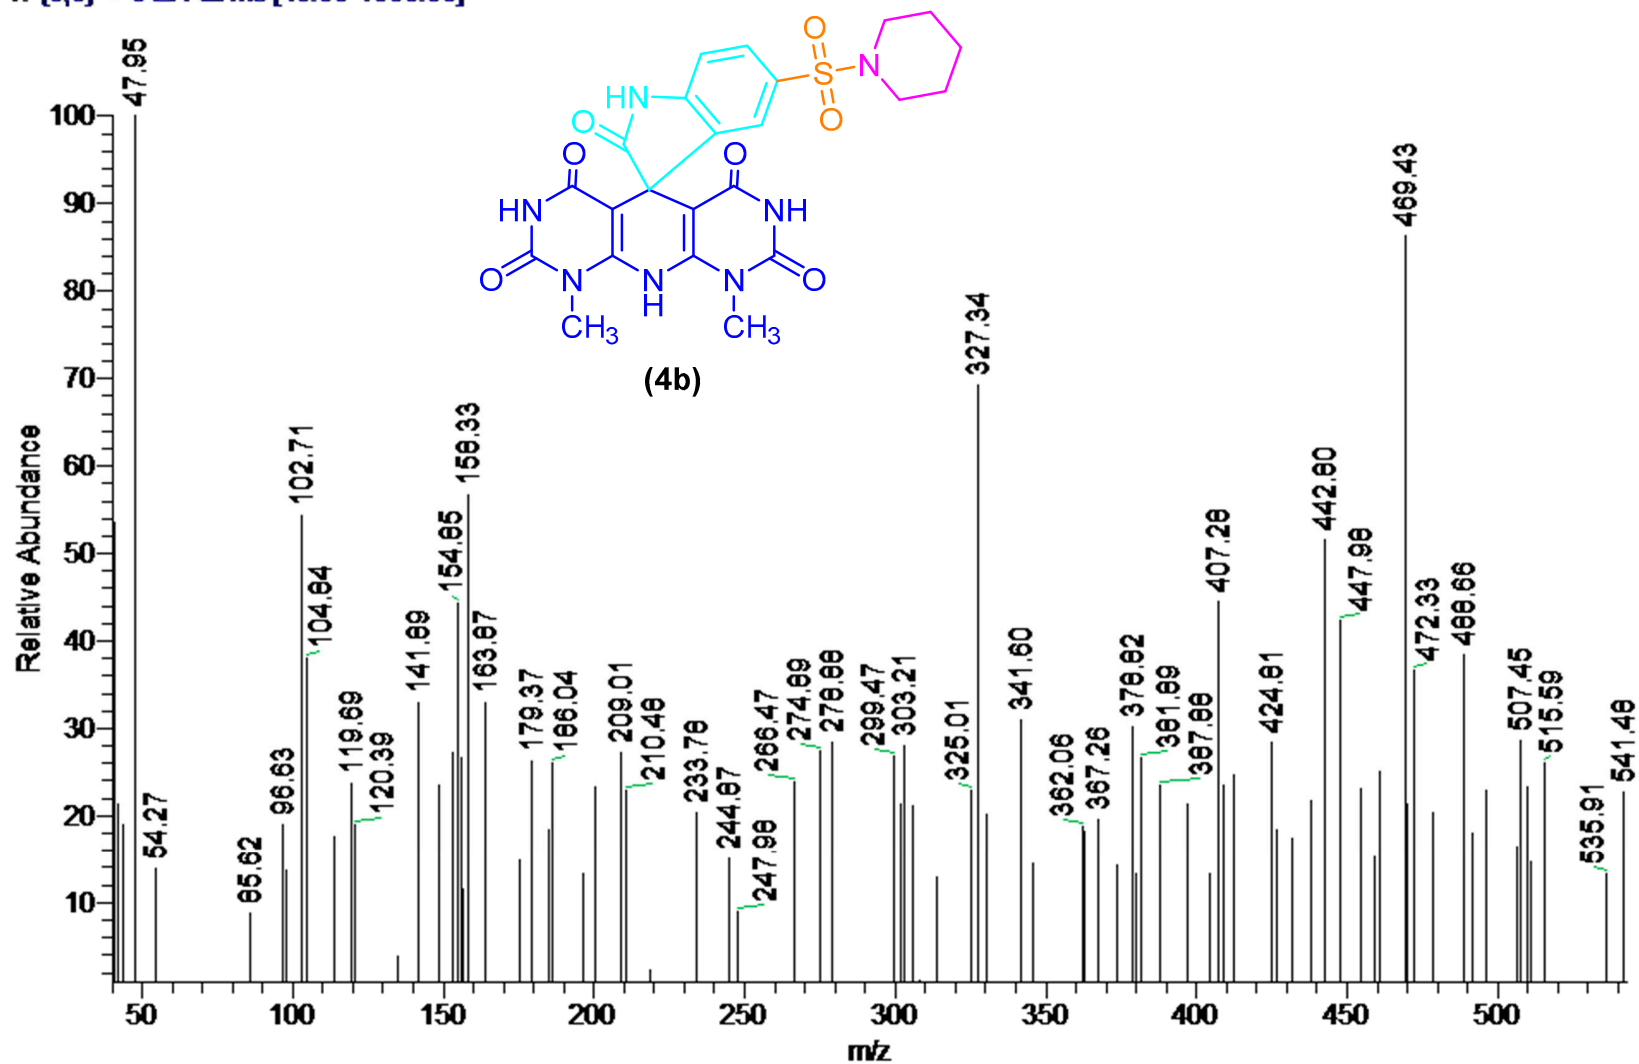



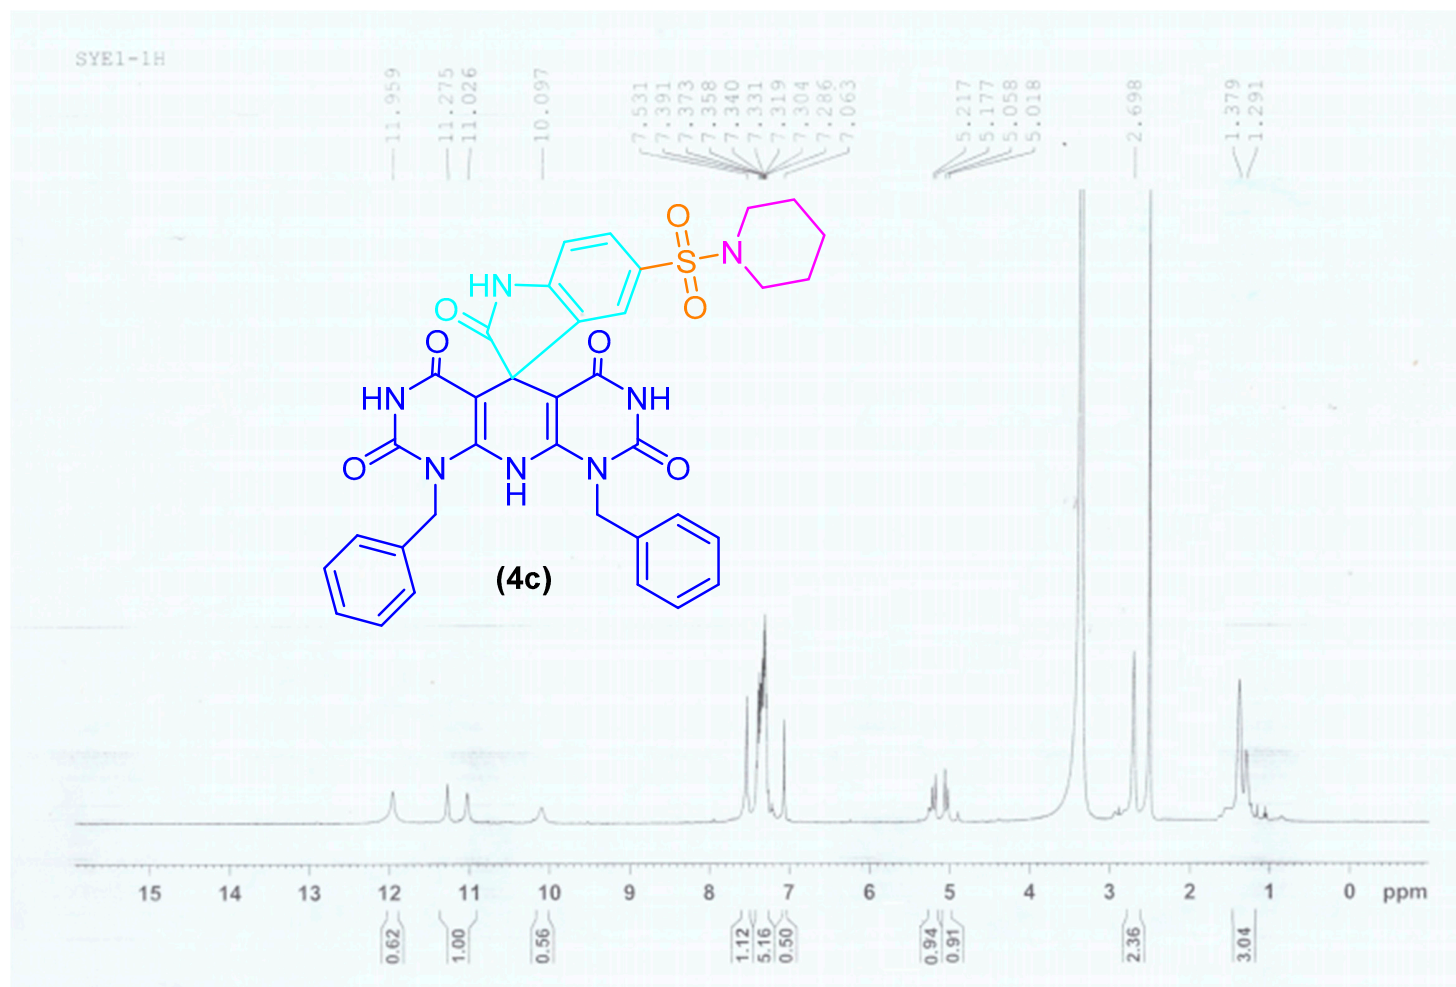

SYE1-c13

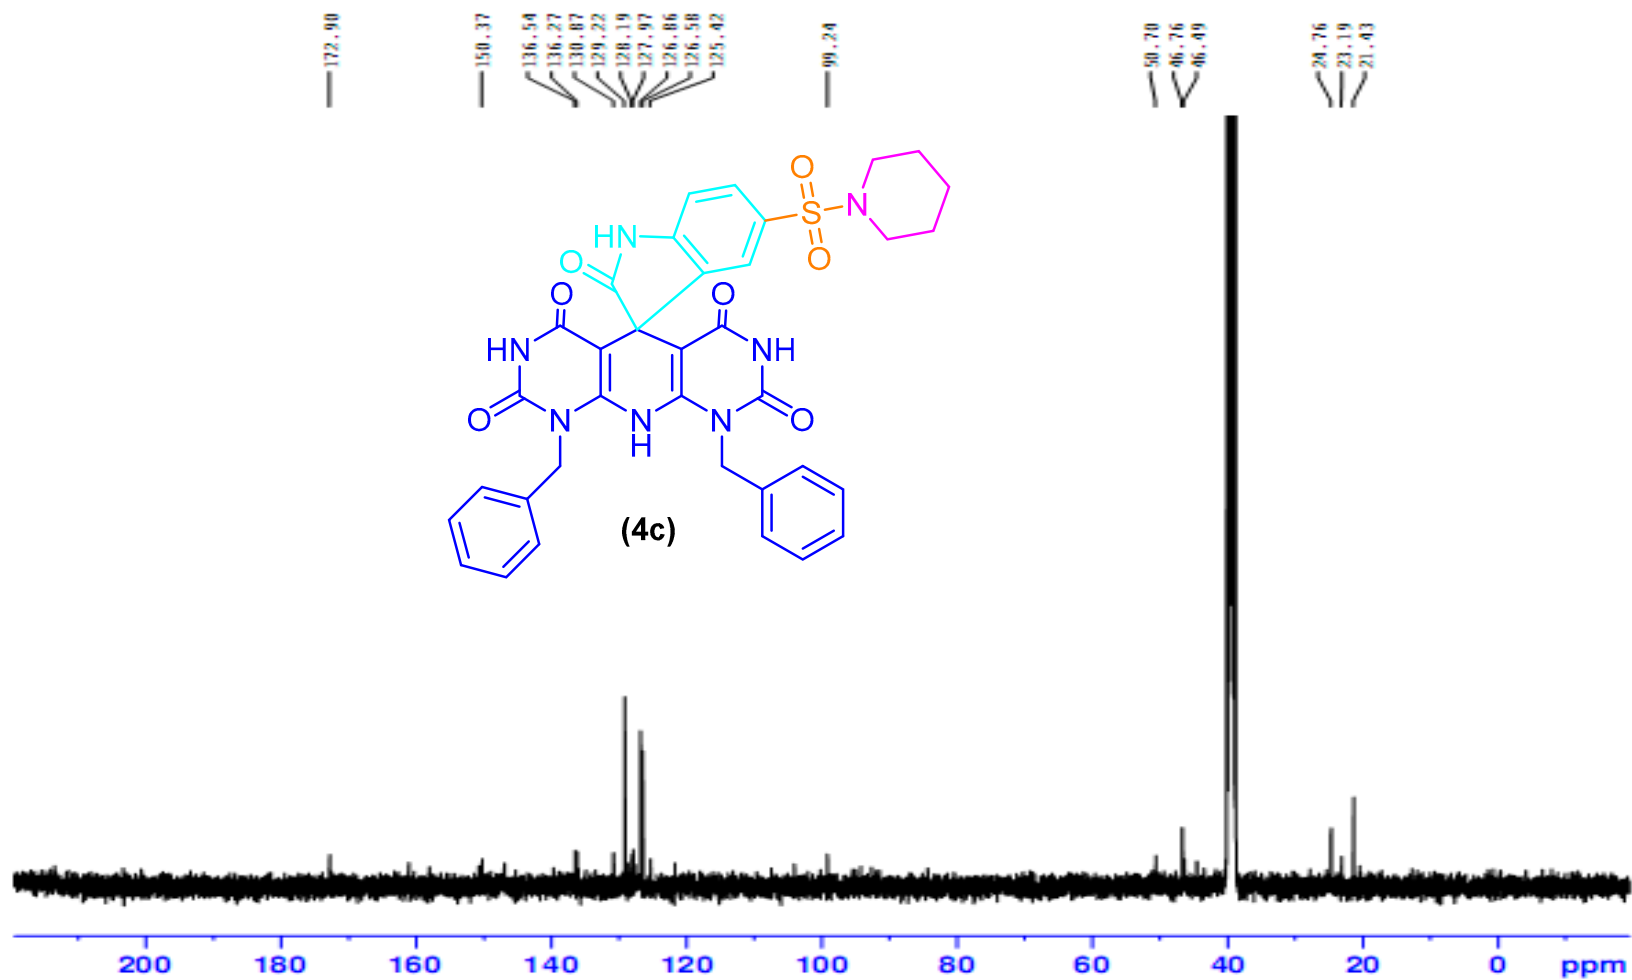

samar-Elkaliopy-sispi1#170 RT: 2.86 AV: 1 SB: 2 4.45, 4.45 NL: 5.60E2  
T: {0,0} +c EI Full ms [40.00-1000.00]

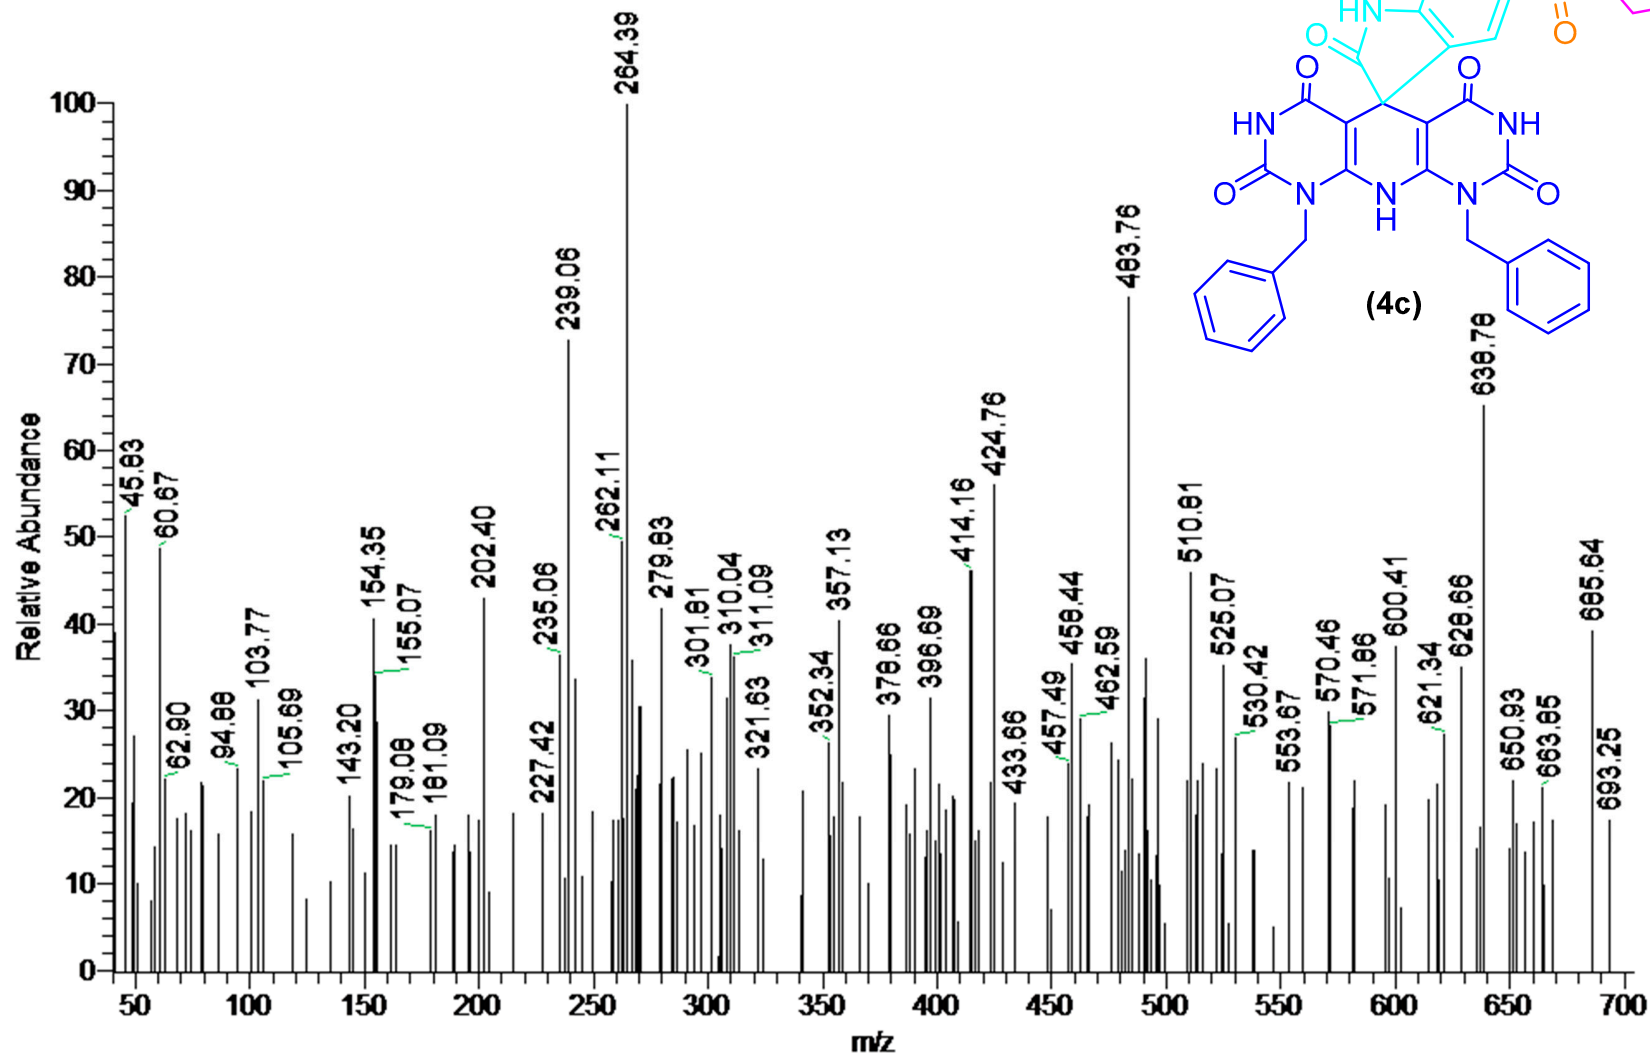



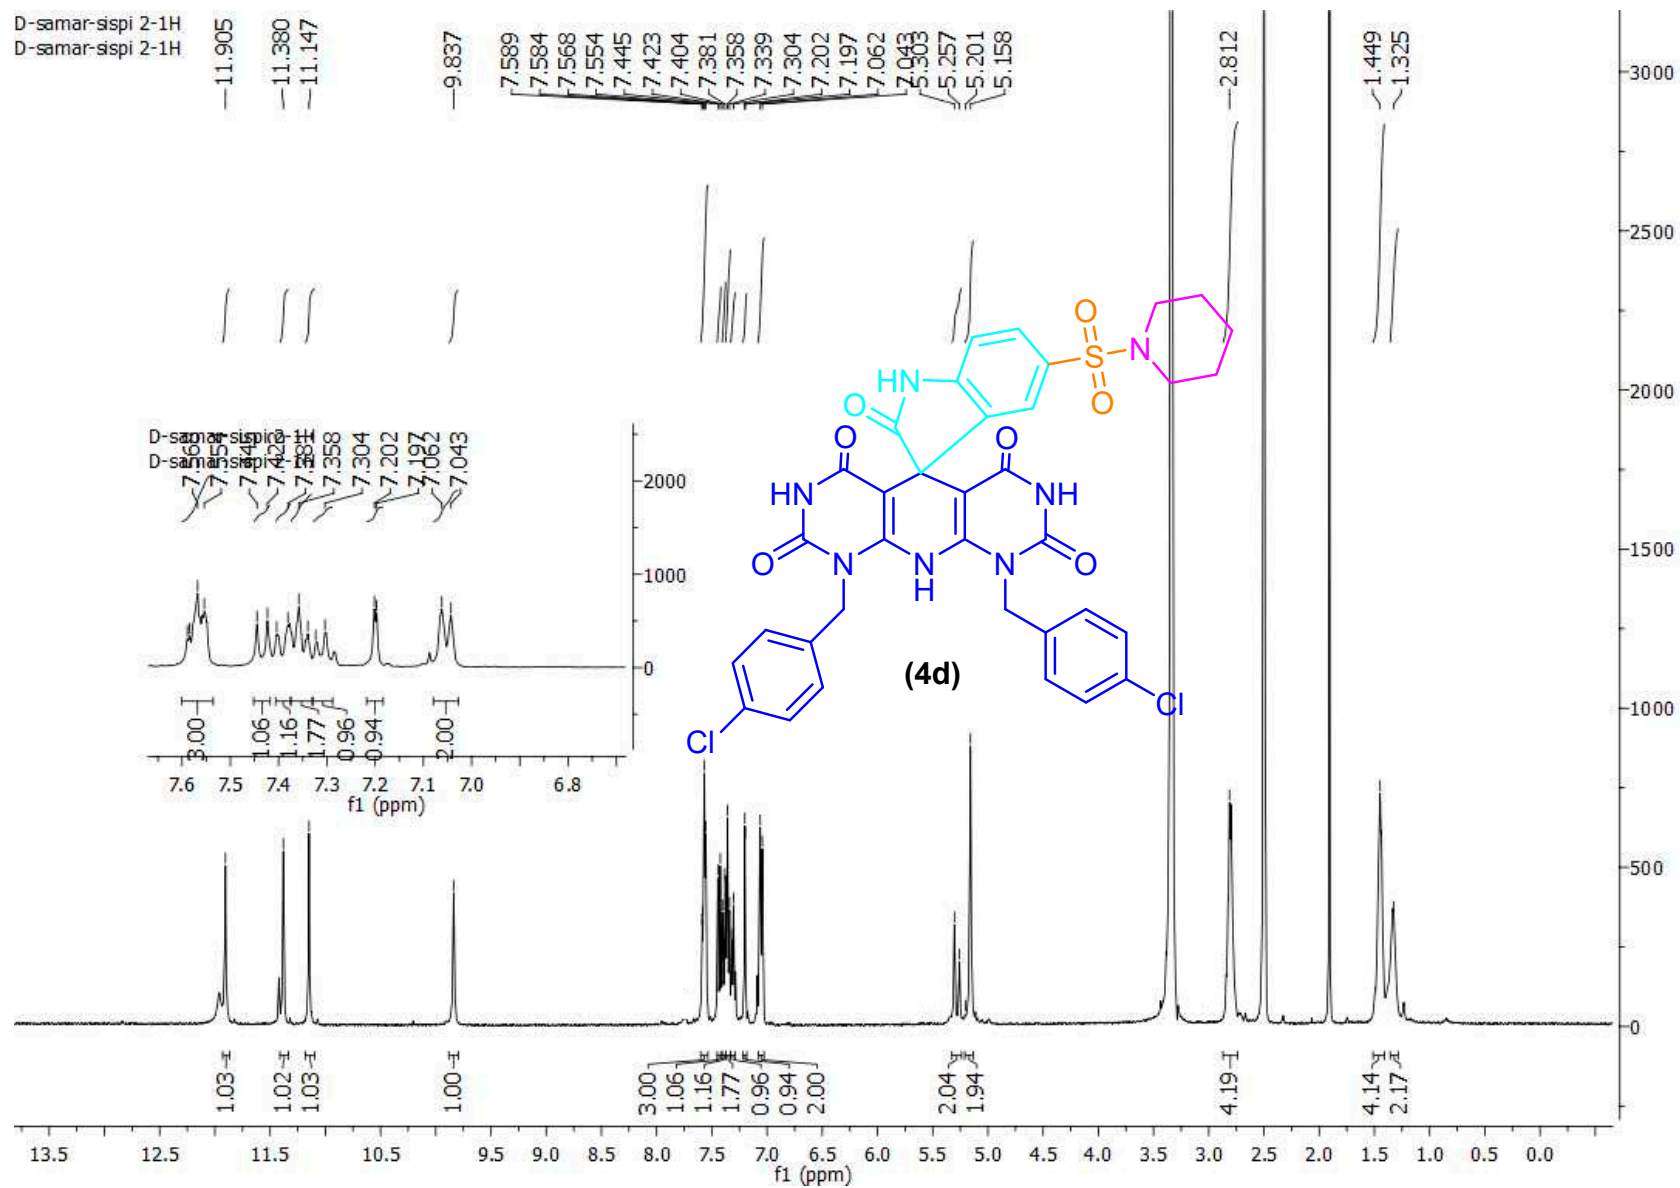

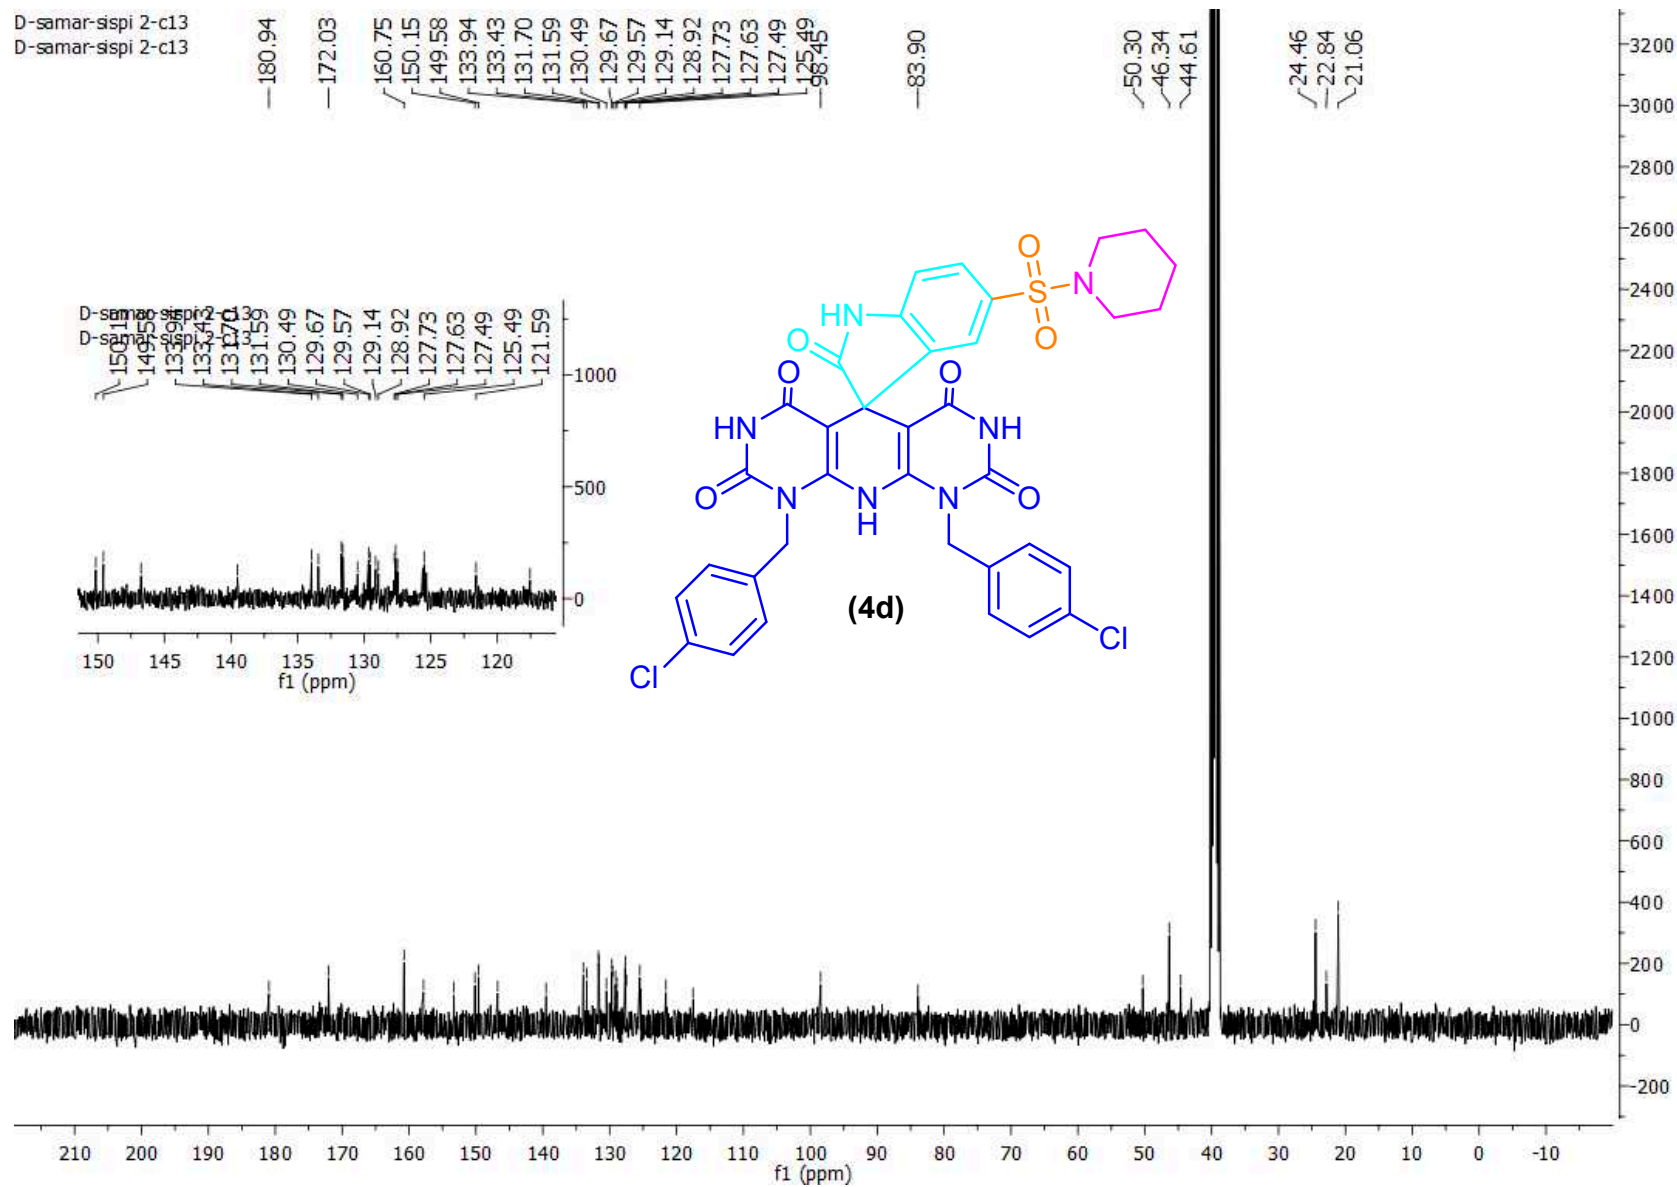

samar-Ekapi2-sispi2 #220 RT: 3.70 AV: 1 SB: 2 4.45, 4.45 NL: 3.26E2  
T: {0,0} + c EI Full ms [40.00-1000.00]

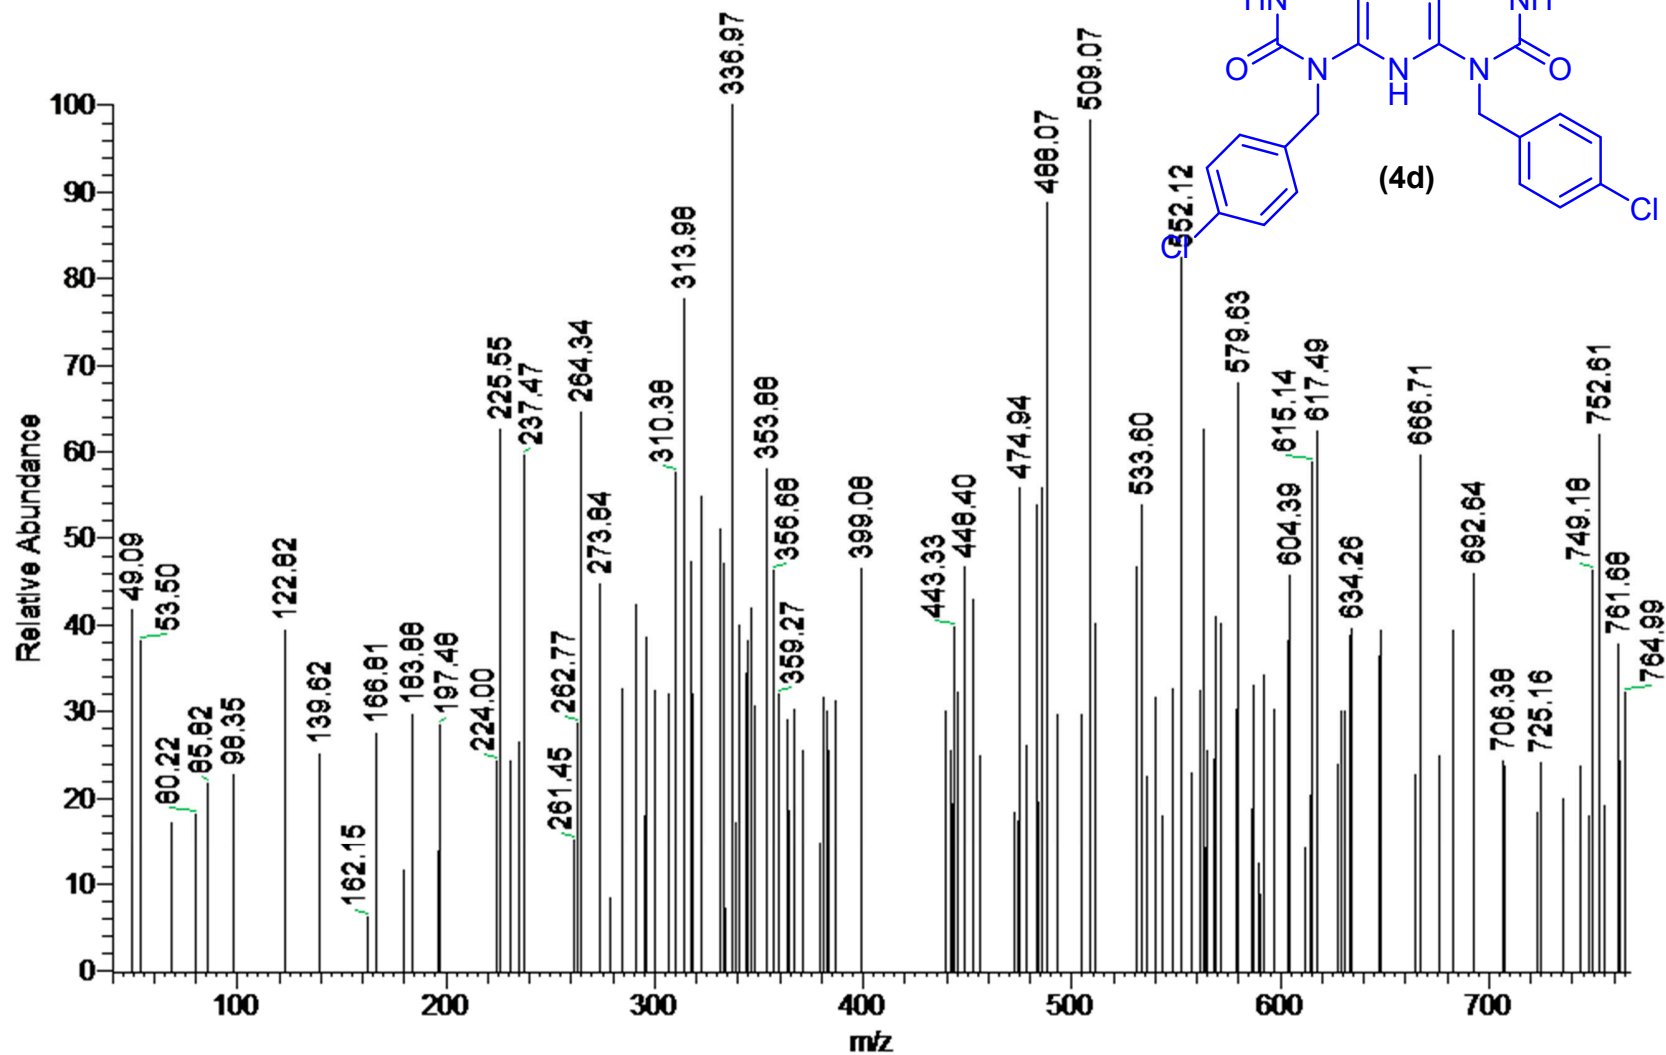

D-samar-sispi 3-1H  
D-samar-sispi 3-1H  
~12.559  
~12.446  
~11.953

—9.939  
7.640  
7.635  
7.619  
7.614  
7.586  
7.565  
7.170  
7.165

~3.963  
~3.737  
3.334  
—2.796  
2.491  
~1.427  
~1.333

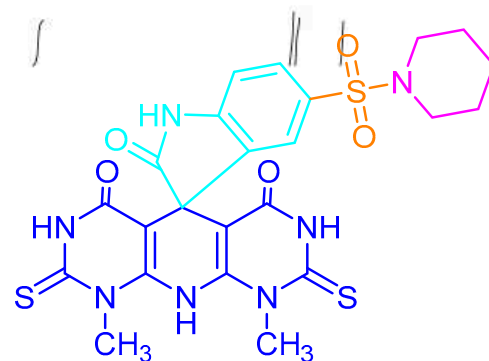

(4e)

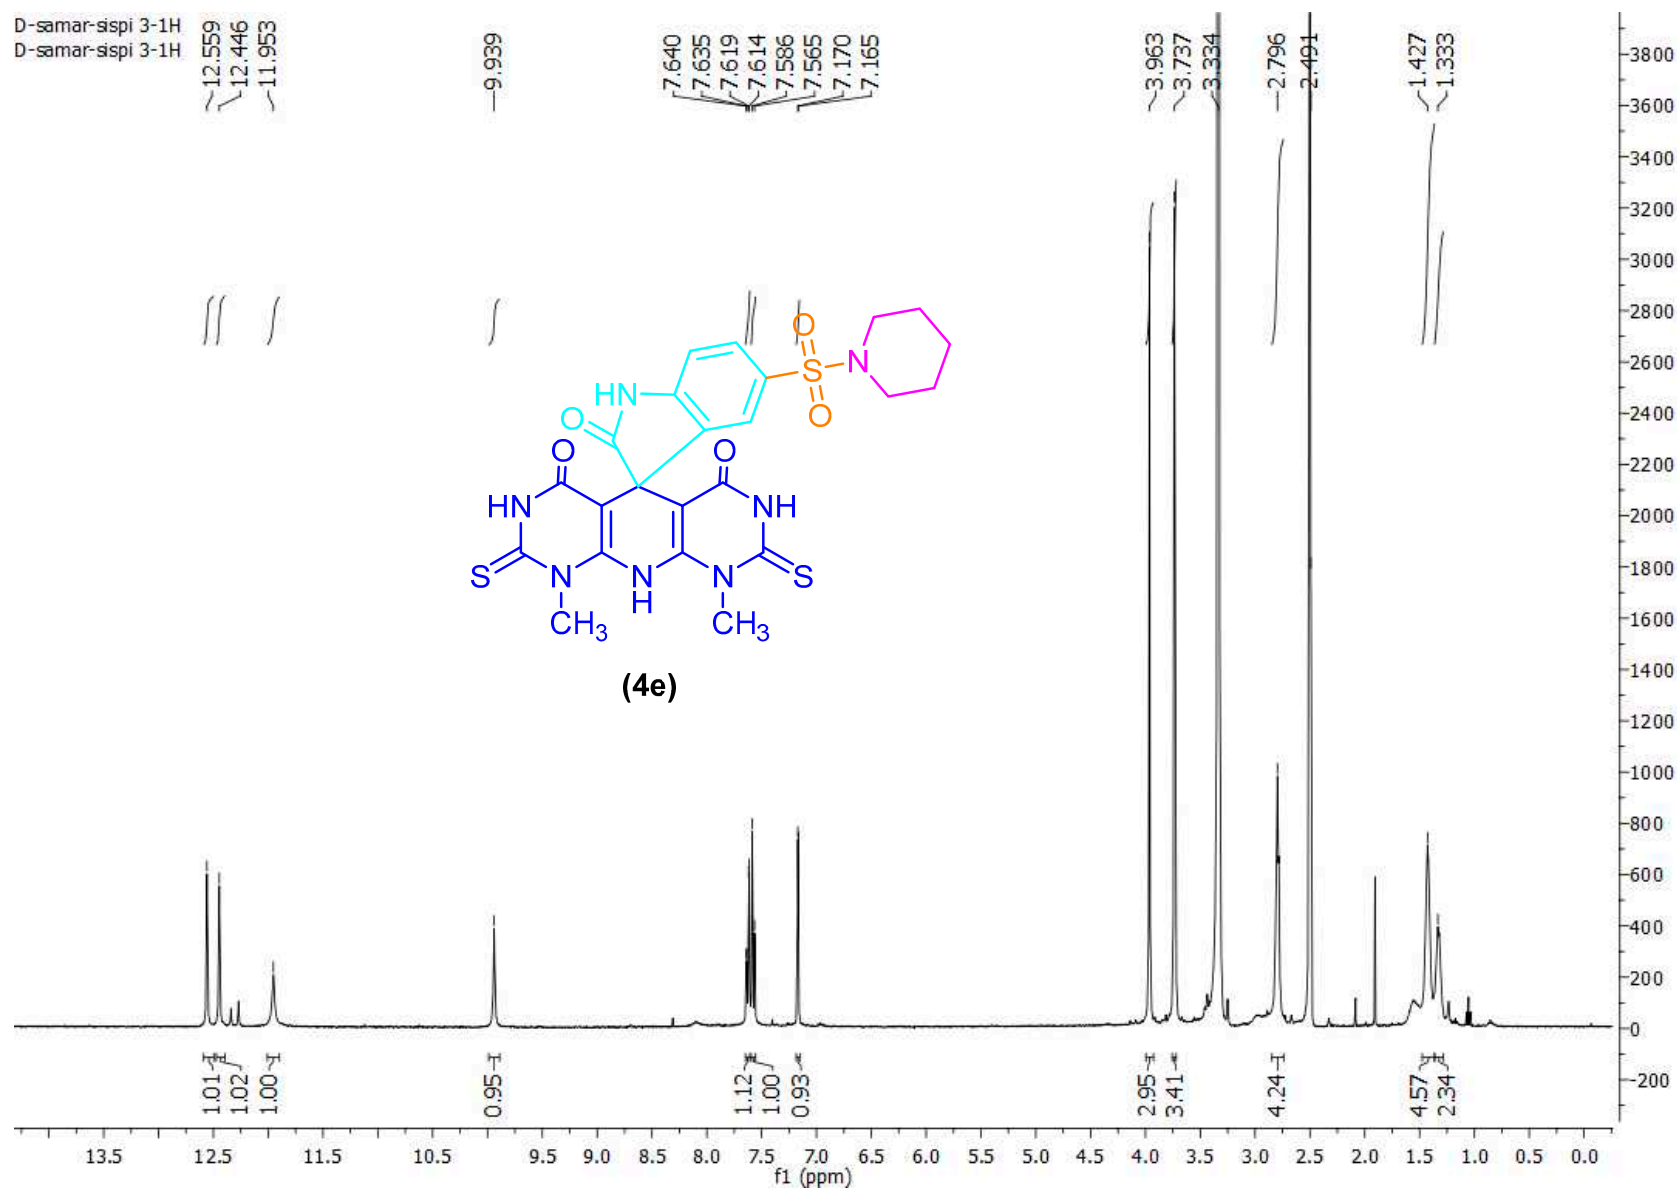



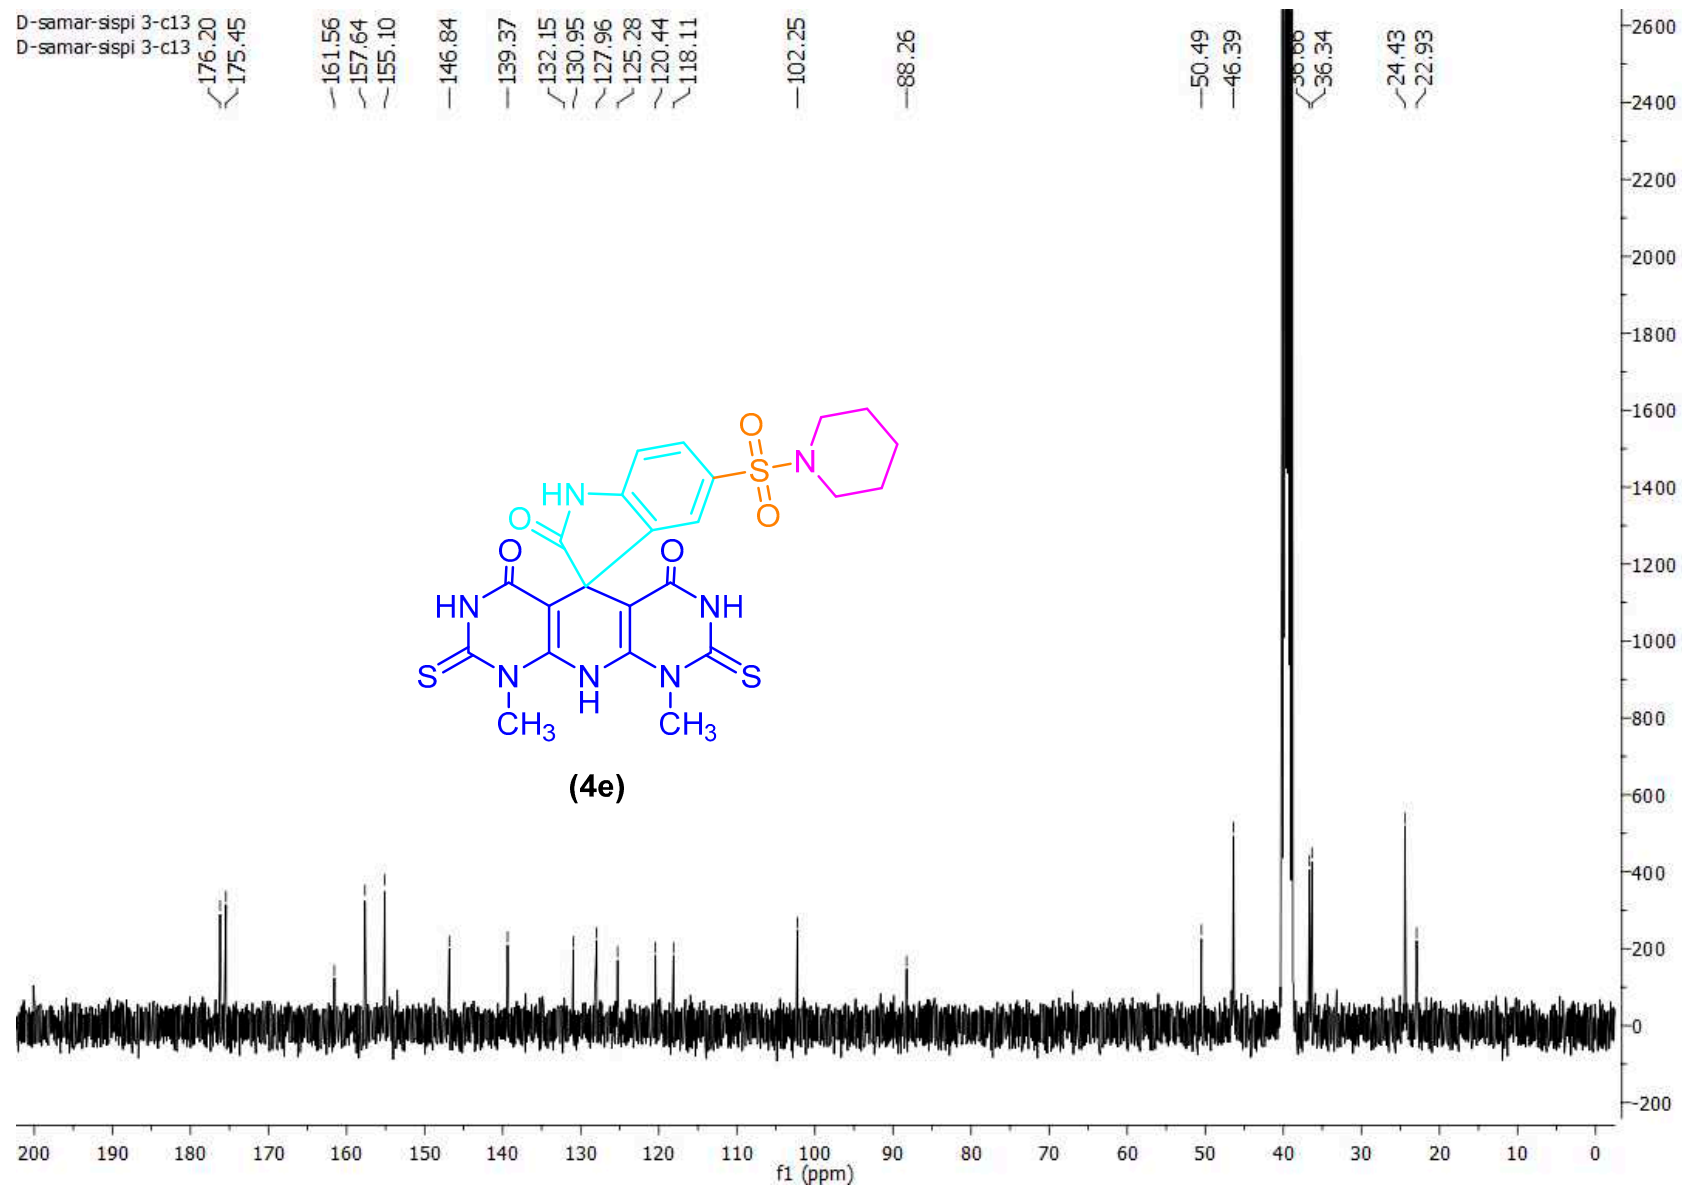

samar-Elkaliopy-sispi3 #269 RT: 4.52 AV: 1 SB: 2 4.45, 4.45 NL: 3.62E2  
T: {0,0} +c EI Full ms [40.00-1000.00]

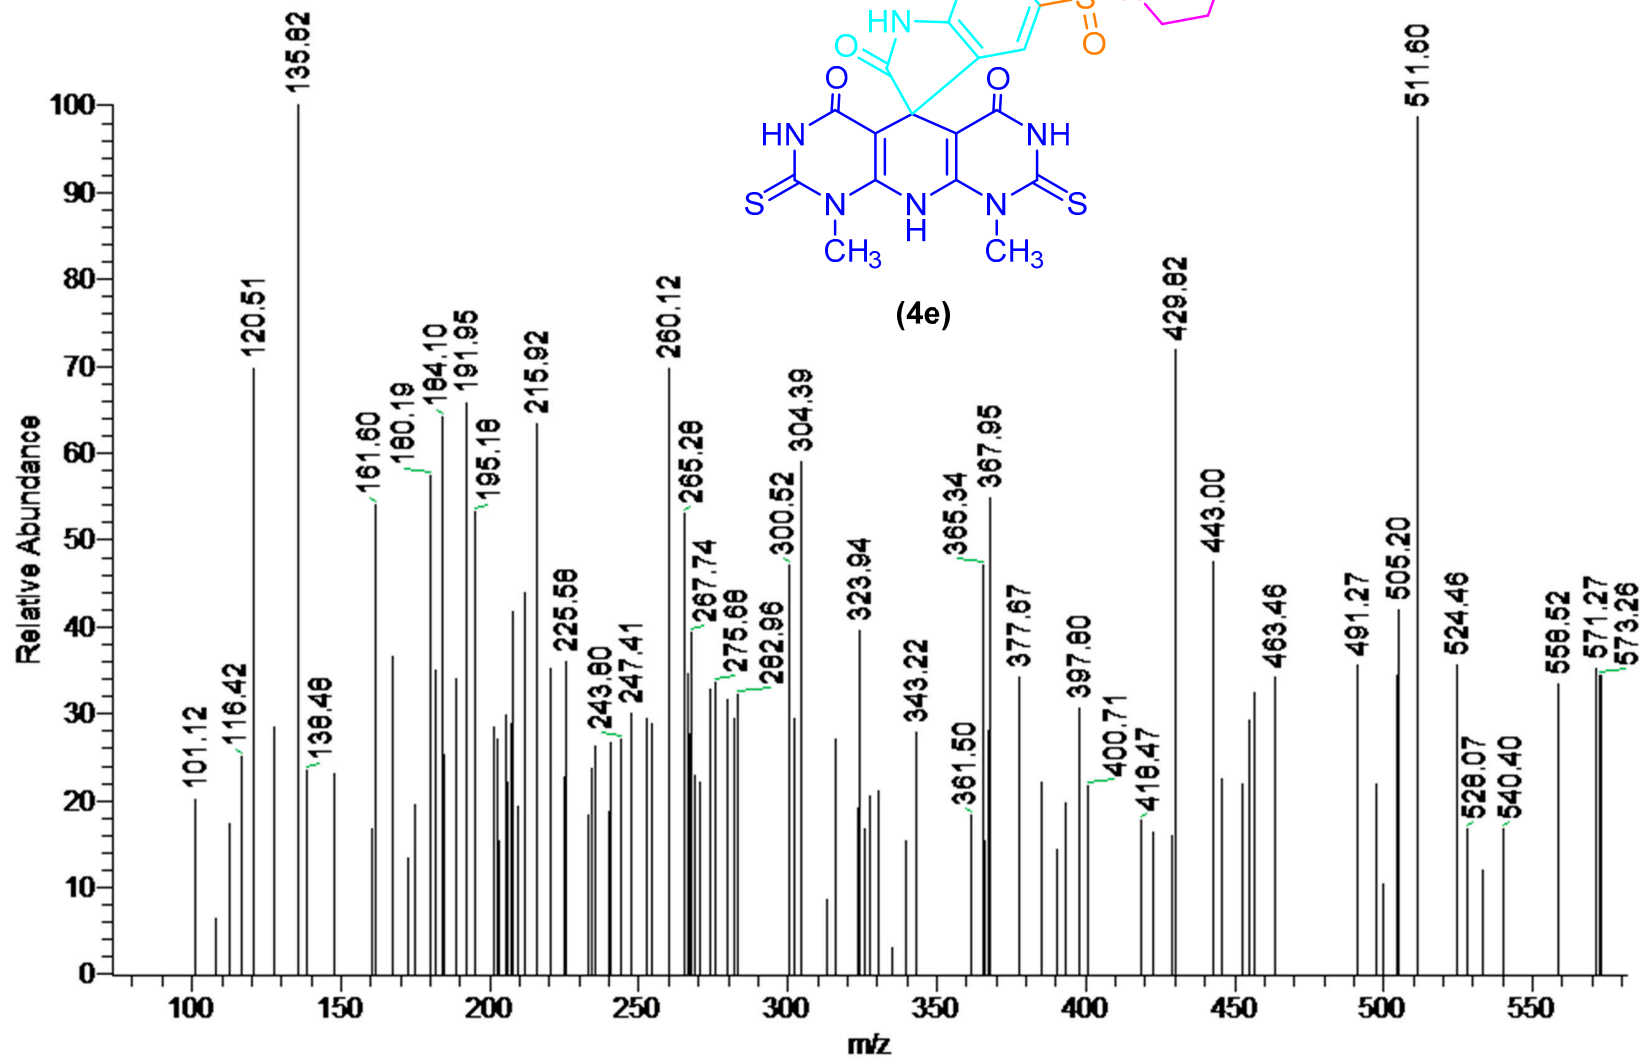

D-samar-sism 5 -1H  
D-samar-sism 5 -1H

—11.994

~11.257

~10.794

~10.591

—9.684

7.538

7.533

7.517

7.512

7.288

7.267

6.996

6.991

3.580

3.570

3.557

—2.722

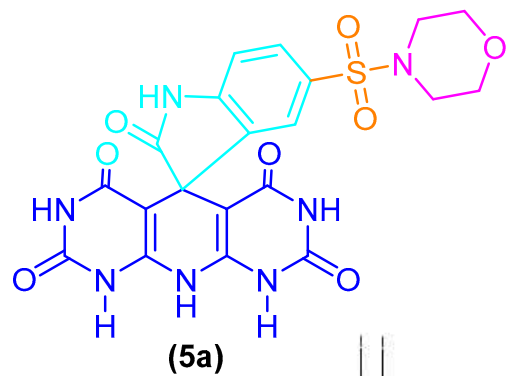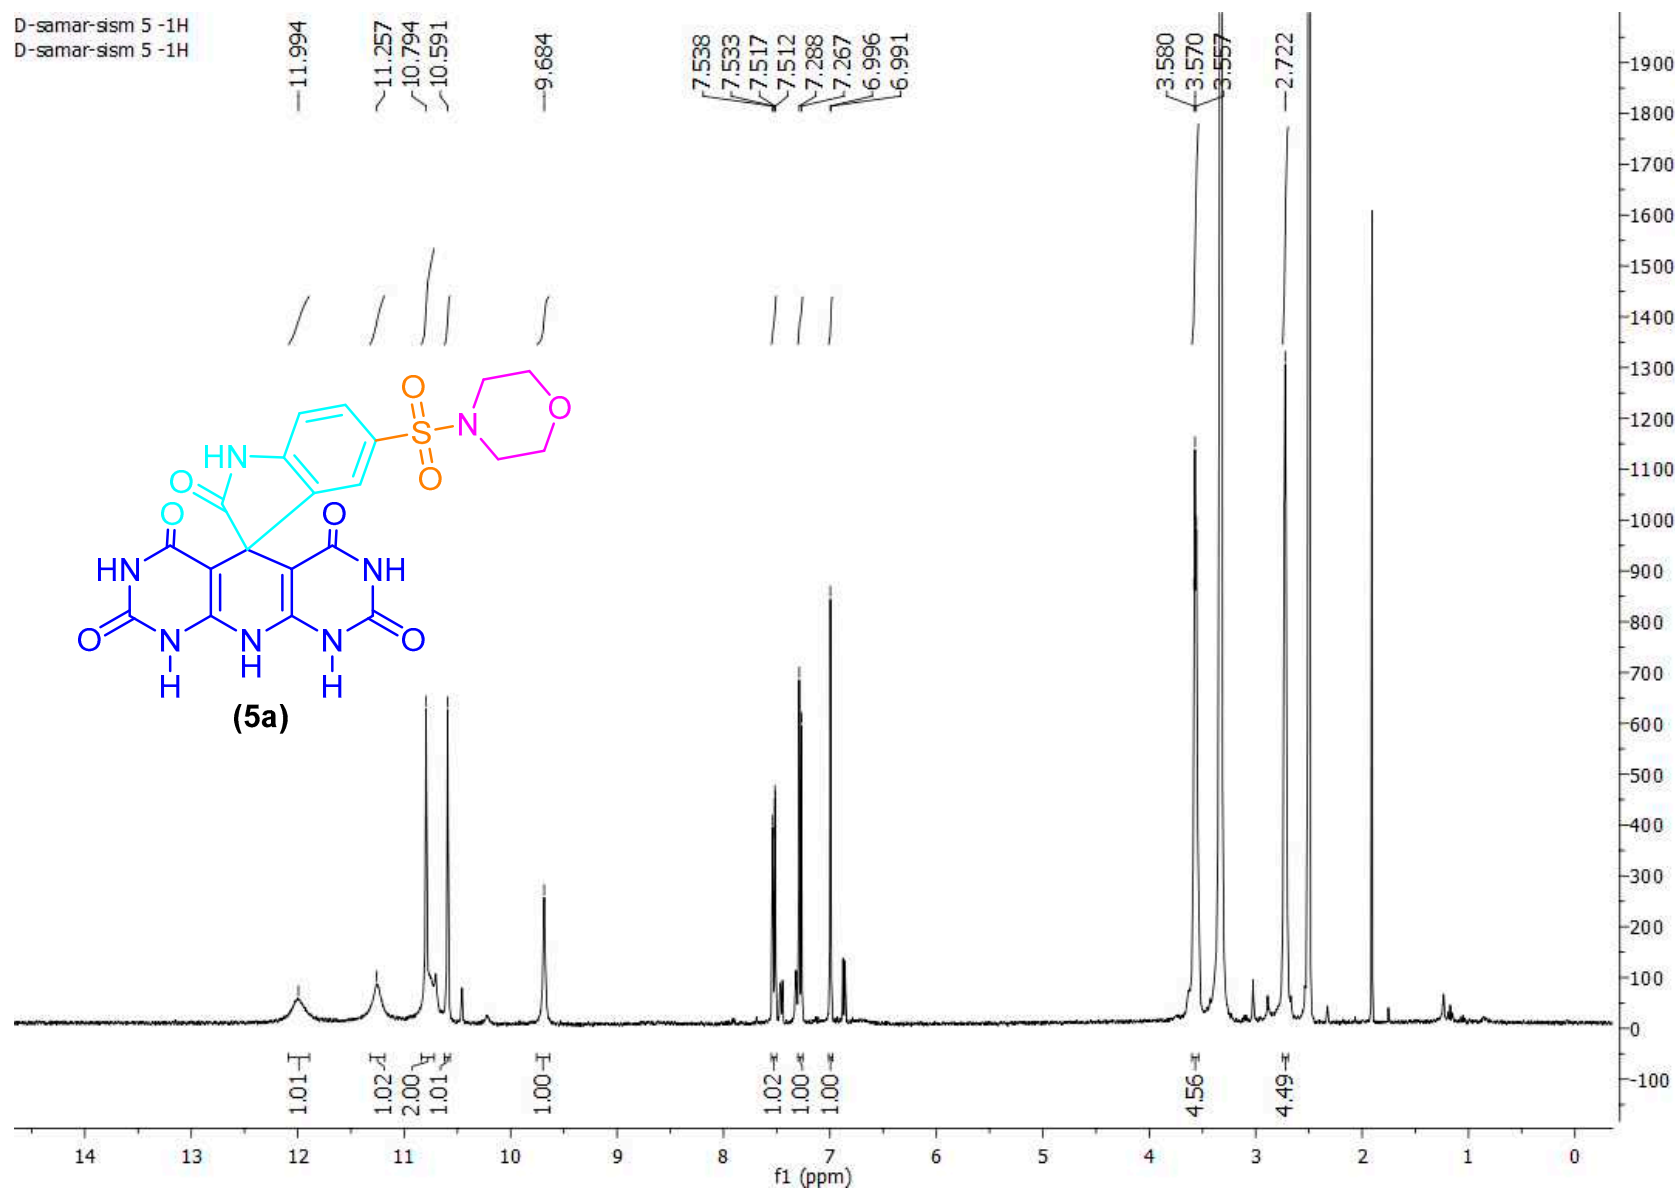

D-samar-sism 5 -c13  
D-samar-sism 5 -c13

—180.76

✓161.90

✓158.58

✓152.30

✓150.93

✓149.87

✓145.70

✓139.75

✓128.08

✓127.84

✓125.66

✓121.85

✓117.15

—97.26

—82.82

—65.17

✓49.01

✓45.64

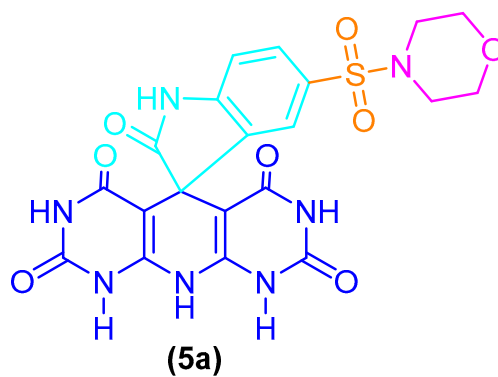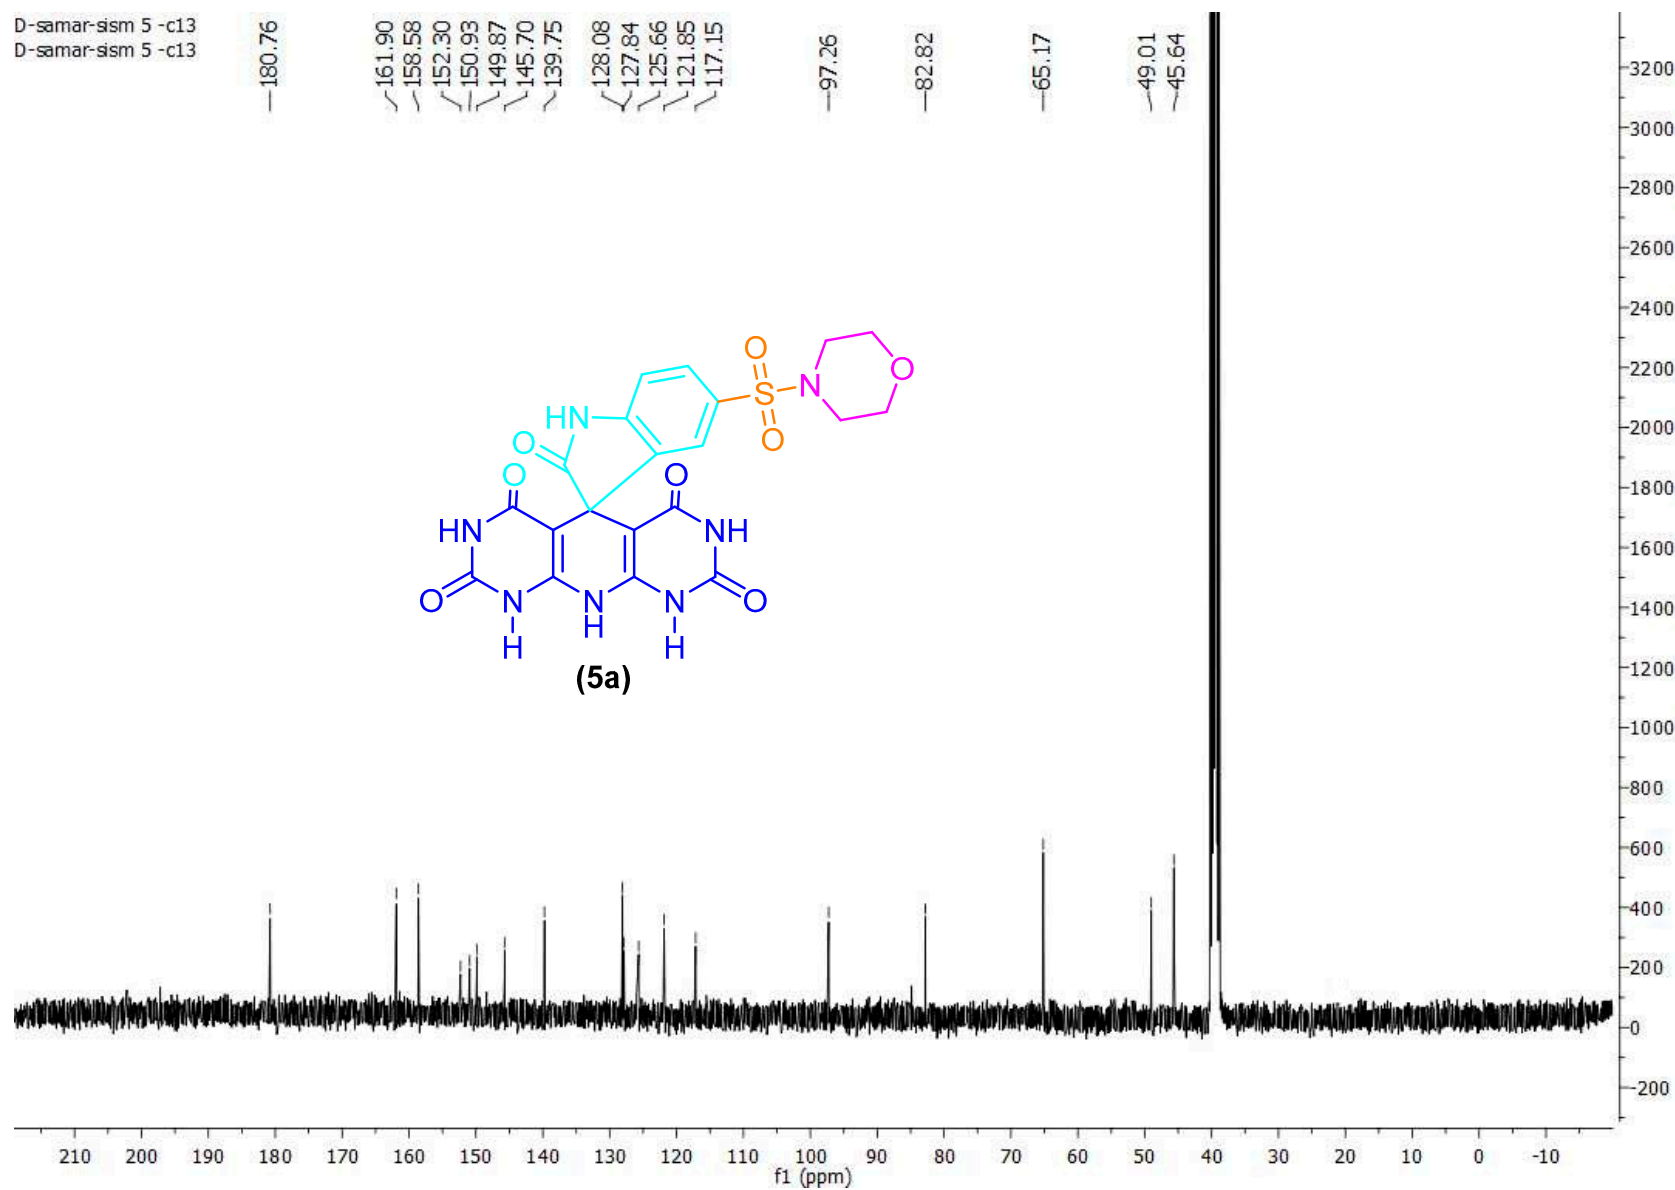

samar-Elkaliopy-sism5 #273 RT: 4.59 AV: 1 SB: 2 4.45, 4.45 NL: 6.12E2  
T: {0,0} + c EI Full ms [40.00-1000.00]

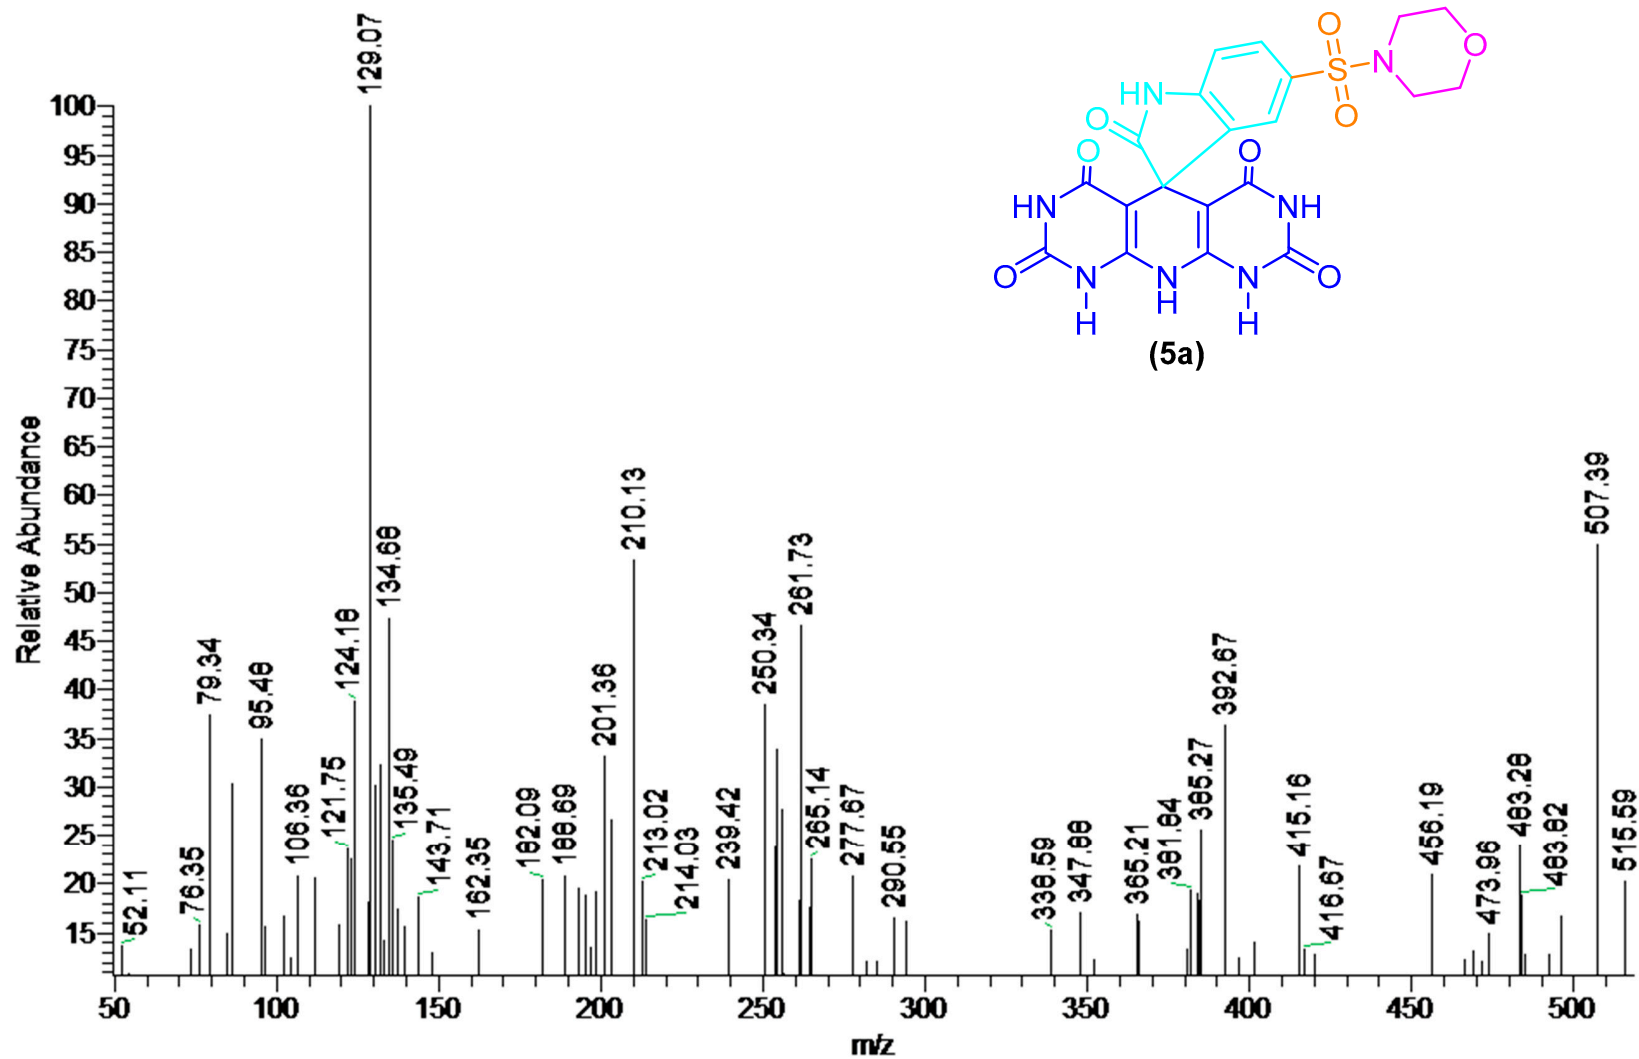

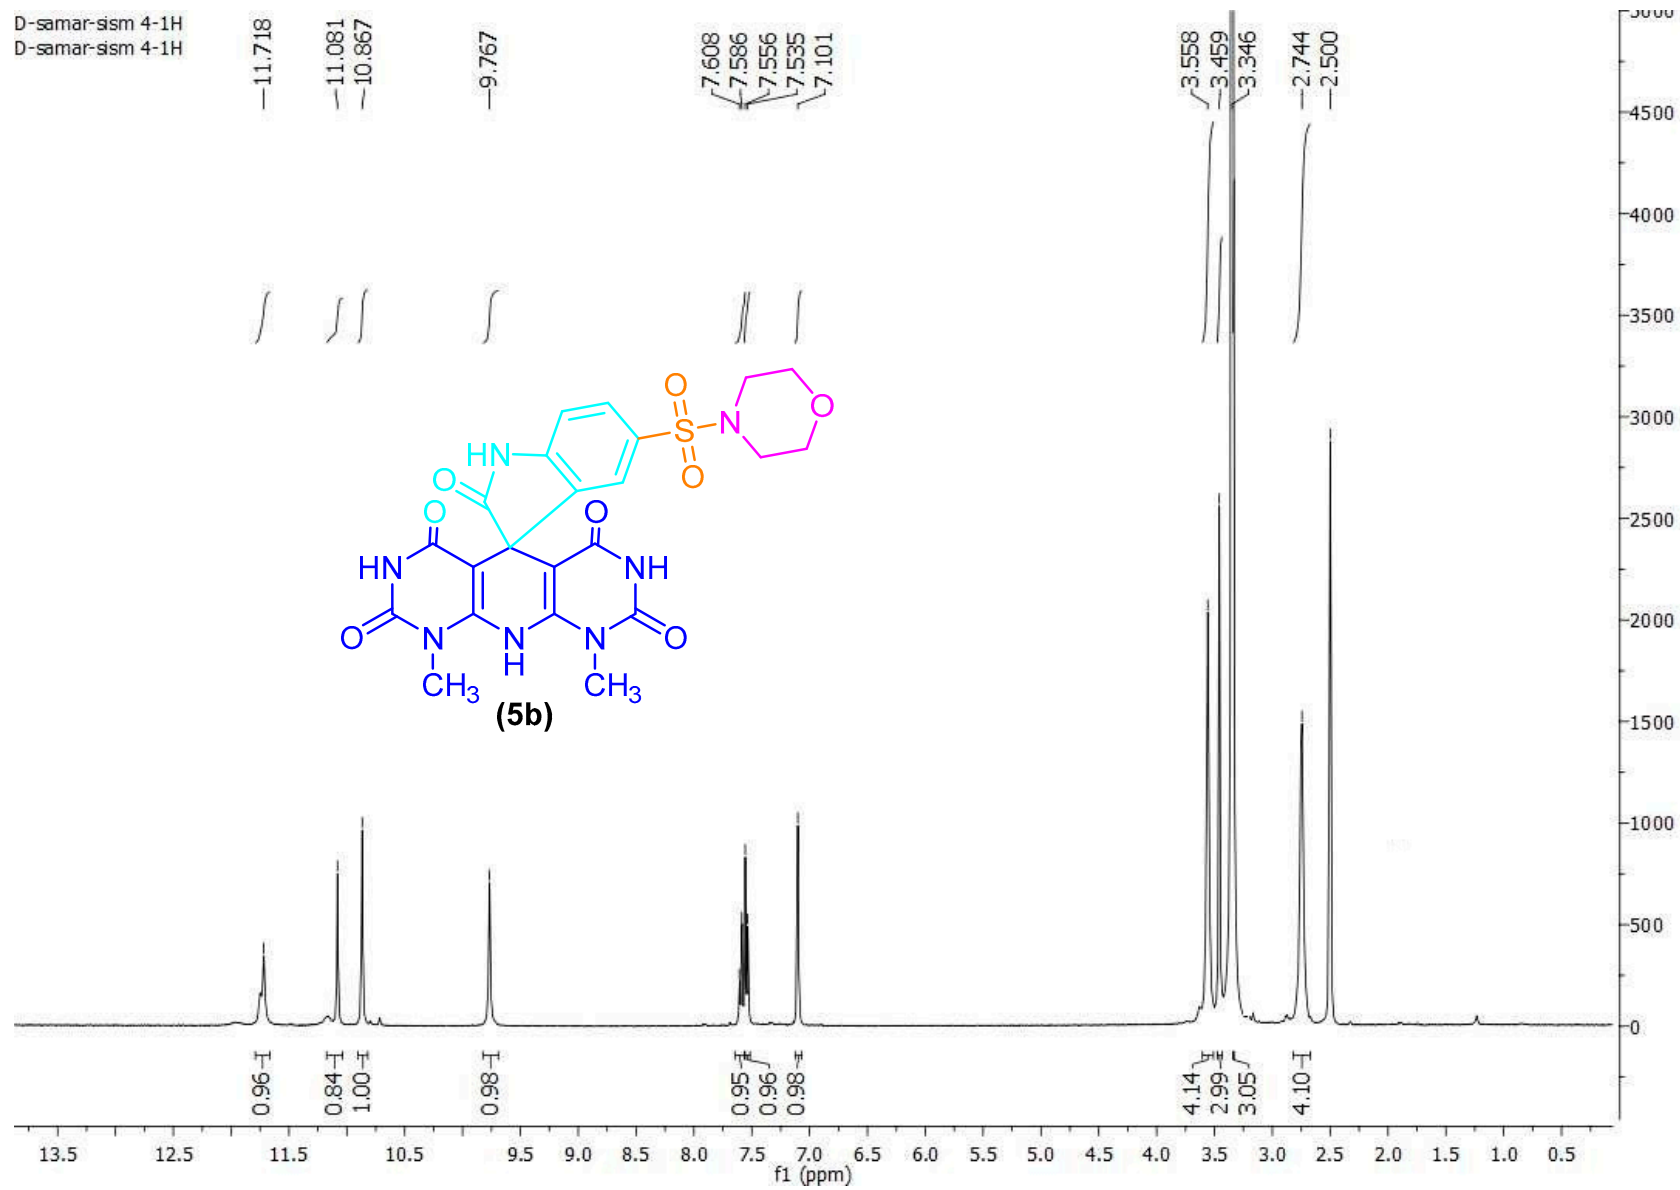

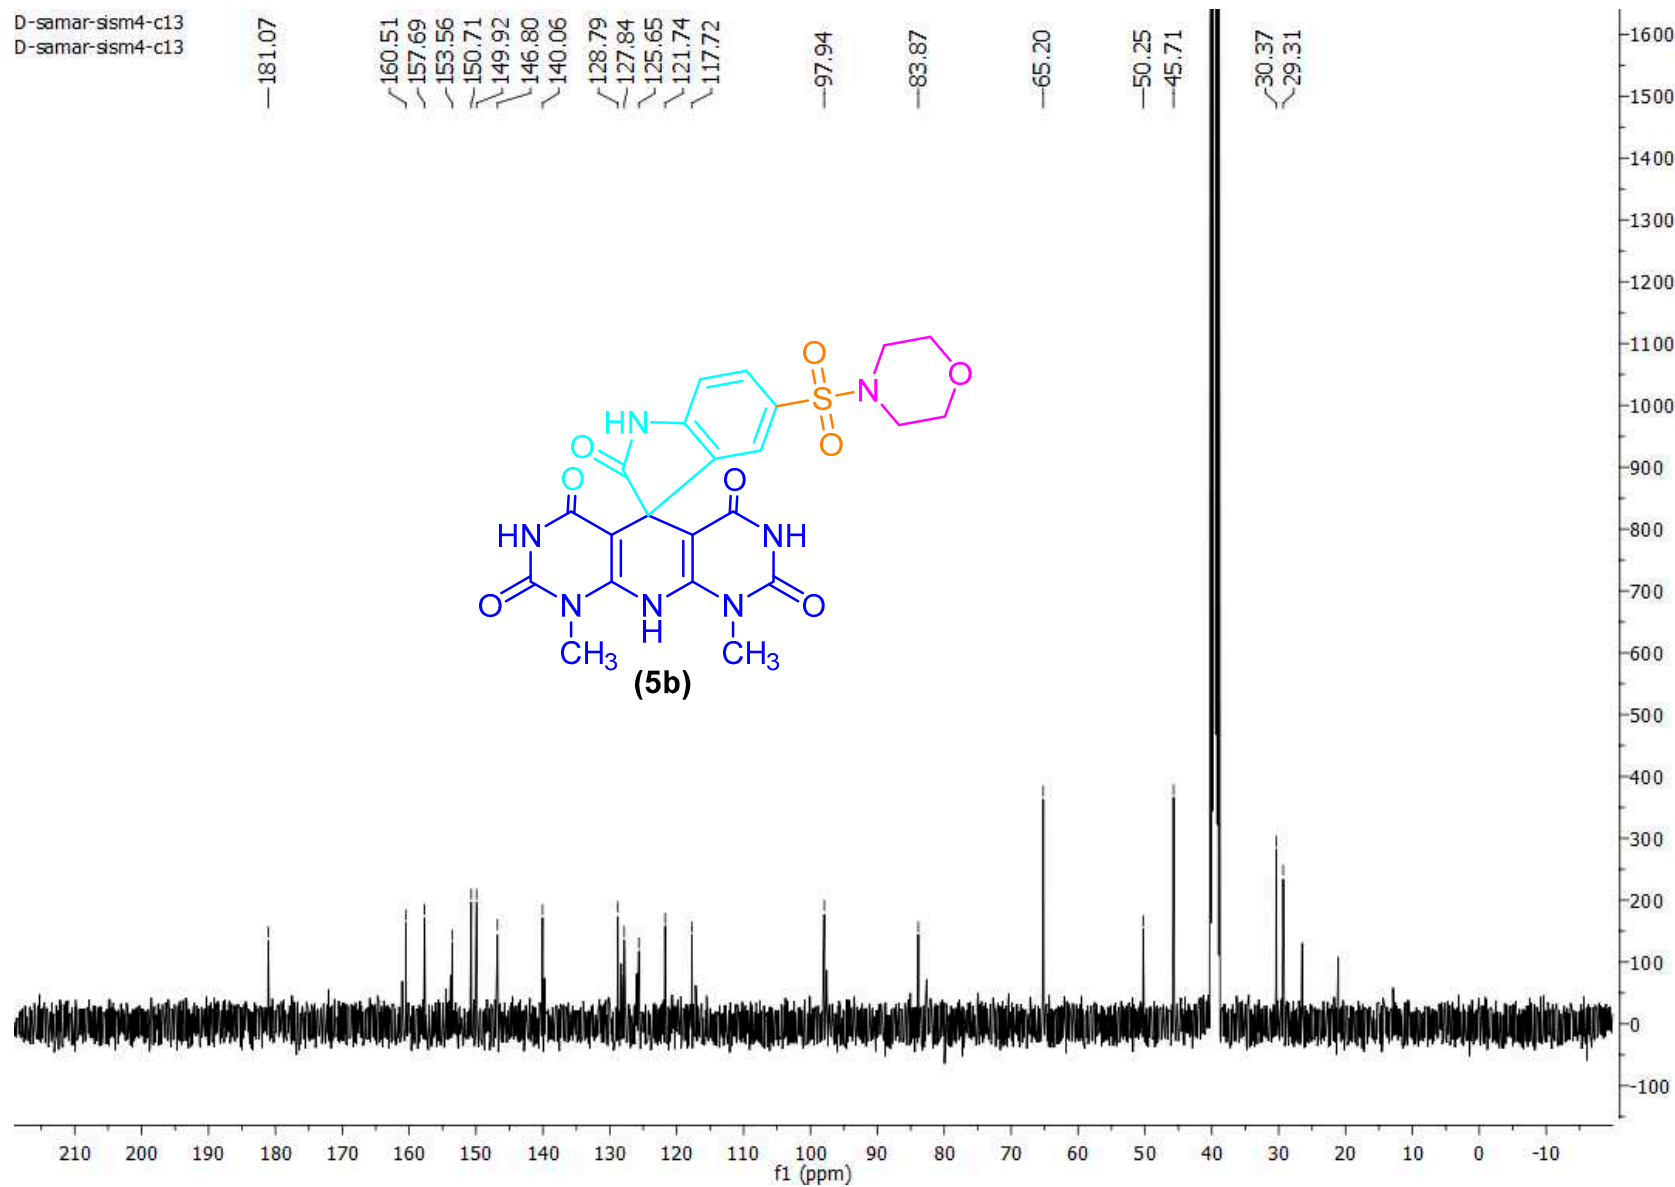

samar-Elkaliopy-sism4 #266 RT: 4.47 AV: 1 SB: 2 4.45, 4.45 NL: 3.99E2  
T: {0,0} + c EI Full ms [40.00-1000.00]

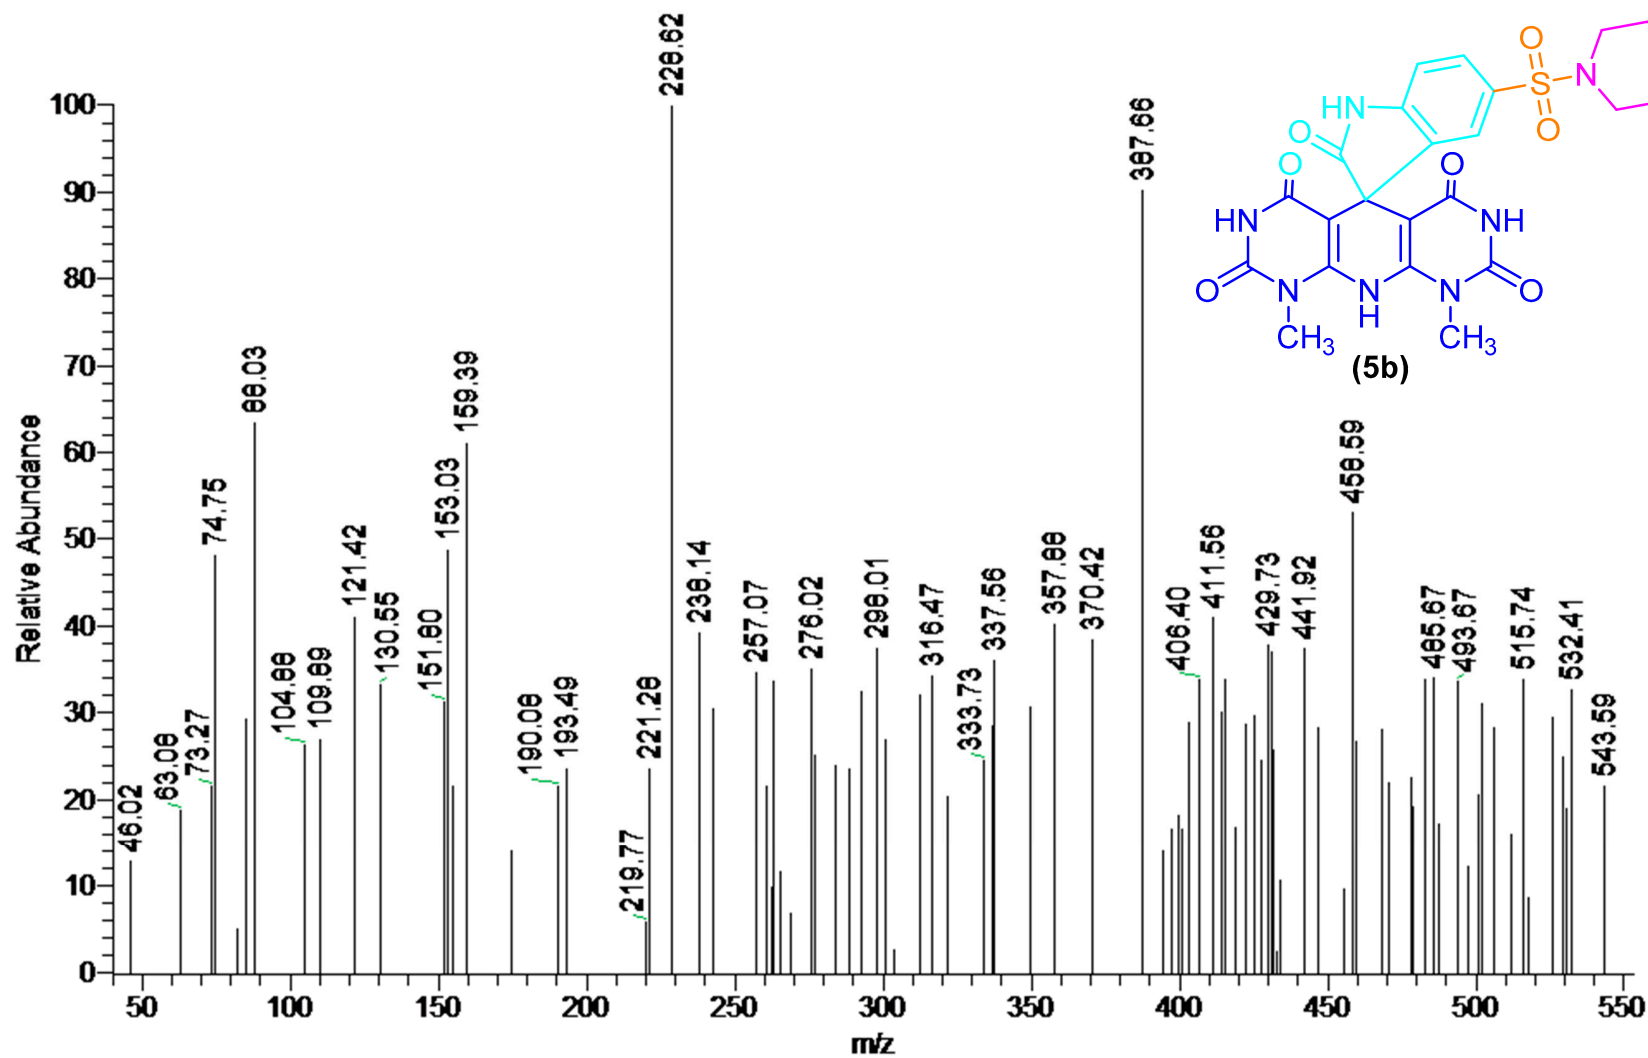



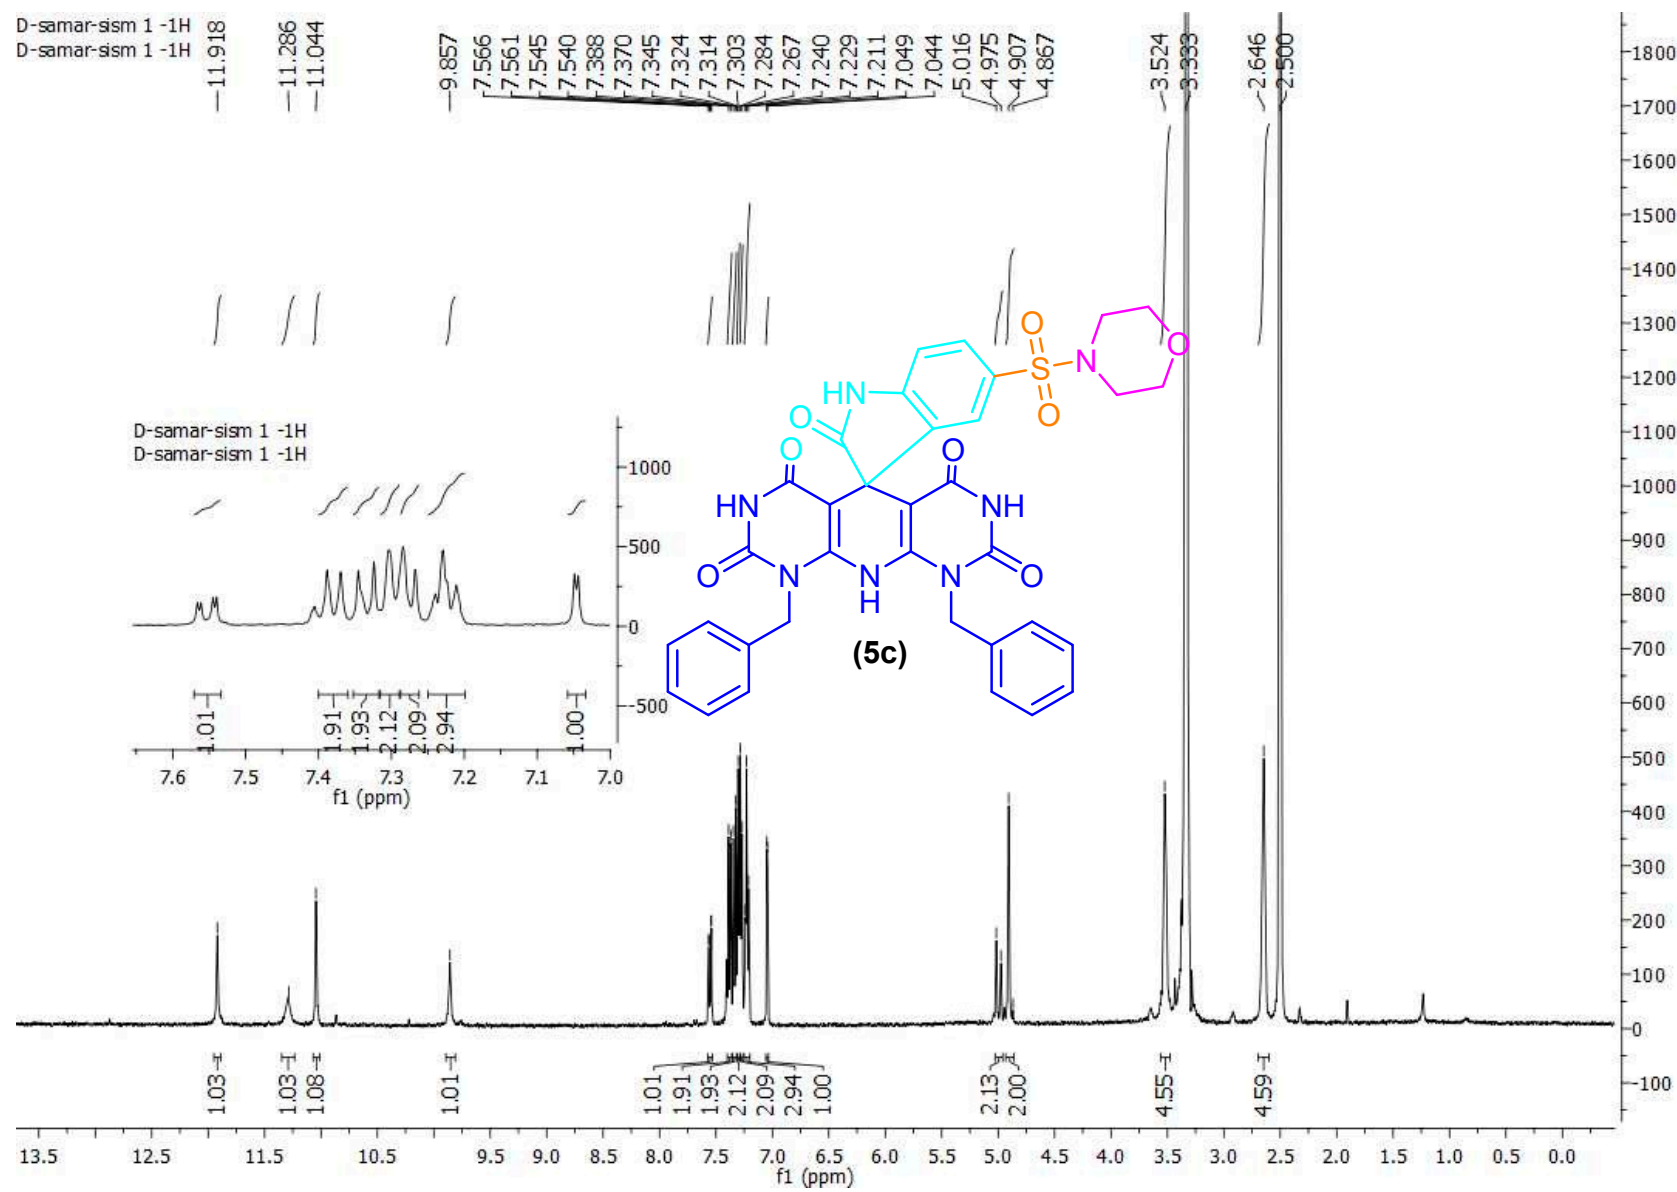

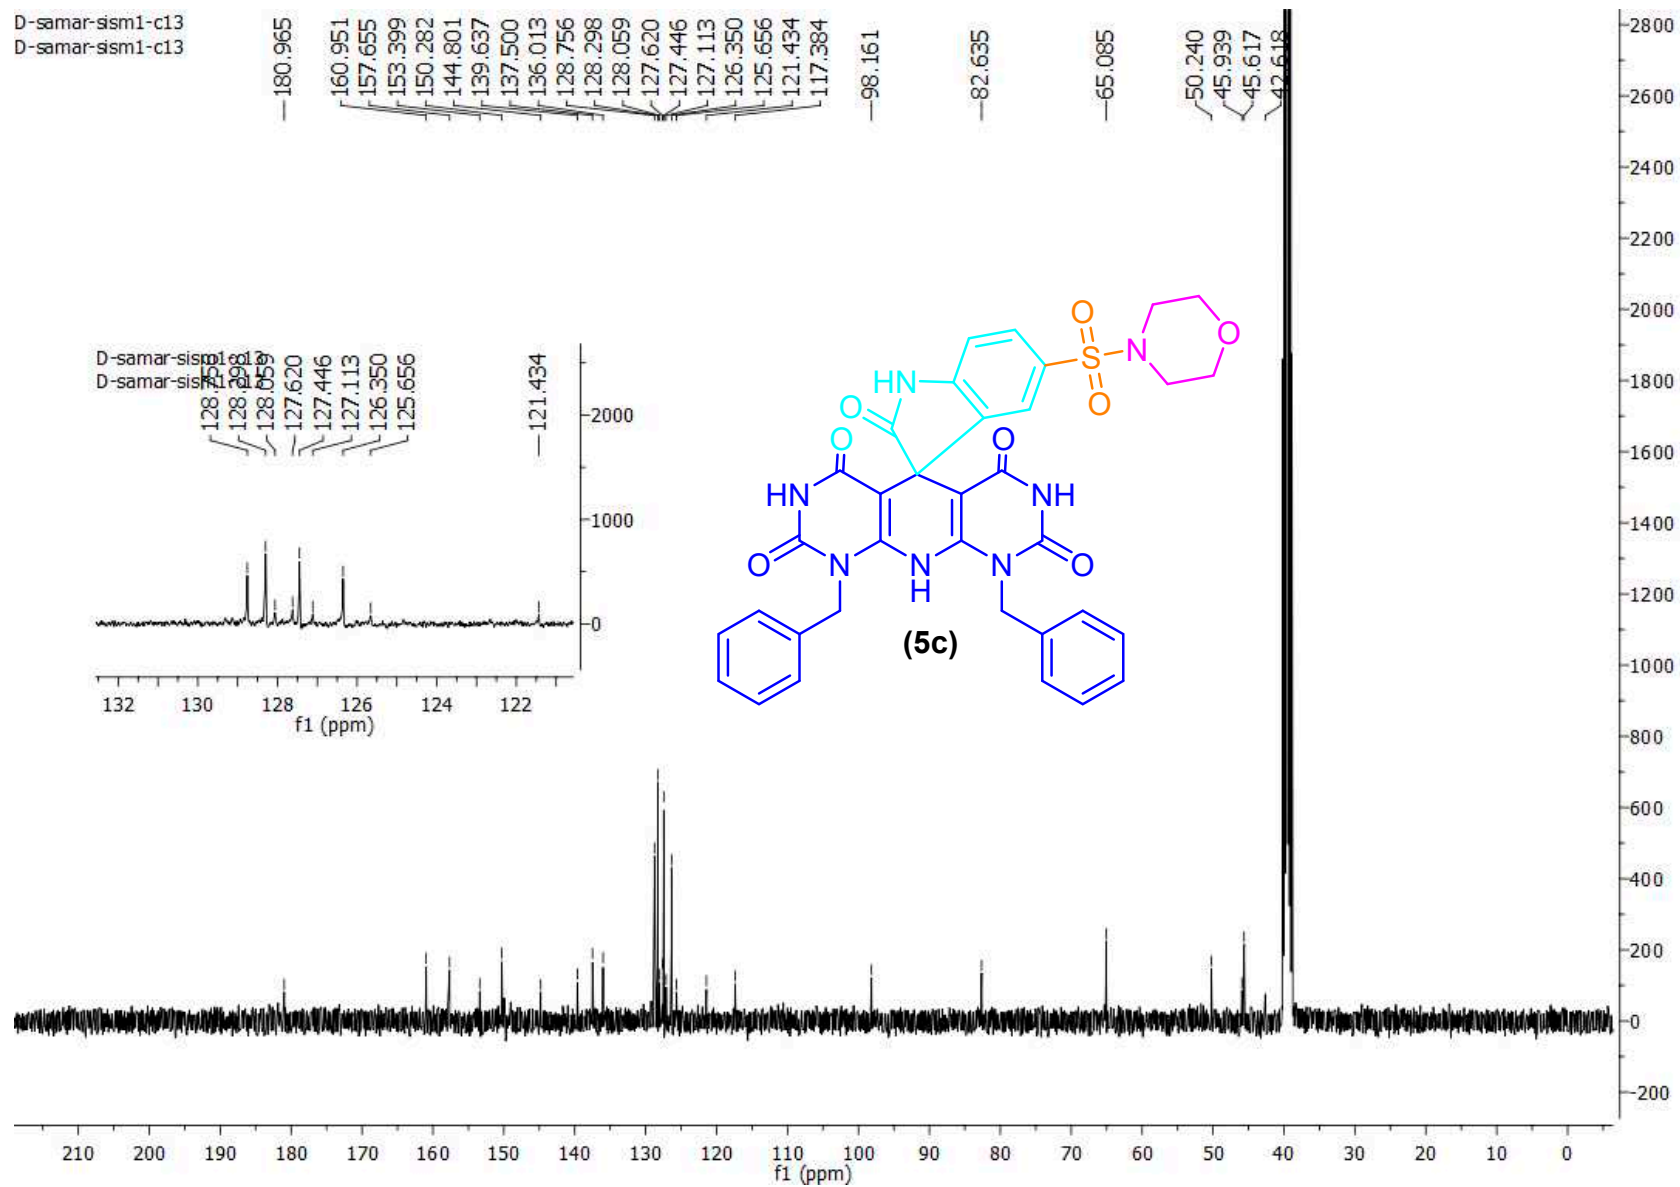

samar-Elkaliopy-sism1 #150 RT: 2.53 AV: 1 SB: 2 4.45, 4.45 NL: 4.01E2  
T: {0.0} + c EI Full ms [40.00-1000.00]

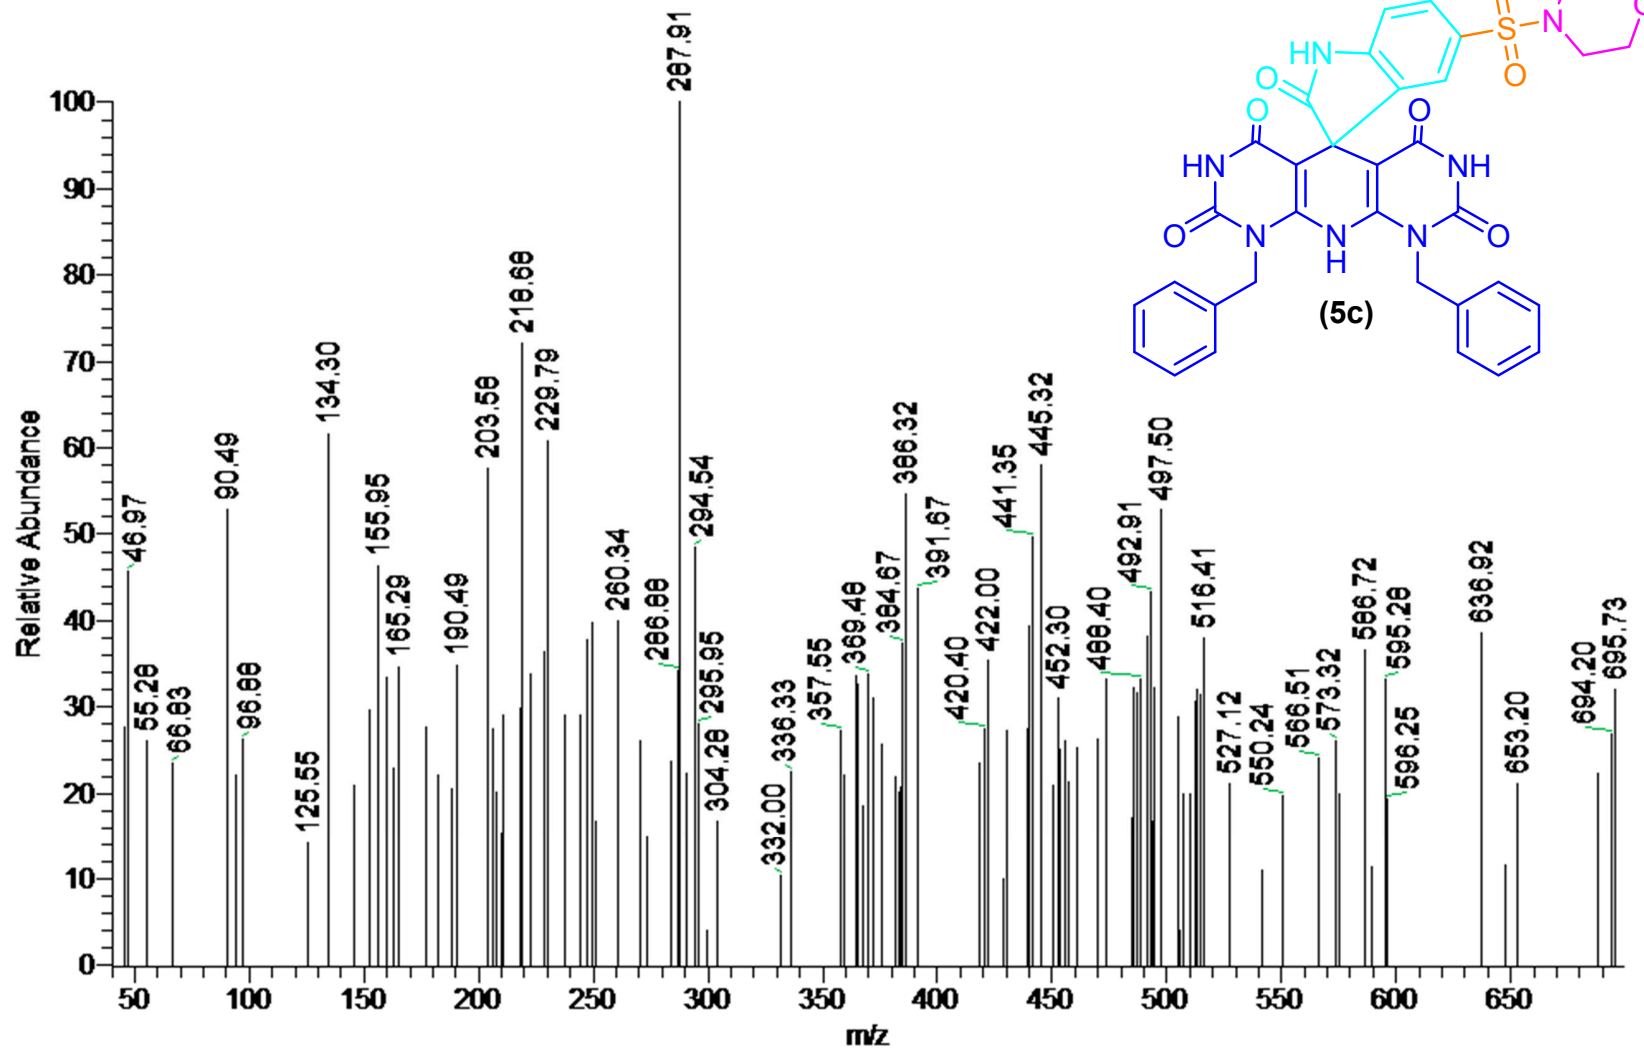

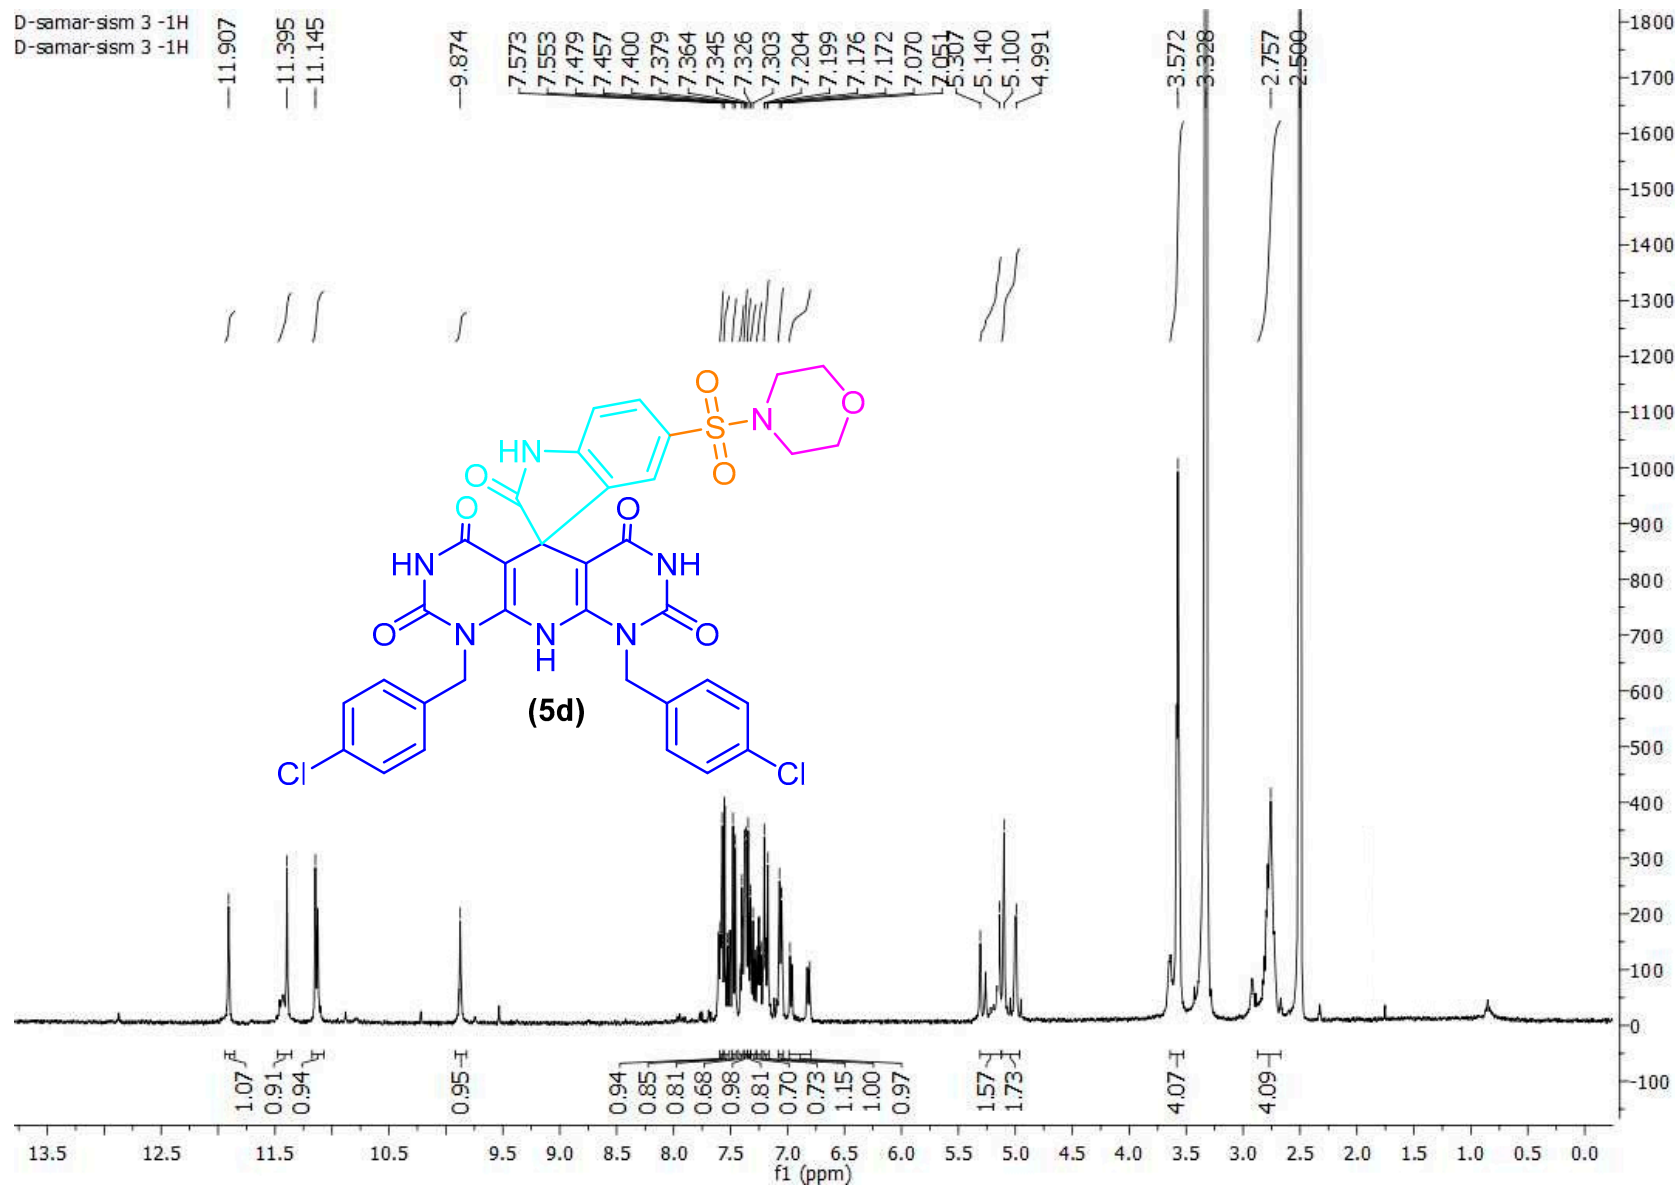

D-samar-sism3-c13  
D-samar-sism3-c13

180.98  
160.76  
157.87  
157.72  
150.15  
149.56  
146.77  
134.31  
133.94  
133.45  
133.31  
131.68  
131.57  
129.57  
129.33  
129.05  
128.48  
127.21  
126.21  
125.67  
98.57

83.98

65.18

50.31

45.67

44.66

43.08

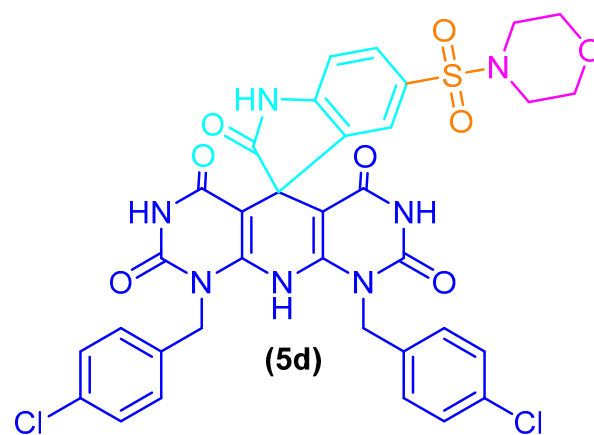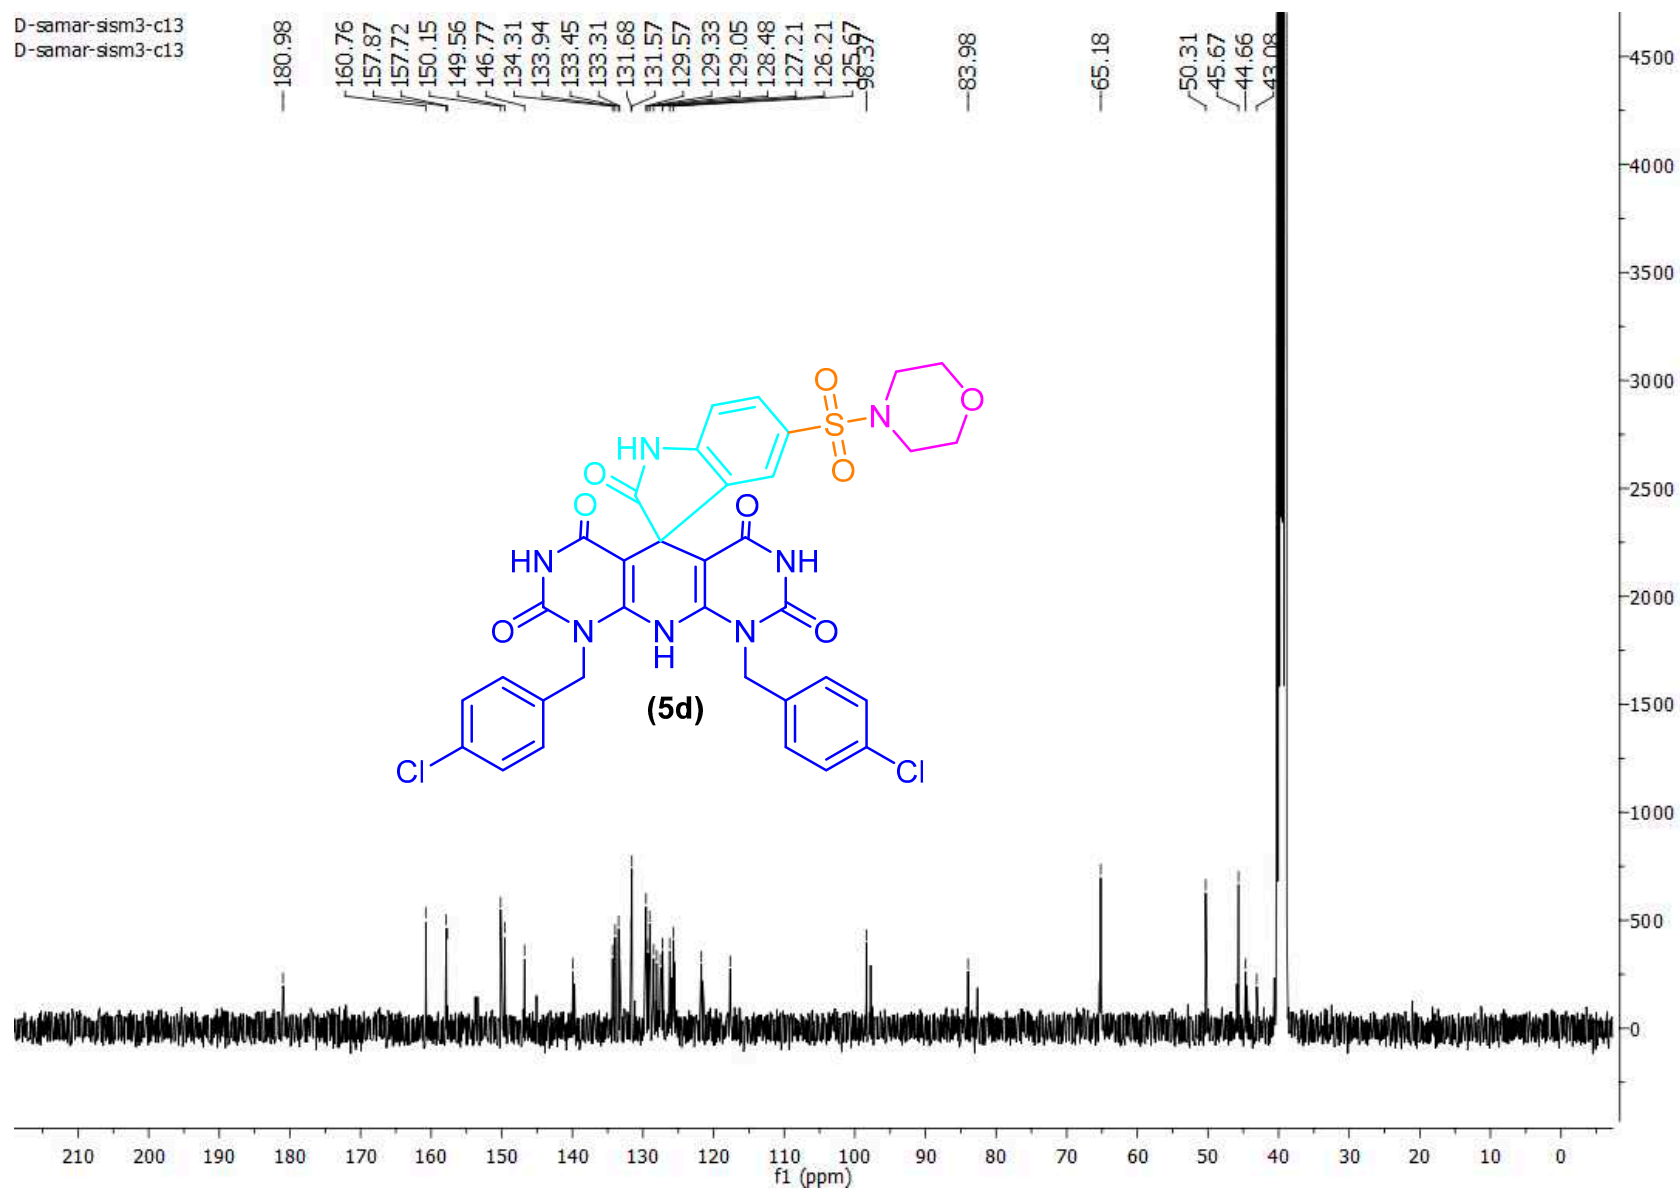

samar-Elkaliopy-sis-m-3 #46 RT: 0.79 AV: 1 SB: 2 4.45, 4.45 NL: 5.08E2  
T: {0,0} + c EI Full ms [40.00-1000.00]

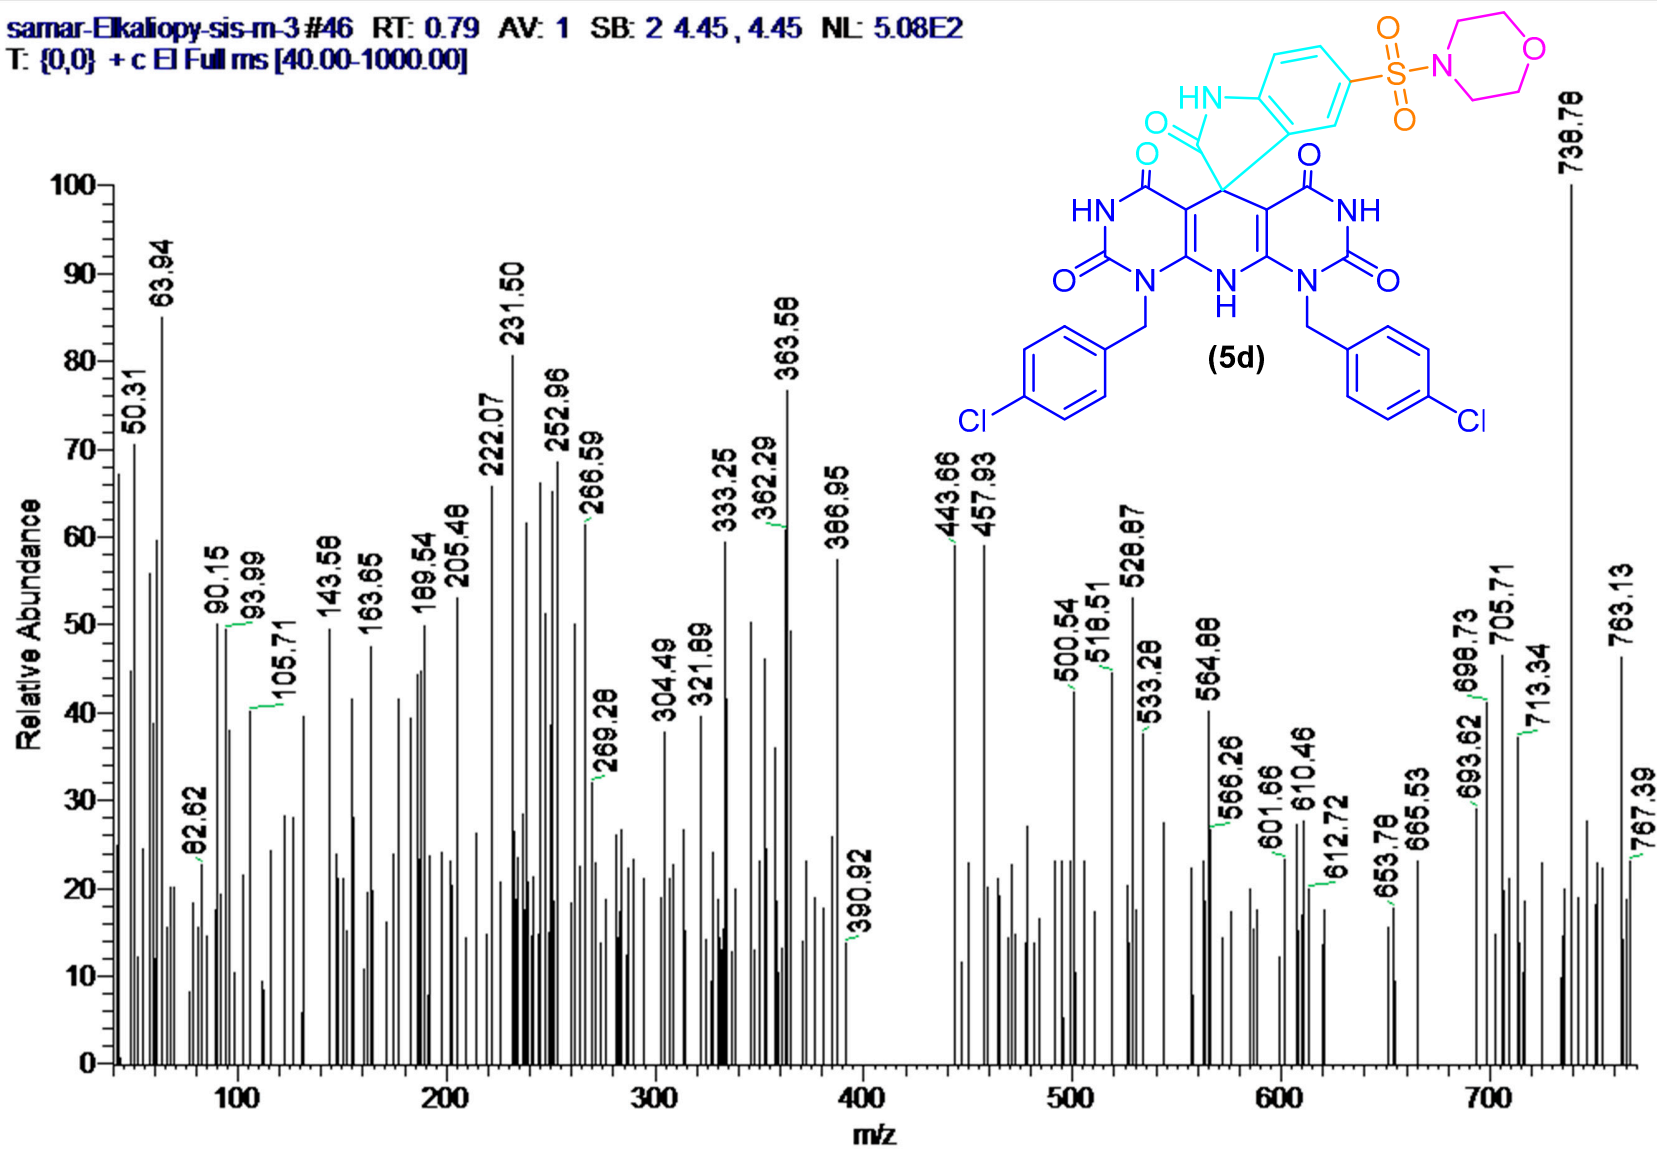

D-samar-sism 2 -1H  
D-samar-sism 2 -1H

12.566  
12.444  
11.957

9.976

7.658  
7.654  
7.636  
7.632  
7.623  
7.601

3.968  
3.735  
3.331

2.500

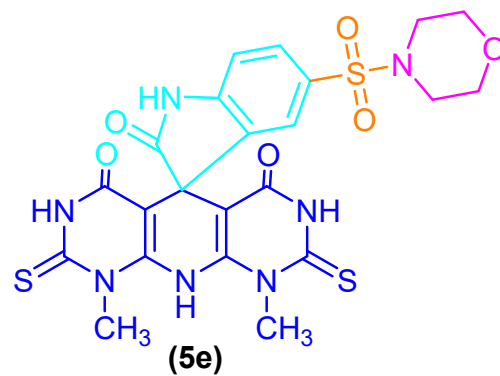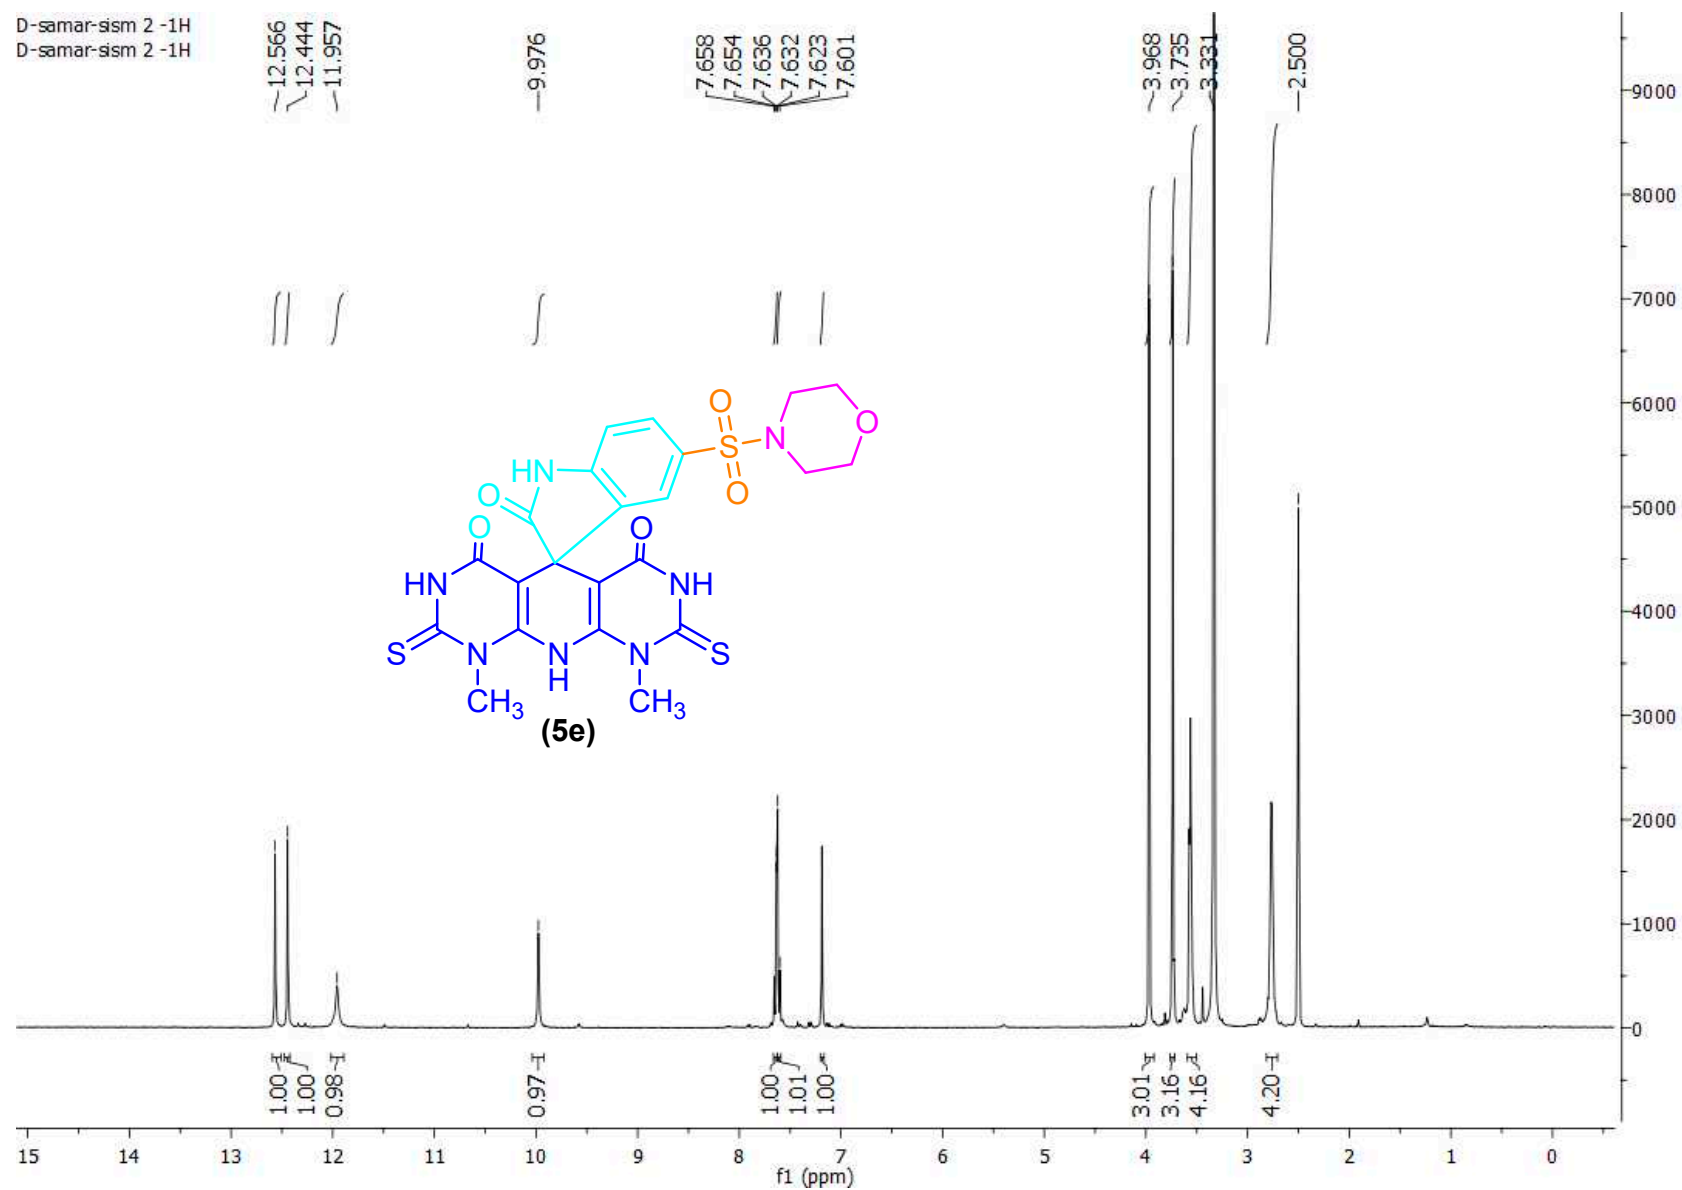

D-samar-sism 2 -c13  
D-samar-sism 2 -c13

180.07  
176.20  
175.44

157.61  
155.11  
153.60  
146.82  
139.77

129.42  
128.23  
125.65  
120.55  
118.24

102.04

88.32

65.17

50.48  
45.71

36.69  
36.35

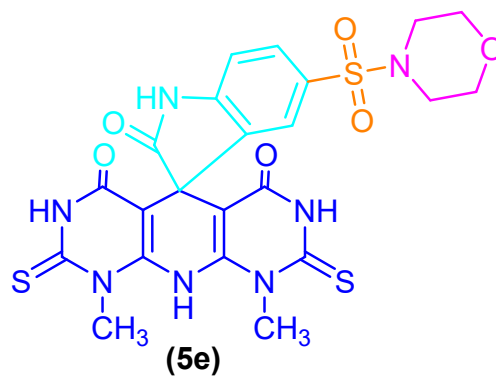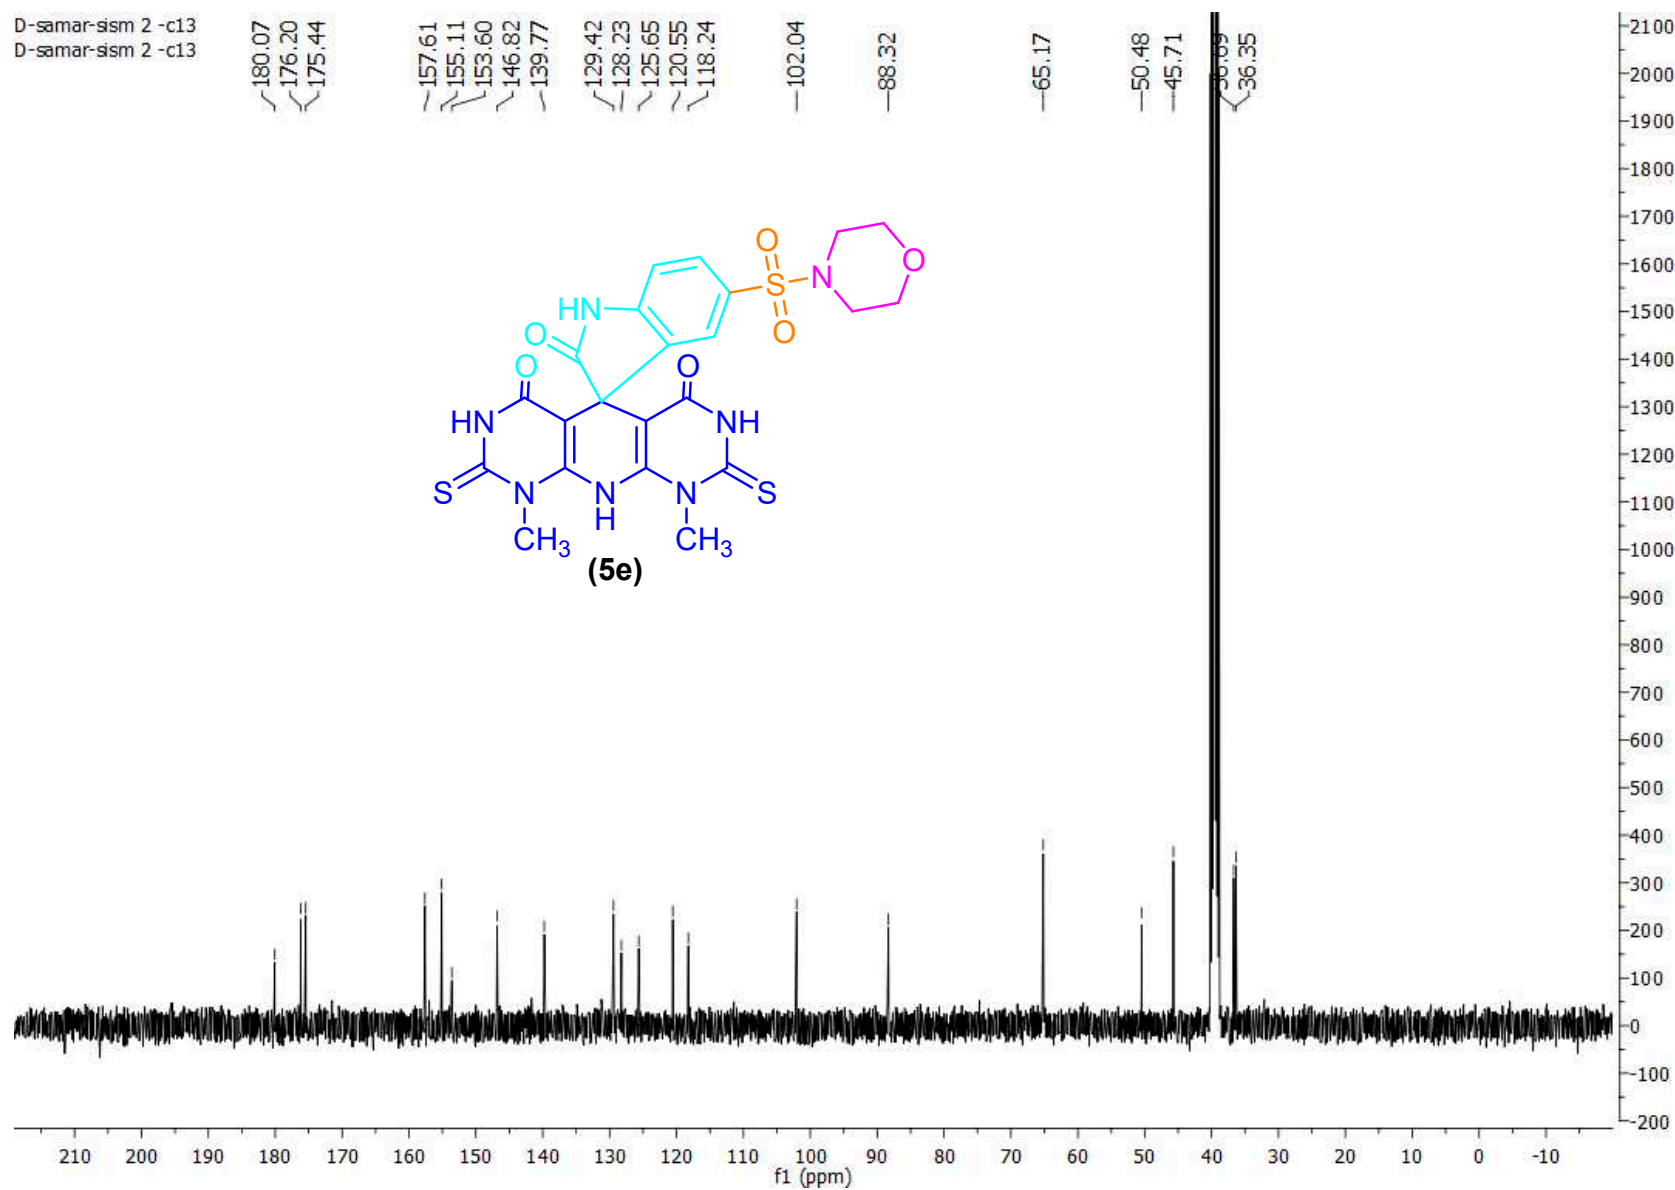



samar-Ekaliopy-sism2 #254 RT: 4.27 AV: 1 SB: 2 4.45, 4.45 NL: 3.27E2  
T: {0,0} + c EI Full ms [40.00-1000.00]

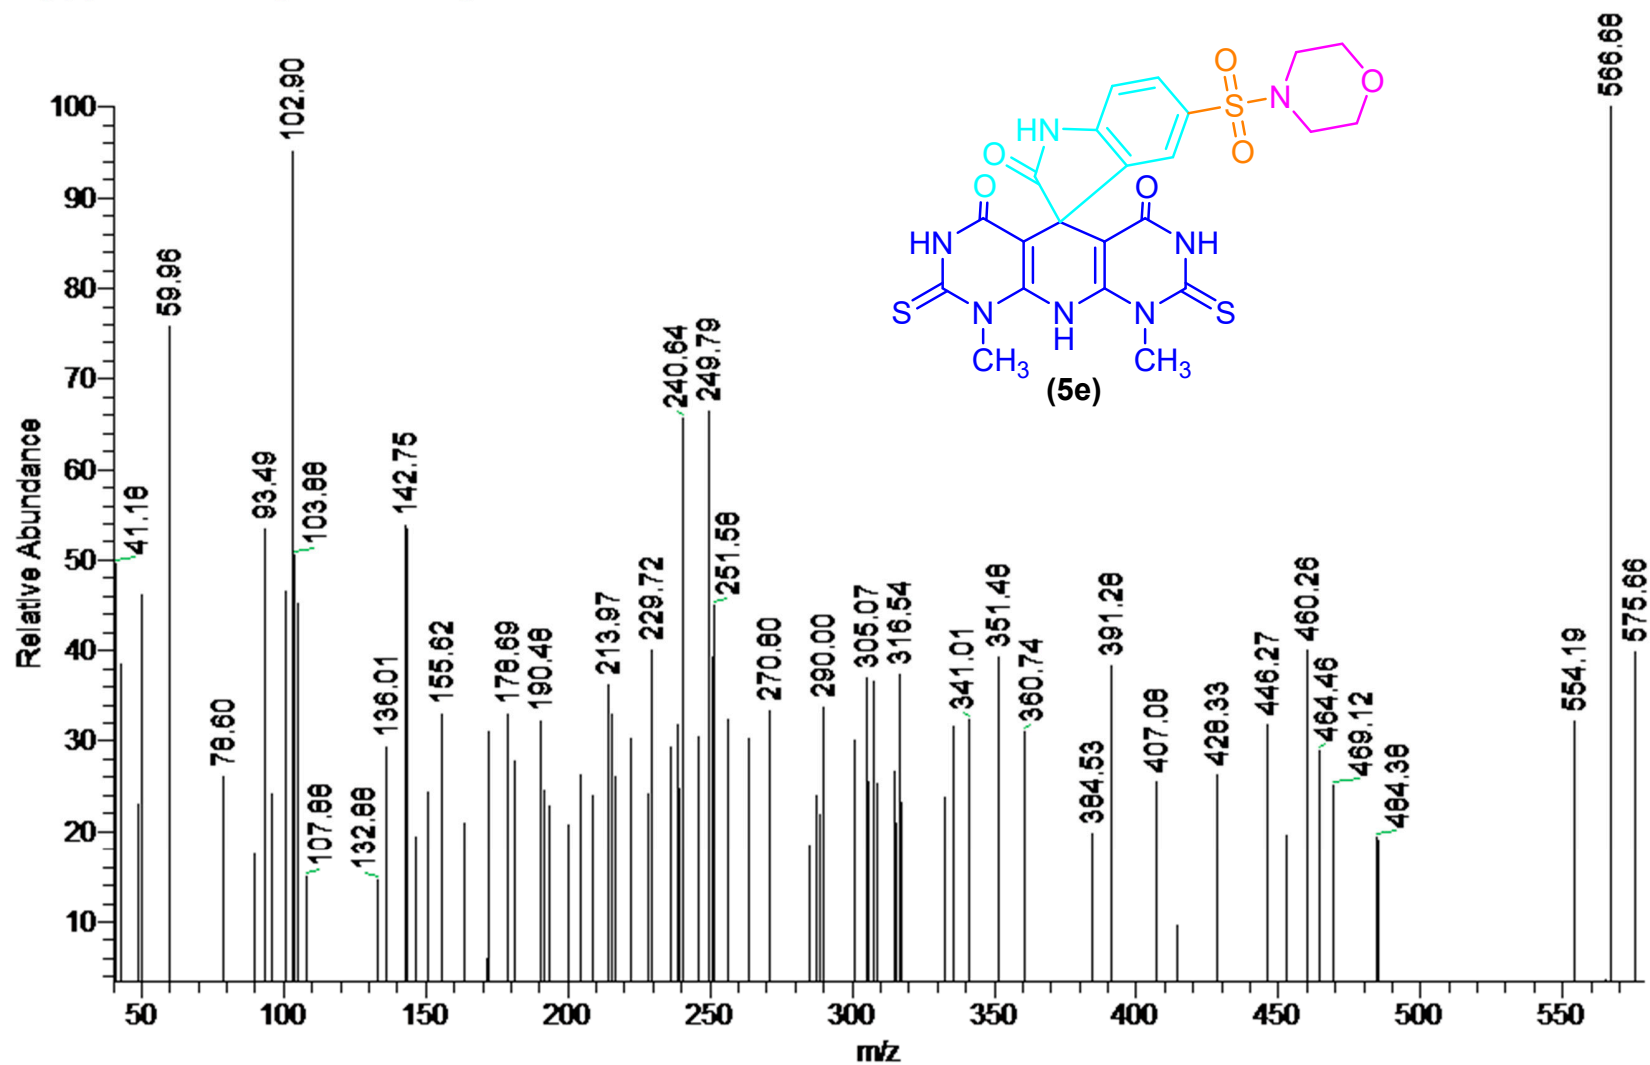

## IC<sub>50</sub> graphs

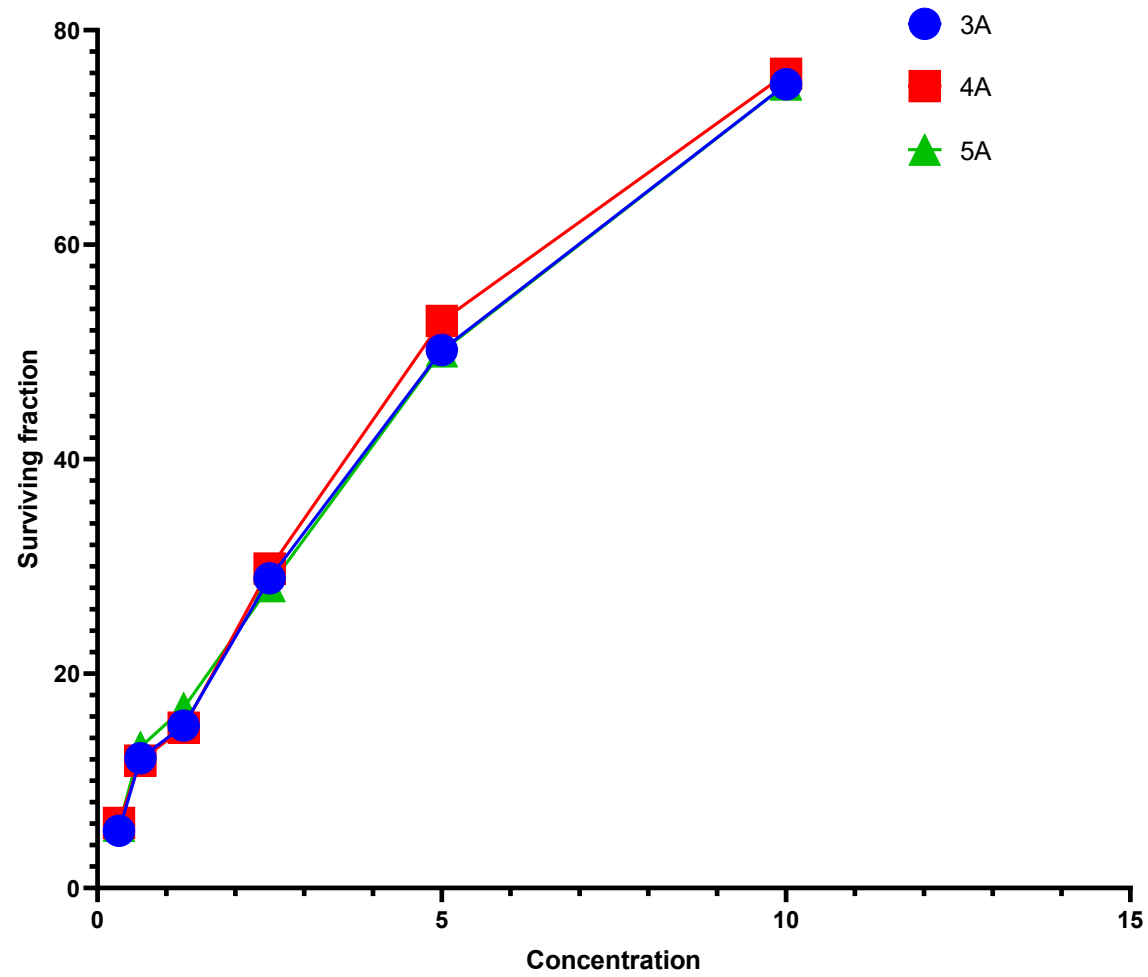

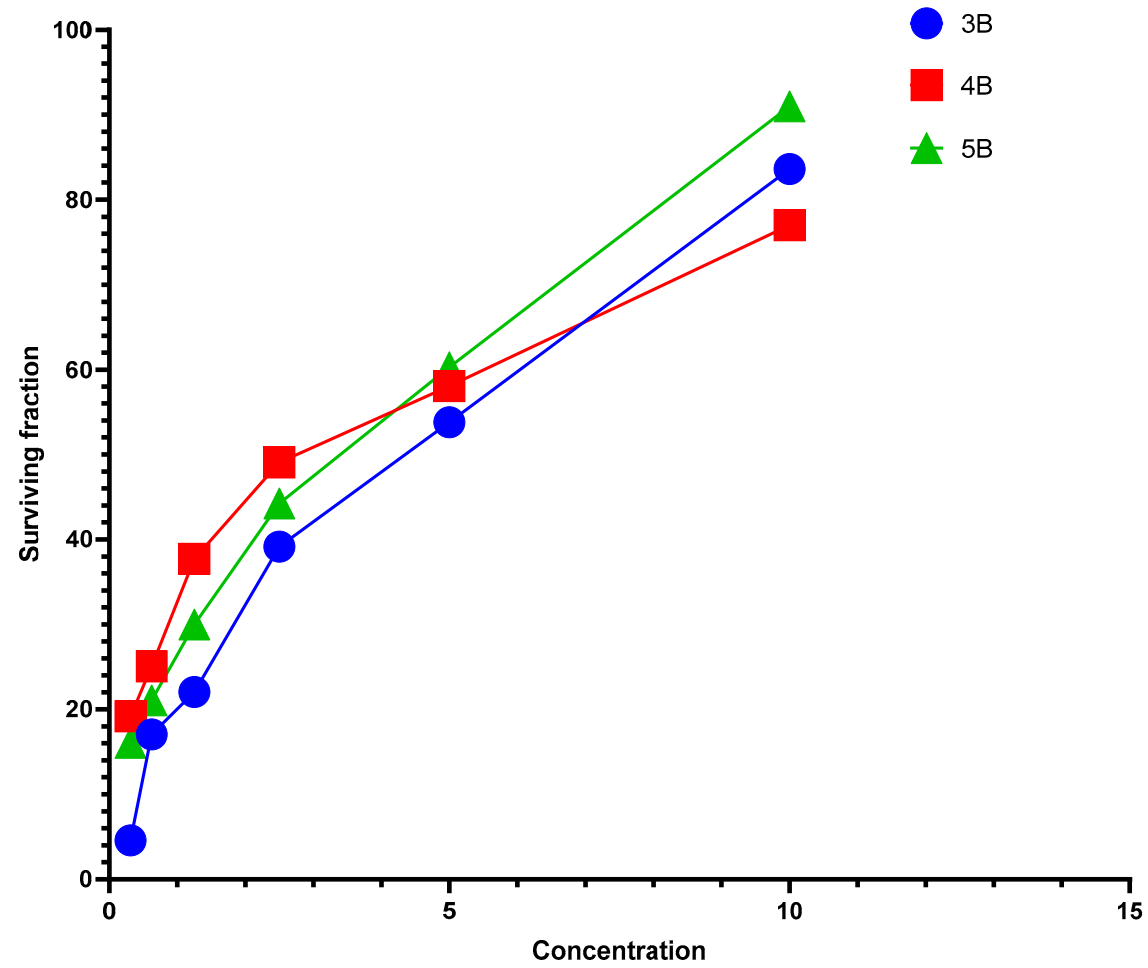

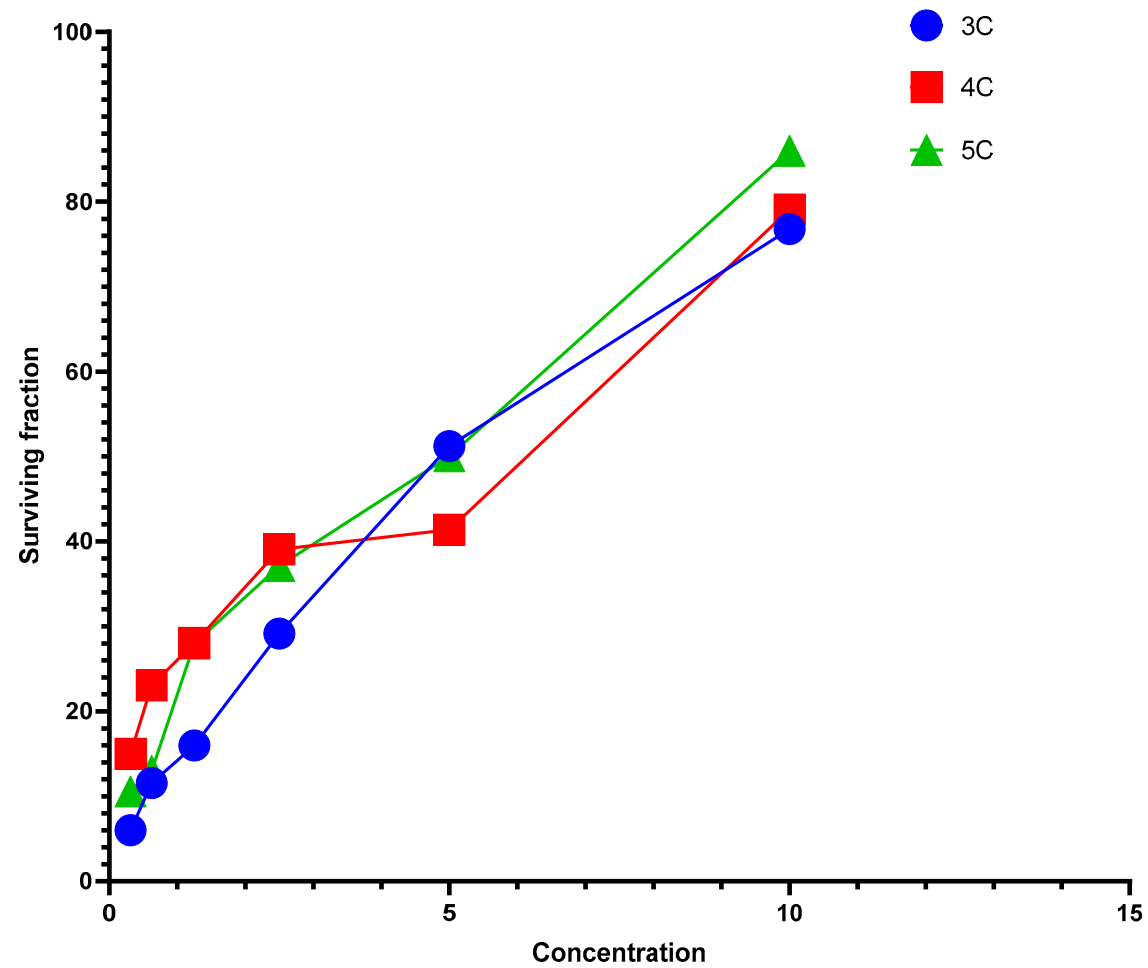

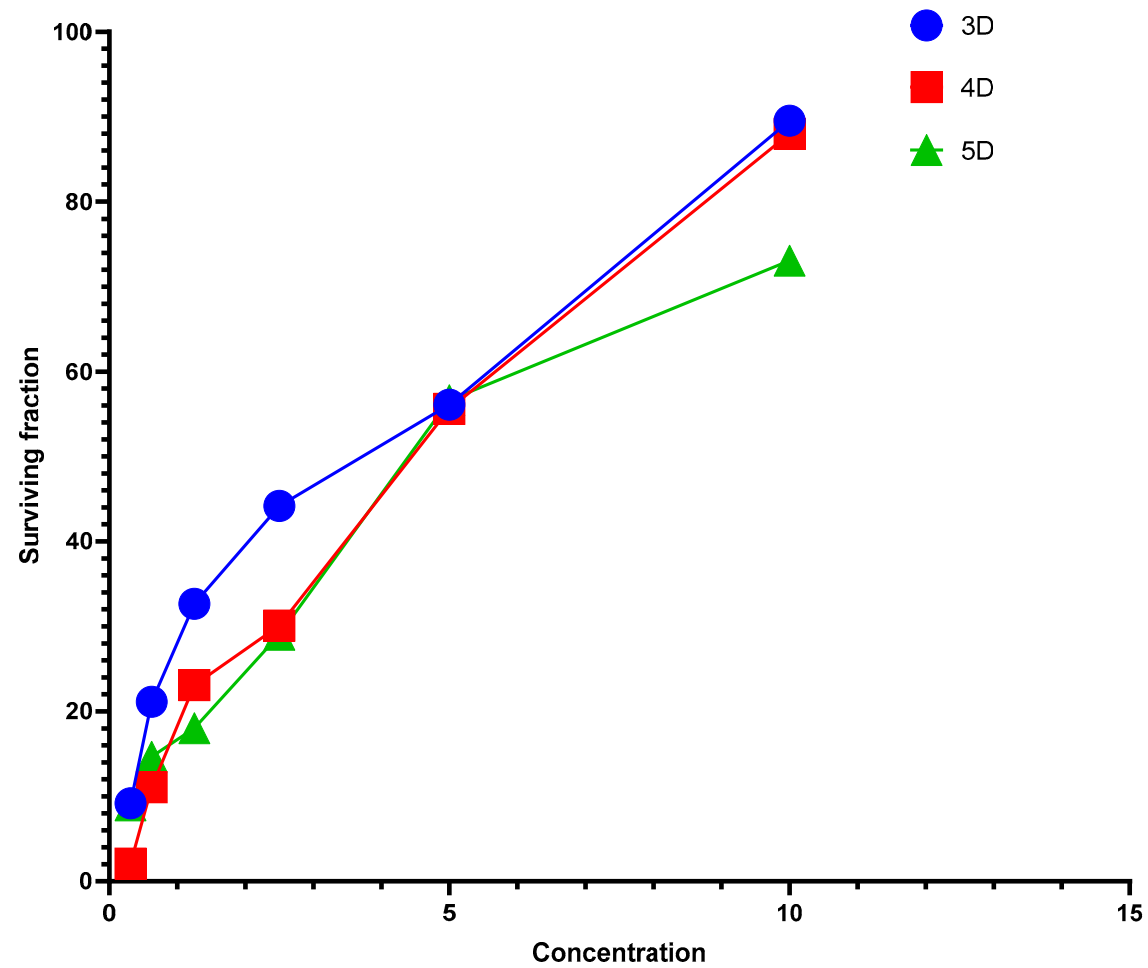

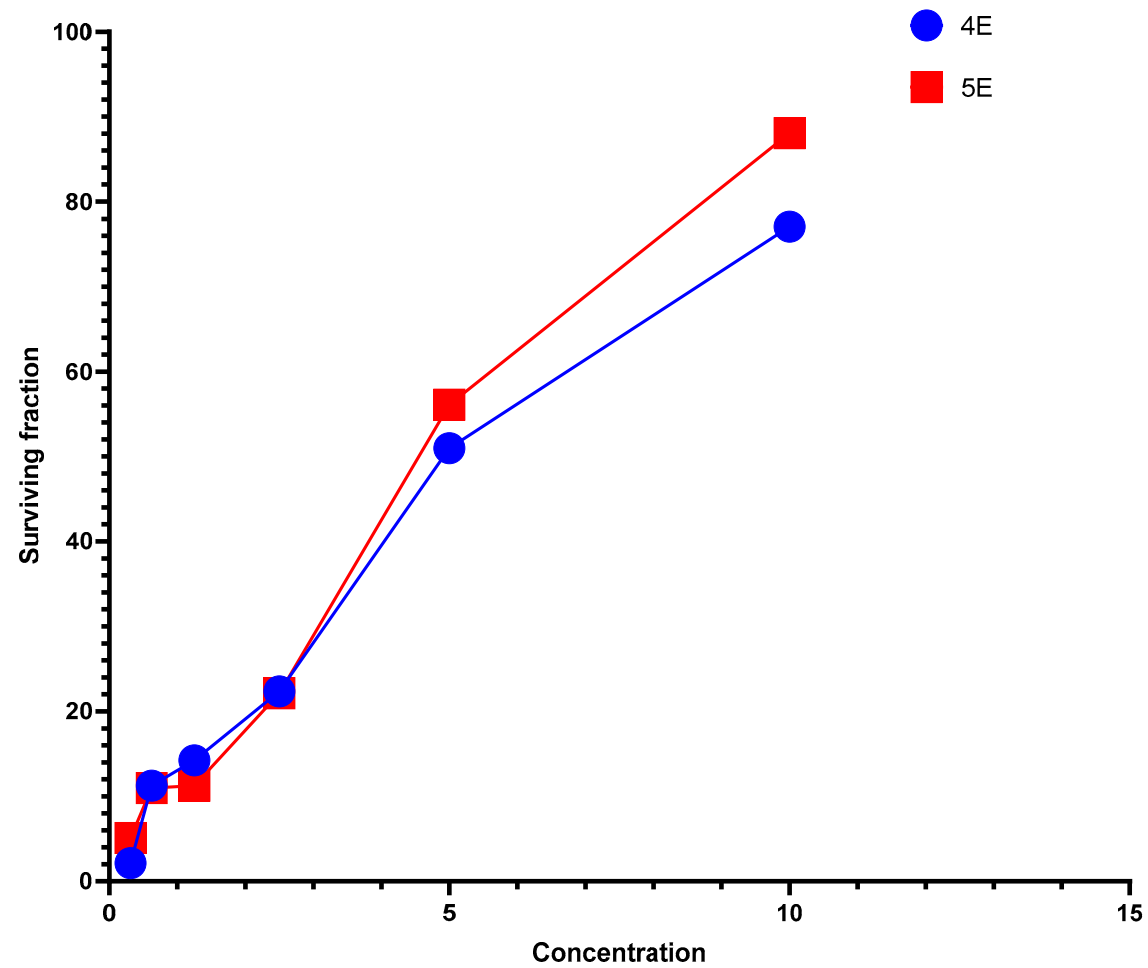

## Anti-COVID Cpd report

### Cytotoxicity assay:

| 3A | Conc (micro g/μl) | Cytotoxicity% |
|----|-------------------|---------------|
|    | 1000              | 74.9480       |
|    | 500               | 50.2564       |
|    | 250               | 28.876276     |
|    | 125               | 15.212        |
|    | 62.5              | 12.1323       |
|    | 31.2              | 5.35241       |

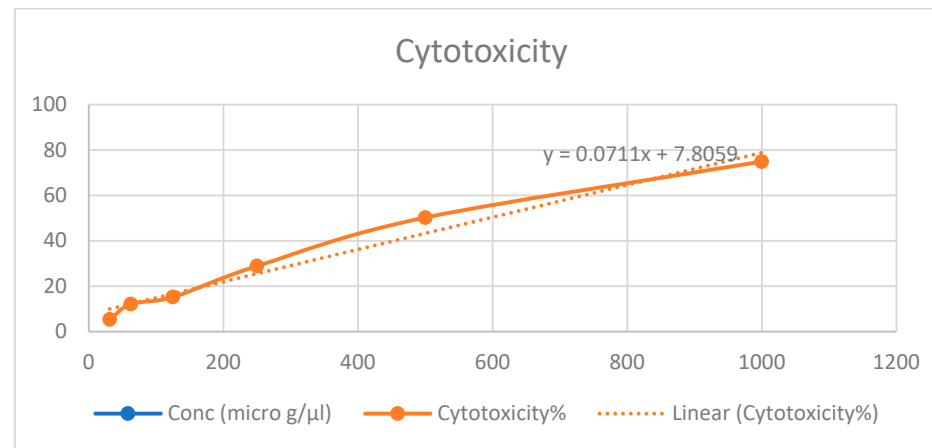

| 4A | Conc (micro g/μl) | Cytotoxicity% |
|----|-------------------|---------------|
|    | 1000              | 75.9821       |
|    | 500               | 52.8768       |
|    | 250               | 29.78287      |
|    | 125               | 14.97829      |
|    | 62.5              | 11.87209      |
|    | 31.2              | 6.16757       |

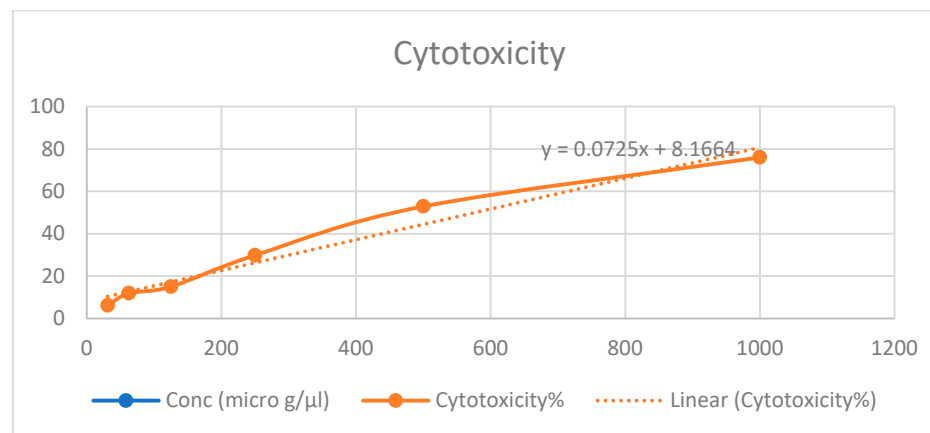



| 5A | Conc (micro g/μl) | Cytotoxicity% |
|----|-------------------|---------------|
|    | 1000              | 74.8721       |
|    | 500               | 50.13435      |
|    | 250               | 28.23546      |
|    | 125               | 16.8754       |
|    | 62.5              | 13.12375      |
|    | 31.2              | 5.83231       |

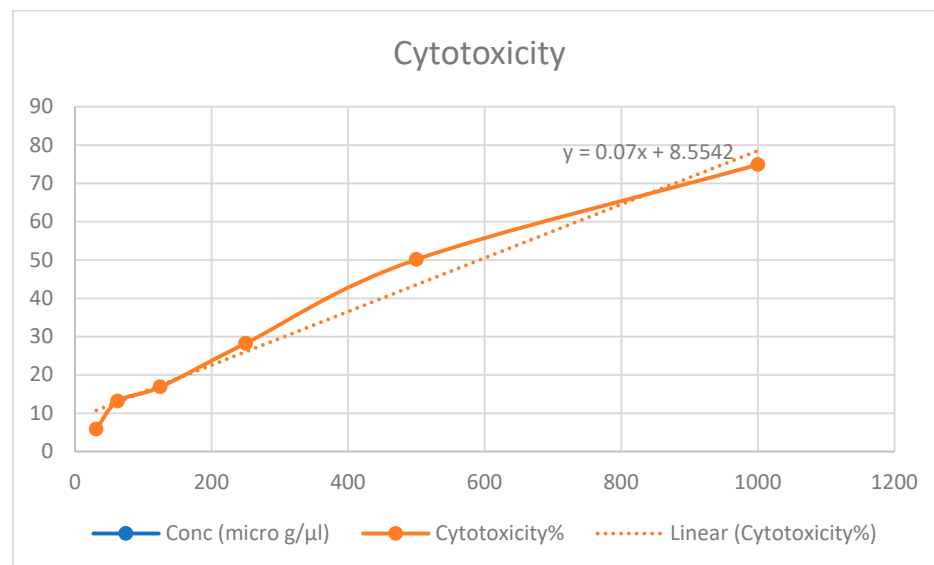

| 3C | Conc (micro g/μl) | Cytotoxicity% |
|----|-------------------|---------------|
|    | 1000              | 76.7863       |
|    | 500               | 51.2423       |
|    | 250               | 29.2411       |
|    | 125               | 15.95432      |
|    | 62.5              | 11.6224       |
|    | 31.2              | 6.02111       |

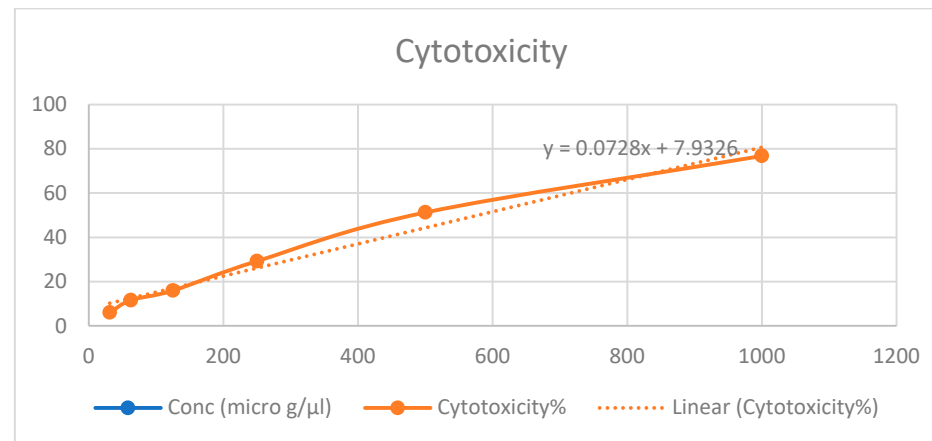

| 4C | Conc (micro g/μl) | Cytotoxicity% |
|----|-------------------|---------------|
|    | 1000              | 79.12321      |
|    | 500               | 41.45364      |
|    | 250               | 39.12891      |
|    | 125               | 28.11989      |
|    | 62.5              | 23.12398      |
|    | 31.2              | 15.02359      |

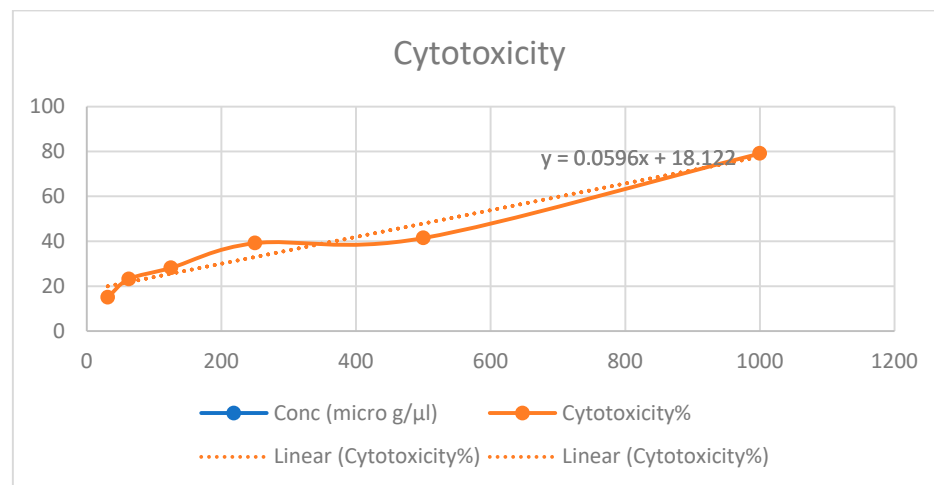

| 5C | Conc (micro g/μl) | Cytotoxicity% |
|----|-------------------|---------------|
|    | 1000              | 85.9899       |
|    | 500               | 50.11032      |
|    | 250               | 37.12091      |
|    | 125               | 28.00918      |
|    | 62.5              | 12.97801      |
|    | 31.2              | 10.65442      |

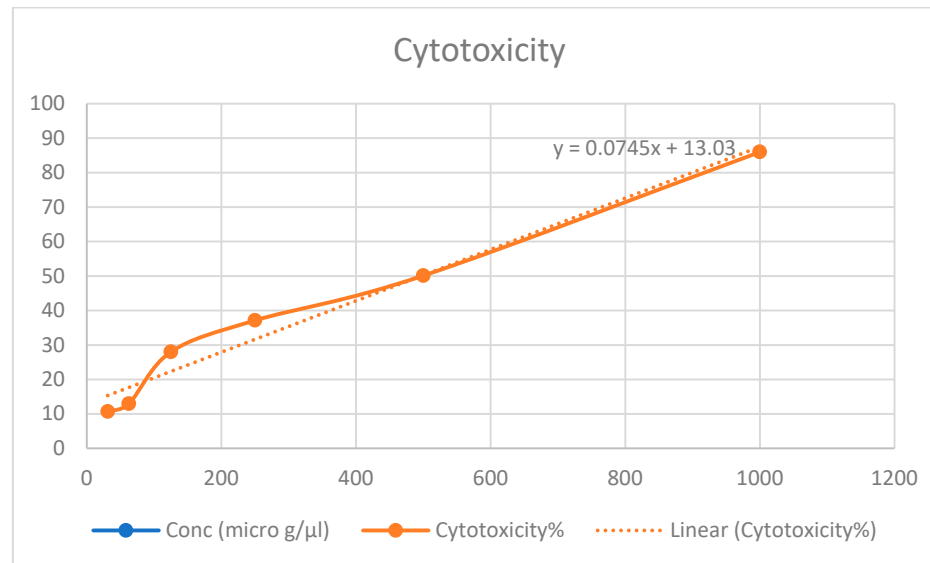

| 3B | Conc (micro g/μl) | Cytotoxicity% |
|----|-------------------|---------------|
|    | 1000              | 83.6251       |
|    | 500               | 53.8761       |
|    | 250               | 39.1991       |
|    | 125               | 22.0918       |
|    | 62.5              | 17.1098       |
|    | 31.2              | 4.65510       |

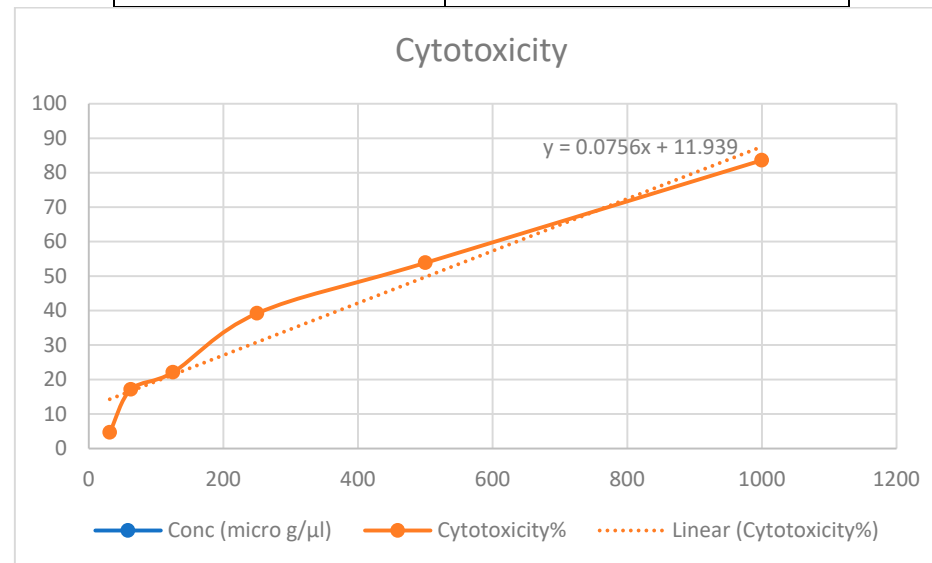

| 4B | Conc (micro g/μl) | Cytotoxicity% |
|----|-------------------|---------------|
|    | 1000              | 77.0009       |
|    | 500               | 58.0981       |
|    | 250               | 49.1205       |
|    | 125               | 37.76181      |
|    | 62.5              | 25.1651       |
|    | 31.2              | 19.18054      |

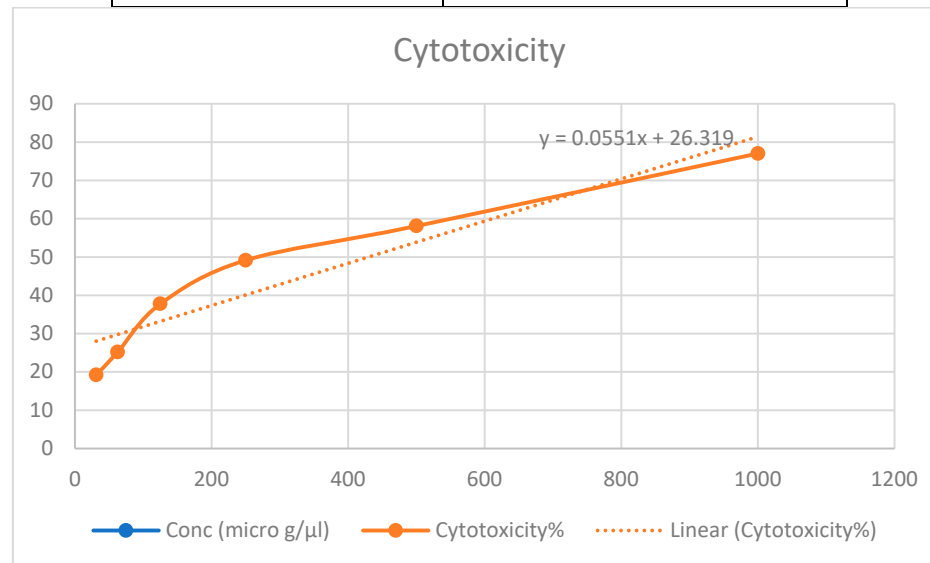

| 5B | Conc (micro g/μl) | Cytotoxicity% |
|----|-------------------|---------------|
|    | 1000              | 90.9826       |
|    | 500               | 60.2976       |
|    | 250               | 44.2976       |
|    | 125               | 30.0092       |
|    | 62.5              | 21.14378      |
|    | 31.2              | 16.1887       |

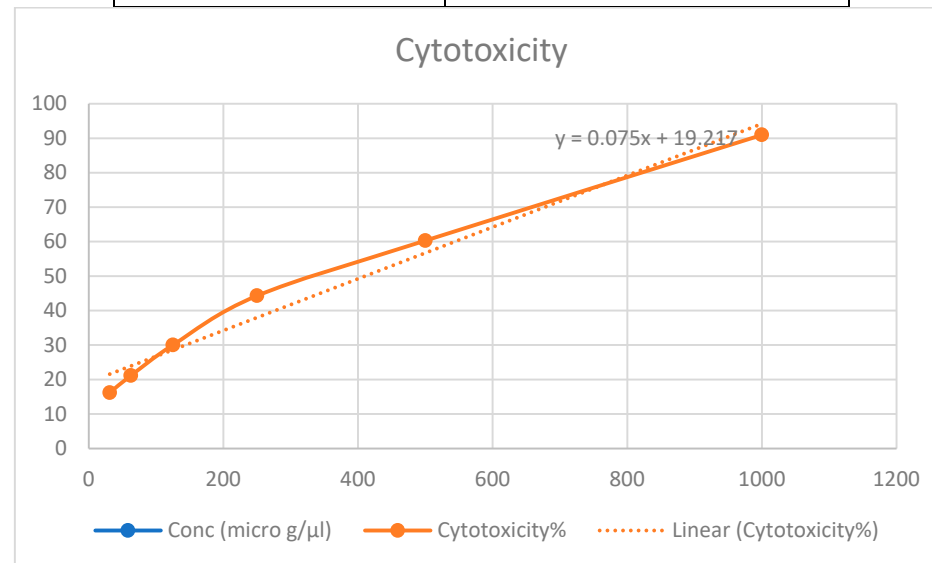

| 3D | Conc (micro g/μl) | Cytotoxicity% |
|----|-------------------|---------------|
|    | 1000              | 89.5618       |
|    | 500               | 56.1097       |
|    | 250               | 44.2652       |
|    | 125               | 32.7651       |
|    | 62.5              | 21.1987       |
|    | 31.2              | 9.19871       |

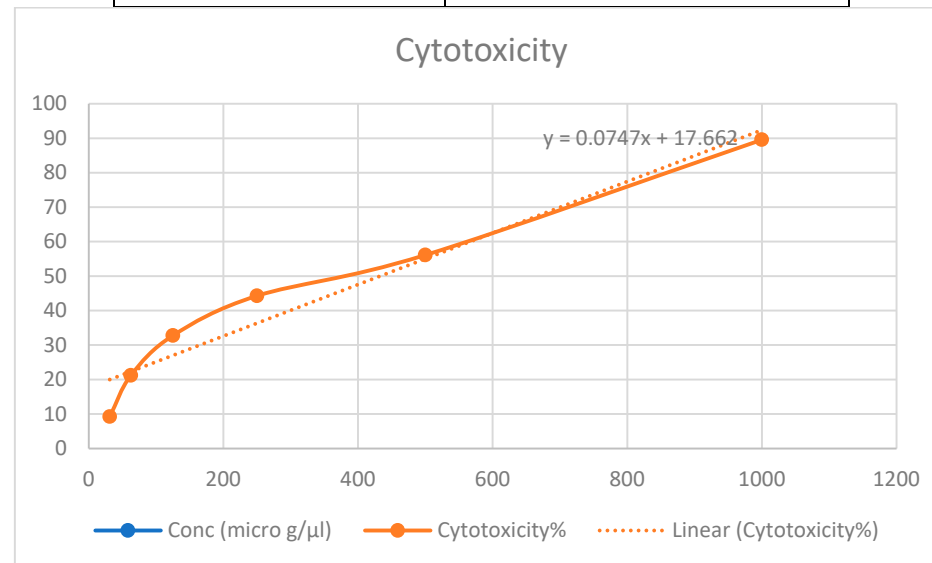



| 4D | Conc (micro<br>g/ $\mu$ l) | Cytotoxicity% |
|----|----------------------------|---------------|
|    | 1000                       | 88.01981      |
|    | 500                        | 55.66551      |
|    | 250                        | 30.19711      |
|    | 125                        | 23.19871      |
|    | 62.5                       | 11.18711      |
|    | 31.2                       | 2.187511      |

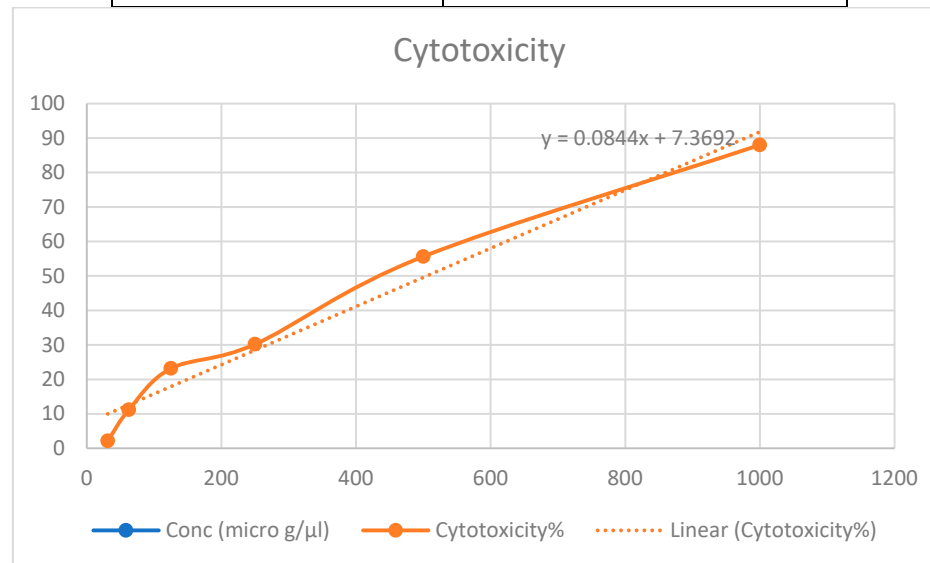

| 5D | Conc (micro g/μl) | Cytotoxicity% |
|----|-------------------|---------------|
|    | 1000              | 73.14226      |
|    | 500               | 56.7811       |
|    | 250               | 29.0912       |
|    | 125               | 18.07912      |
|    | 62.5              | 14.7896       |
|    | 31.2              | 8.90569       |

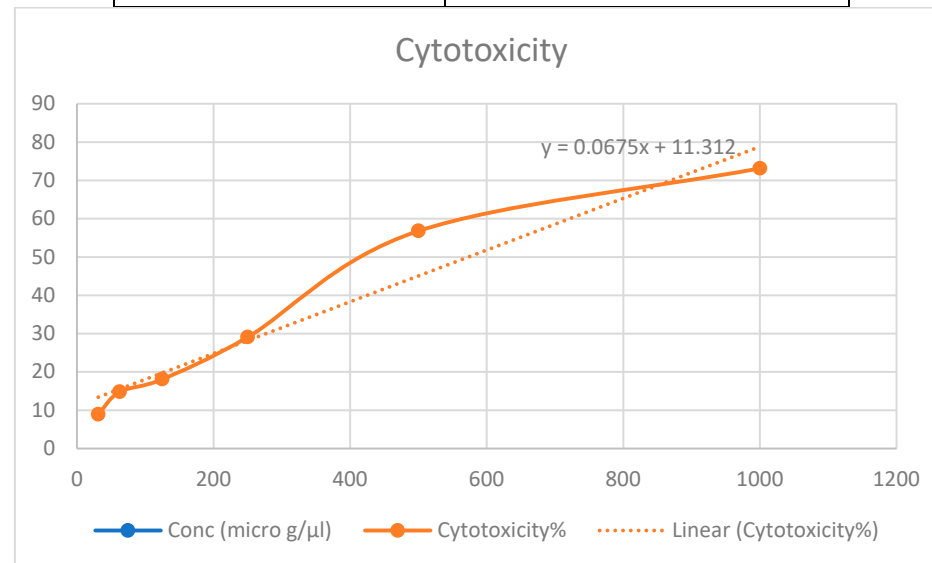

| 4E | Conc (micro g/μl) | Cytotoxicity% |
|----|-------------------|---------------|
|    | 1000              | 77.09444      |
|    | 500               | 50.9866       |
|    | 250               | 22.45123      |
|    | 125               | 14.3221       |
|    | 62.5              | 11.3308       |
|    | 31.2              | 2.30256       |

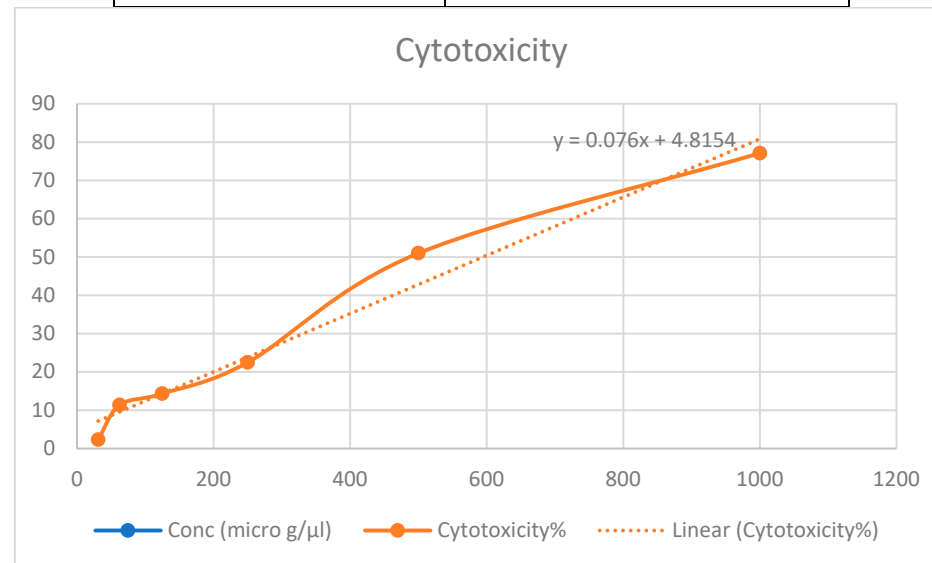

| 5E | Conc (micro g/μl) | Cytotoxicity% |
|----|-------------------|---------------|
|    | 1000              | 88.1425       |
|    | 500               | 56.2314       |
|    | 250               | 22.2232       |
|    | 125               | 11.33456      |
|    | 62.5              | 10.98061      |
|    | 31.2              | 5.18705       |

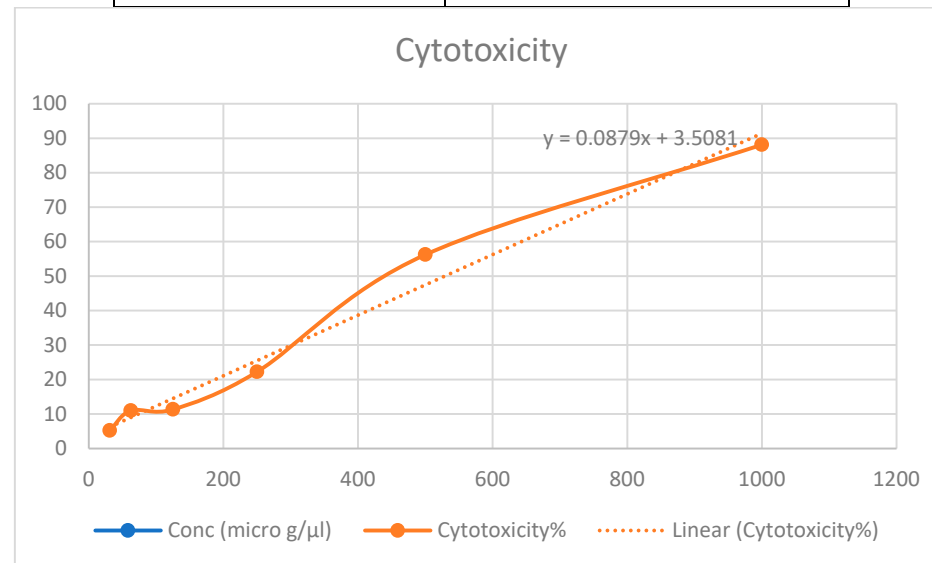

# Docking study figures

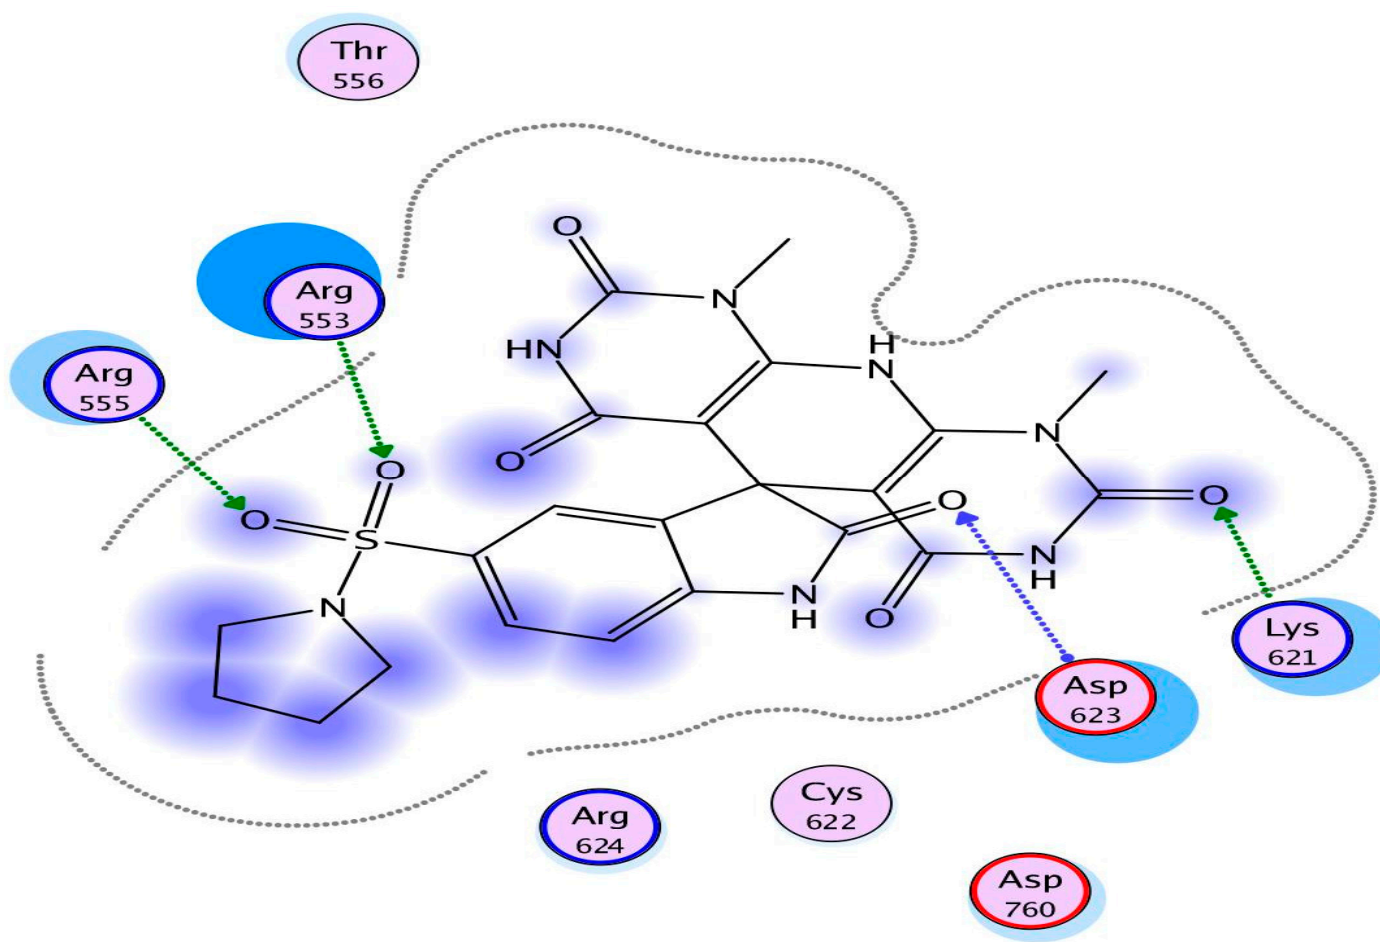

2D structure of compound **3a** inside the active site of RNA polymerase (RdRp) (PDB: 6m71)

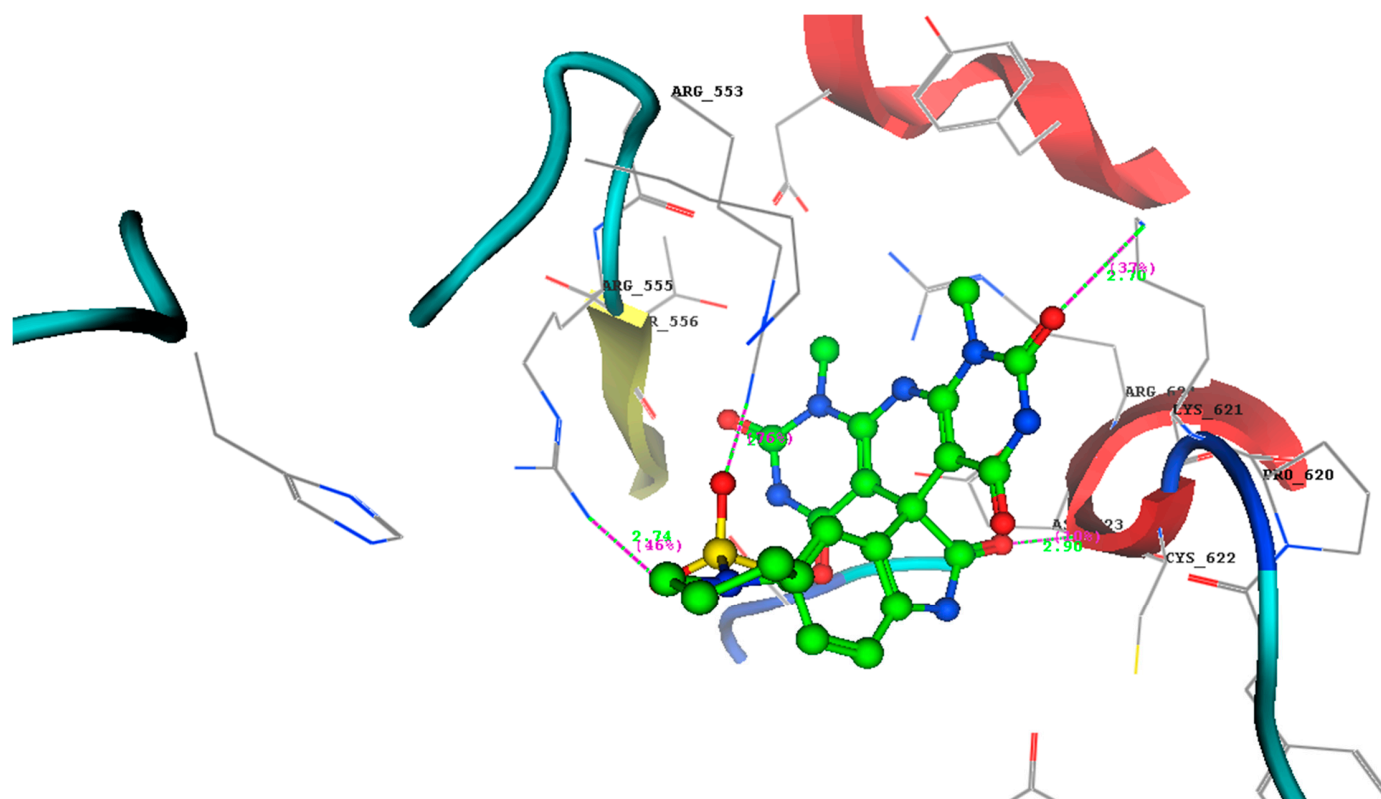

3D structure of compound **3a** inside the active site of RNA polymerase (RdRp) (PDB: 6m71)

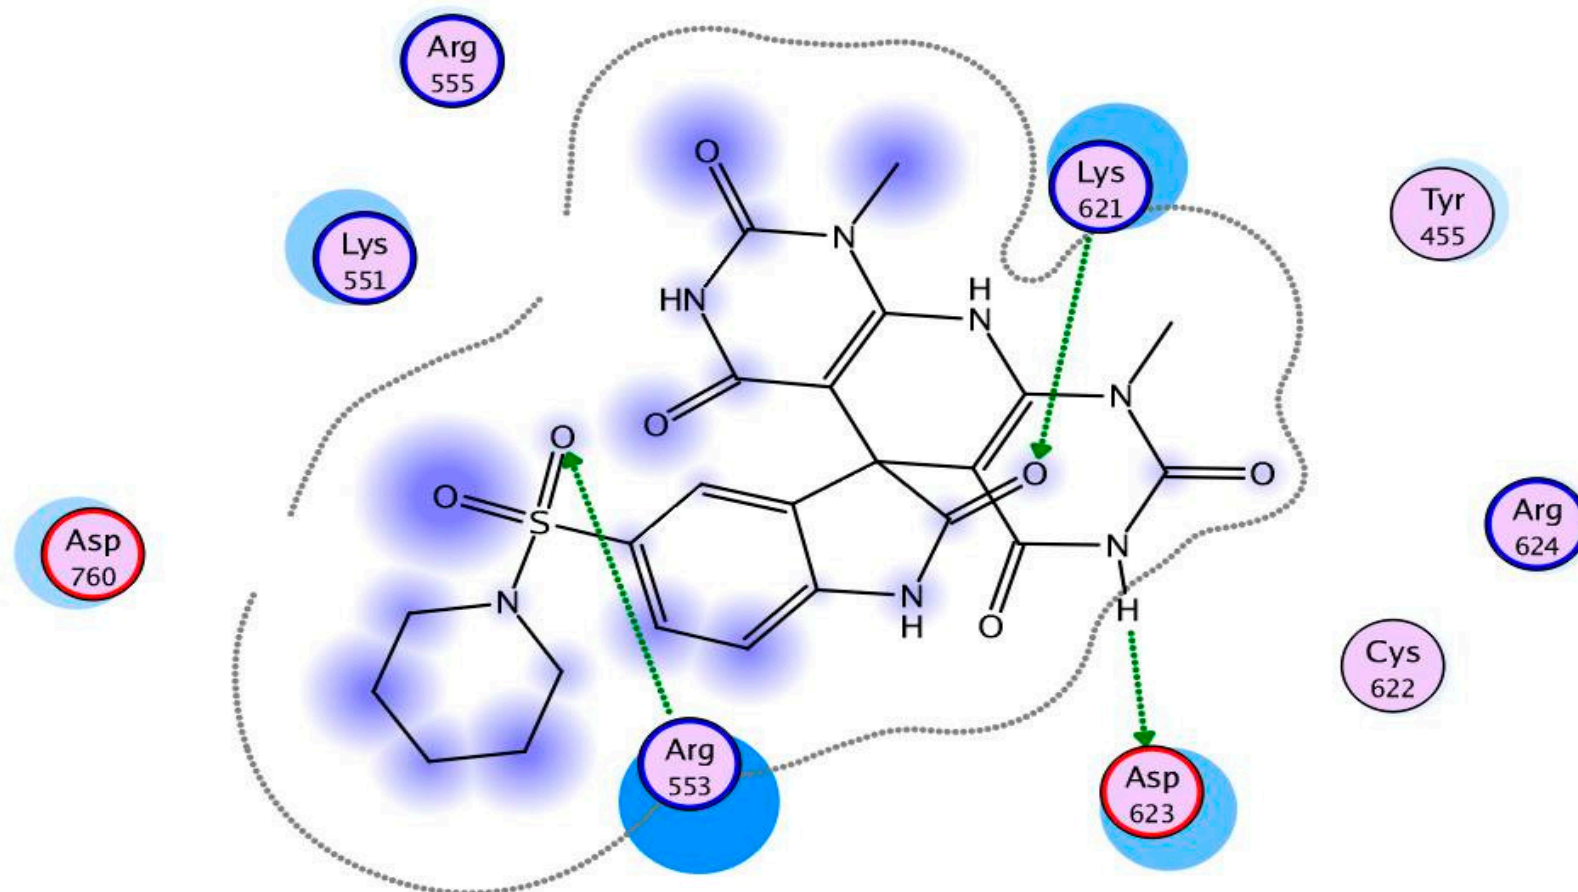

2D structure of compound **4b** inside the active site of RNA polymerase (RdRp) (PDB: 6m71)



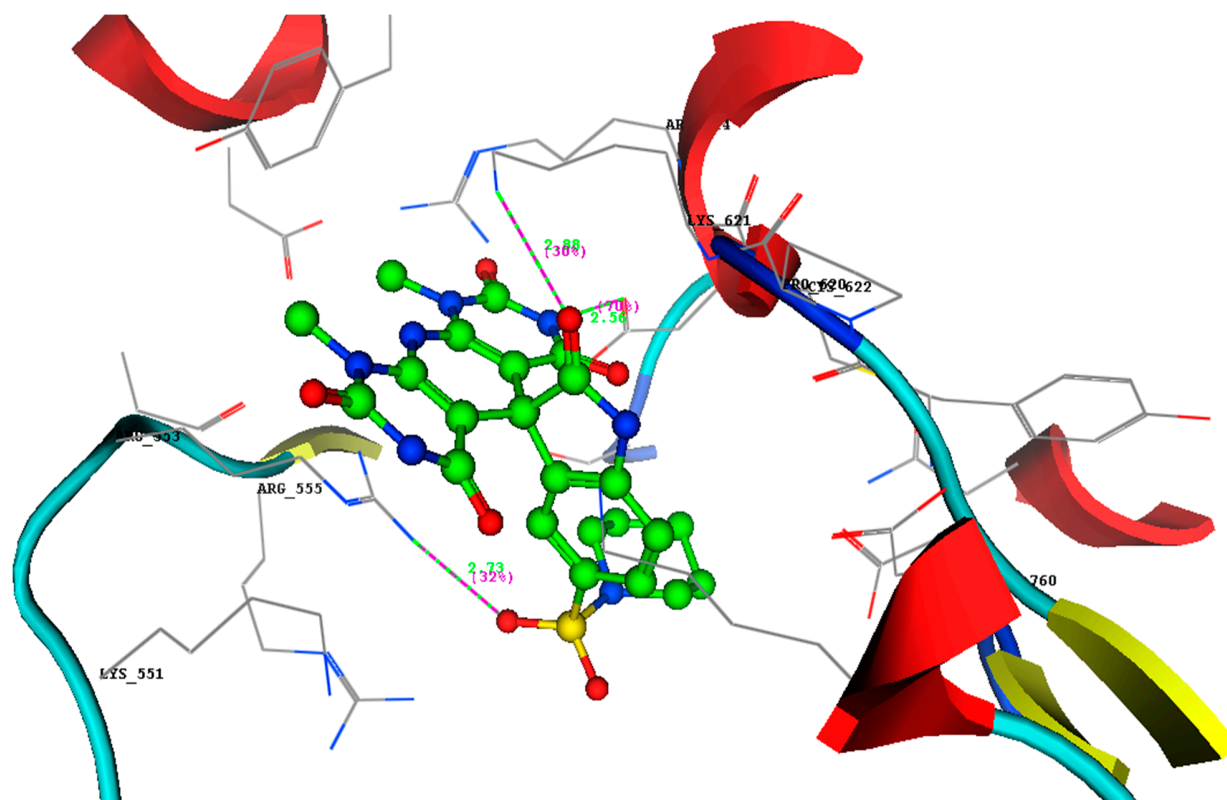

3D structure of compound **4b** inside the active site of RNA polymerase (RdRp) (PDB: 6m71)

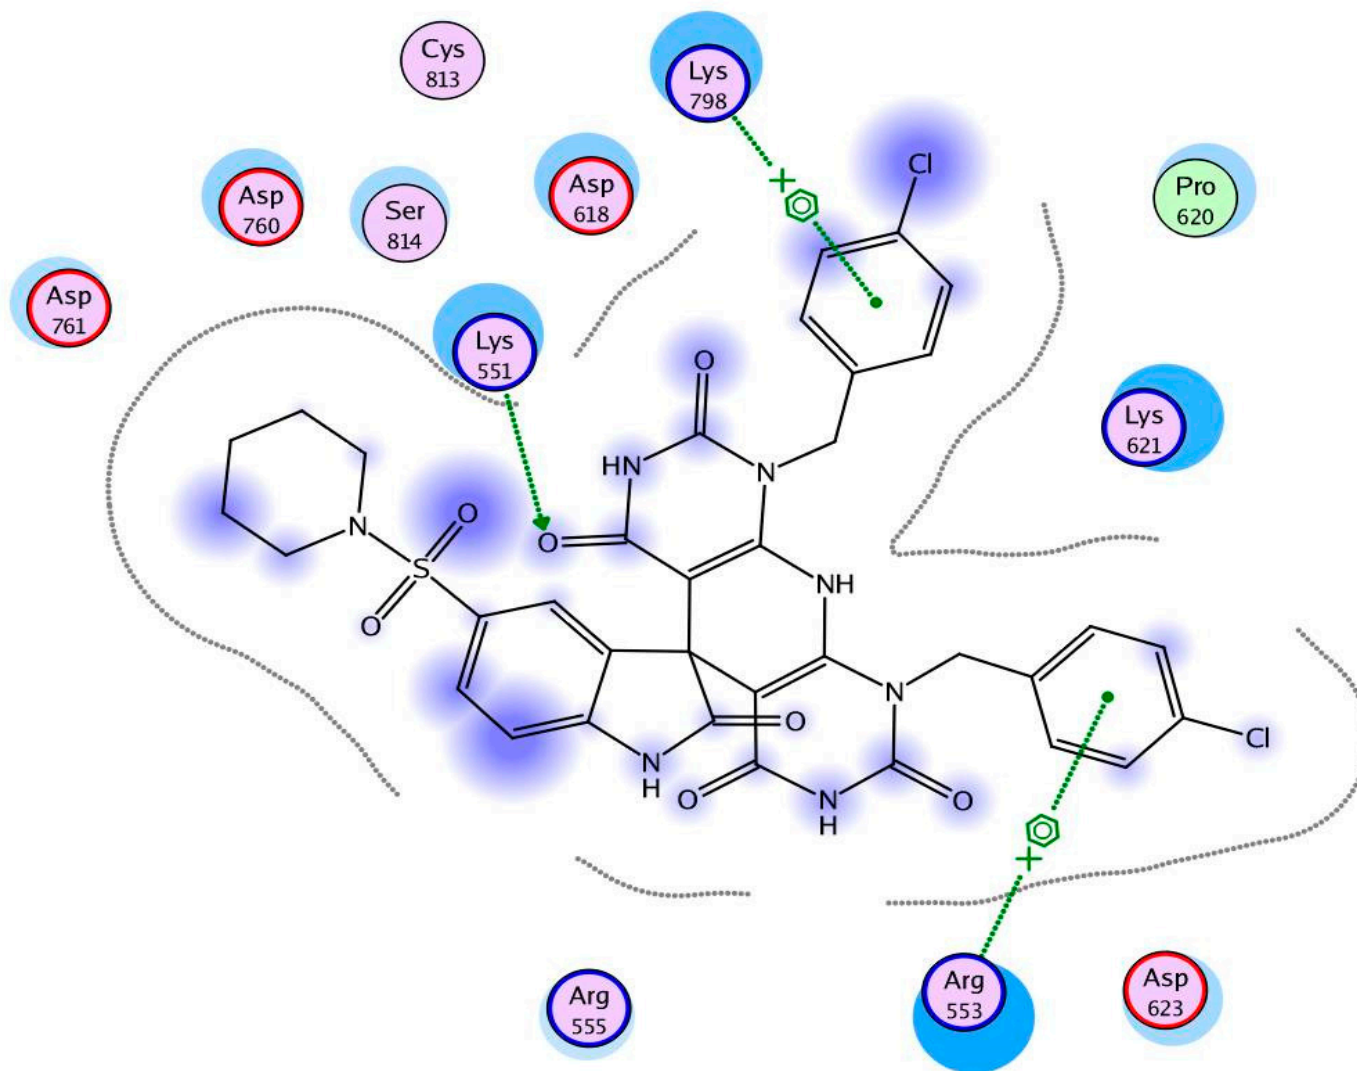

2D structure of compound **4d** inside the active site of RNA polymerase (RdRp) (PDB: 6m71)

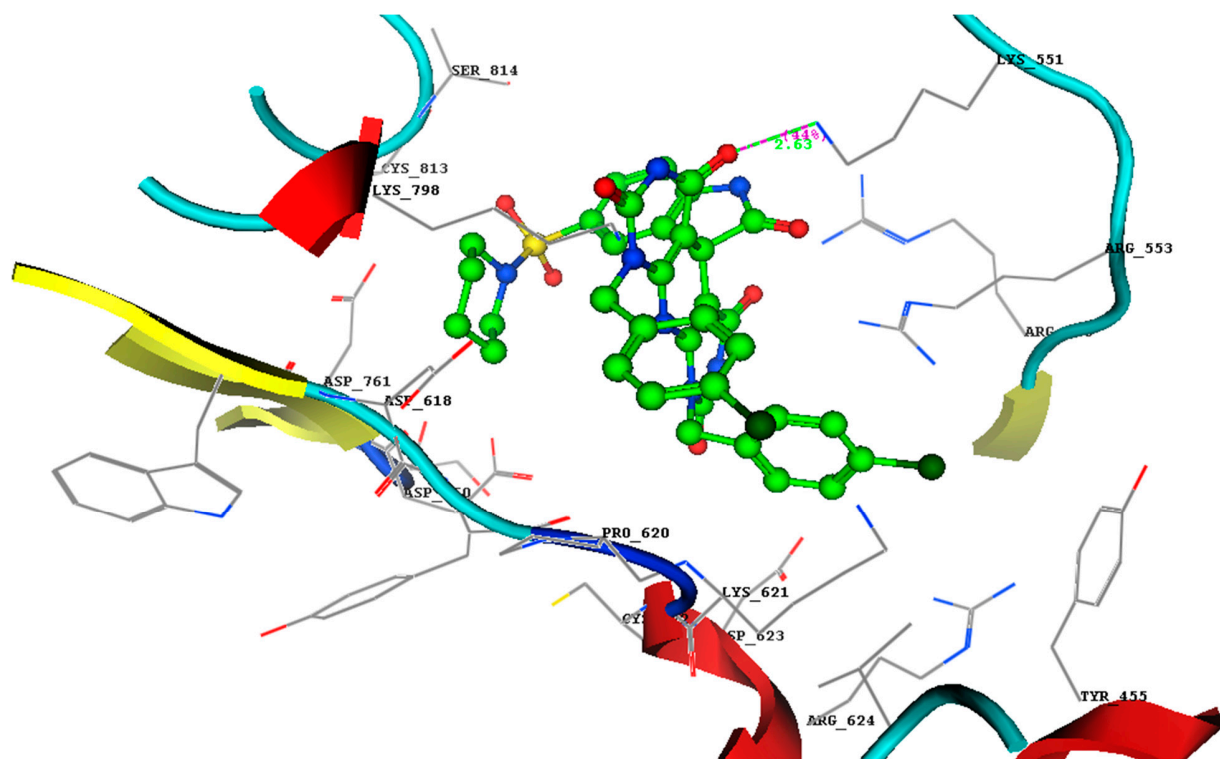

3D structure of compound **4d** inside the active site of RNA polymerase (RdRp) (PDB: 6m71)

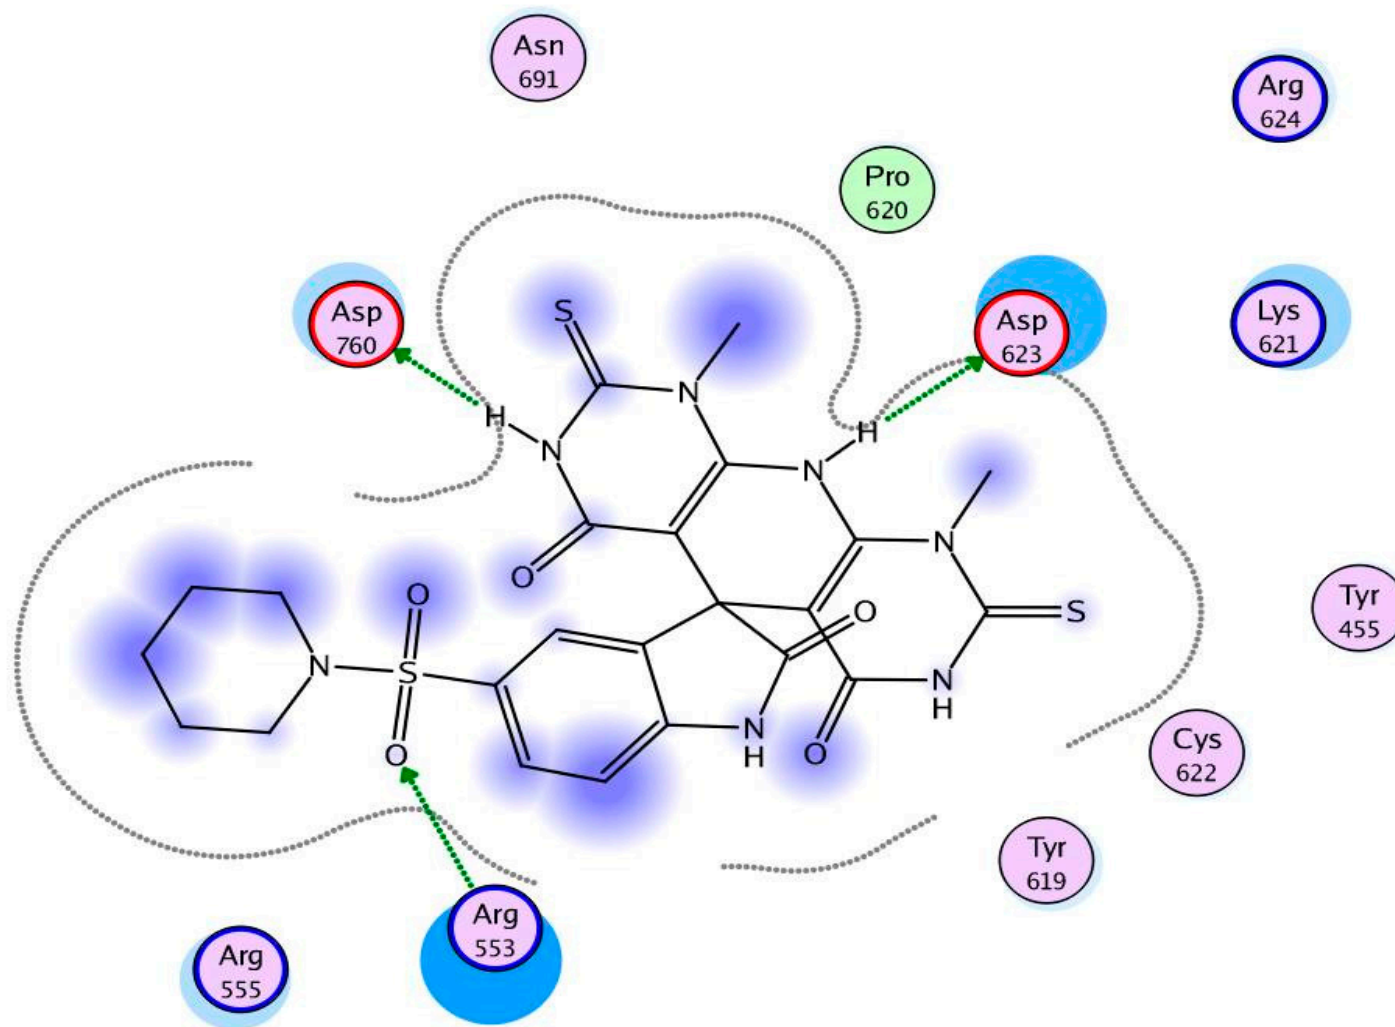

2D structure of compound **4e** inside the active site of RNA polymerase (RdRp) (PDB: 6m71)

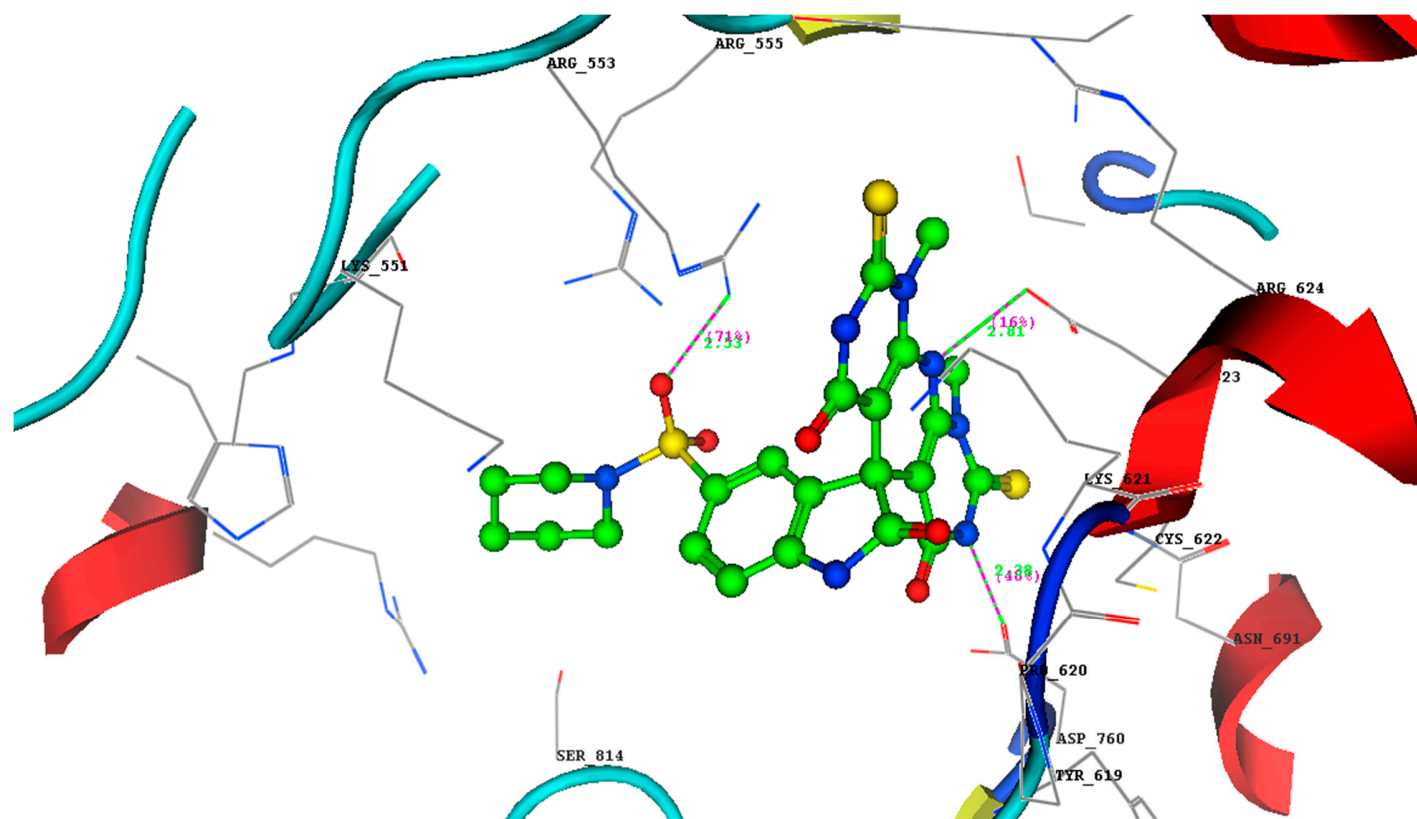

3D structure of compound **4e** inside the active site of RNA polymerase (RdRp) (PDB: 6m71)

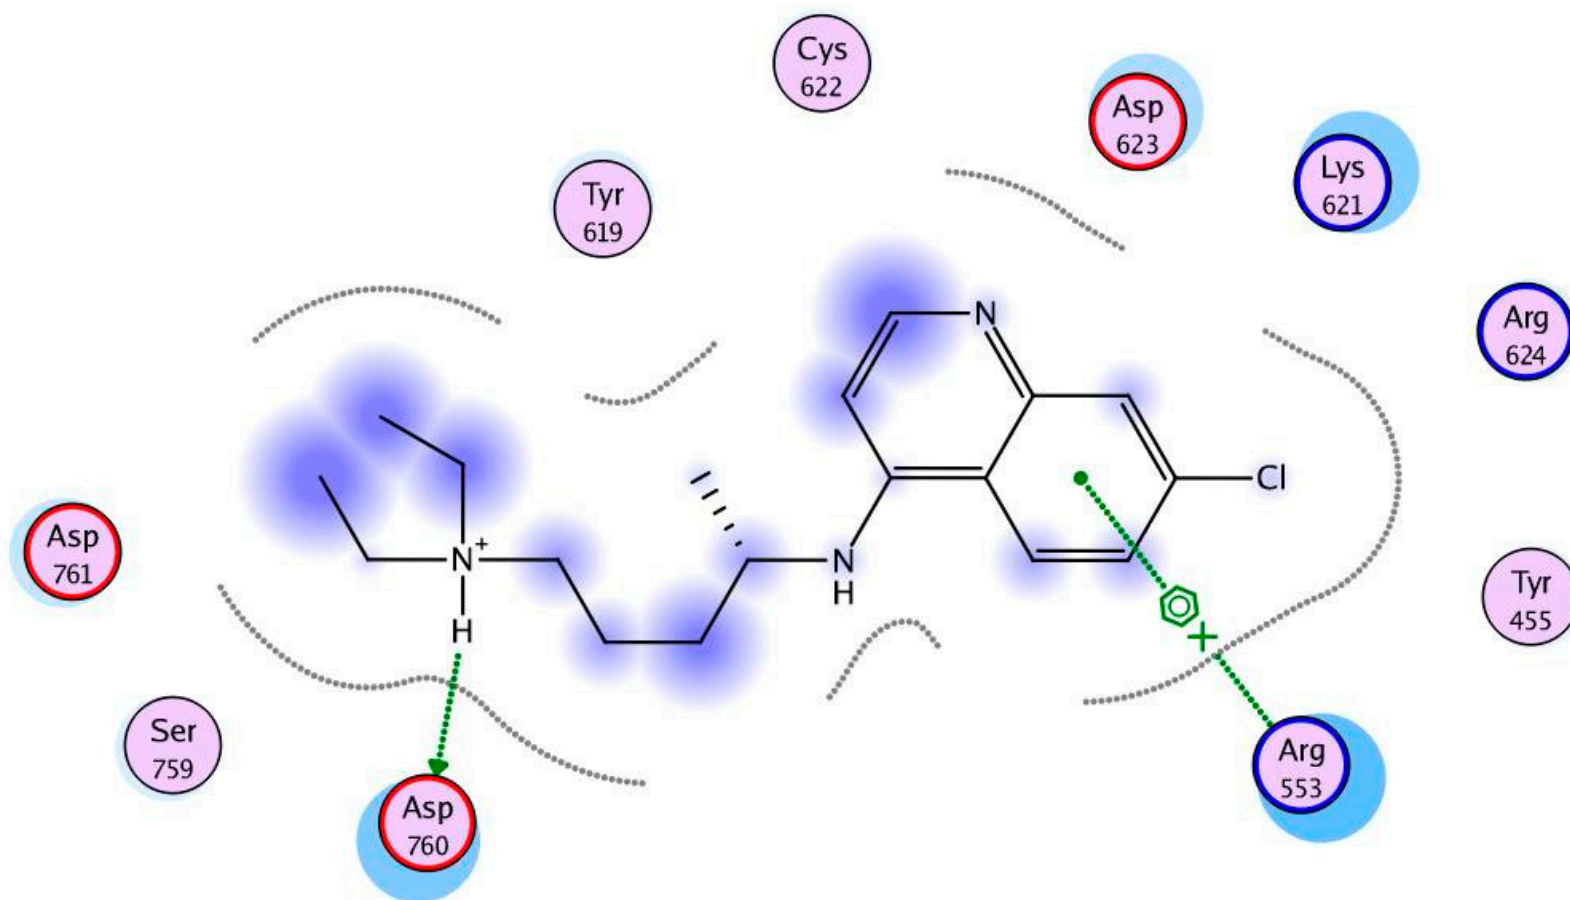

2D structure of **Chloroquine** inside the active site of RNA polymerase (RdRp) (PDB: 6m71)

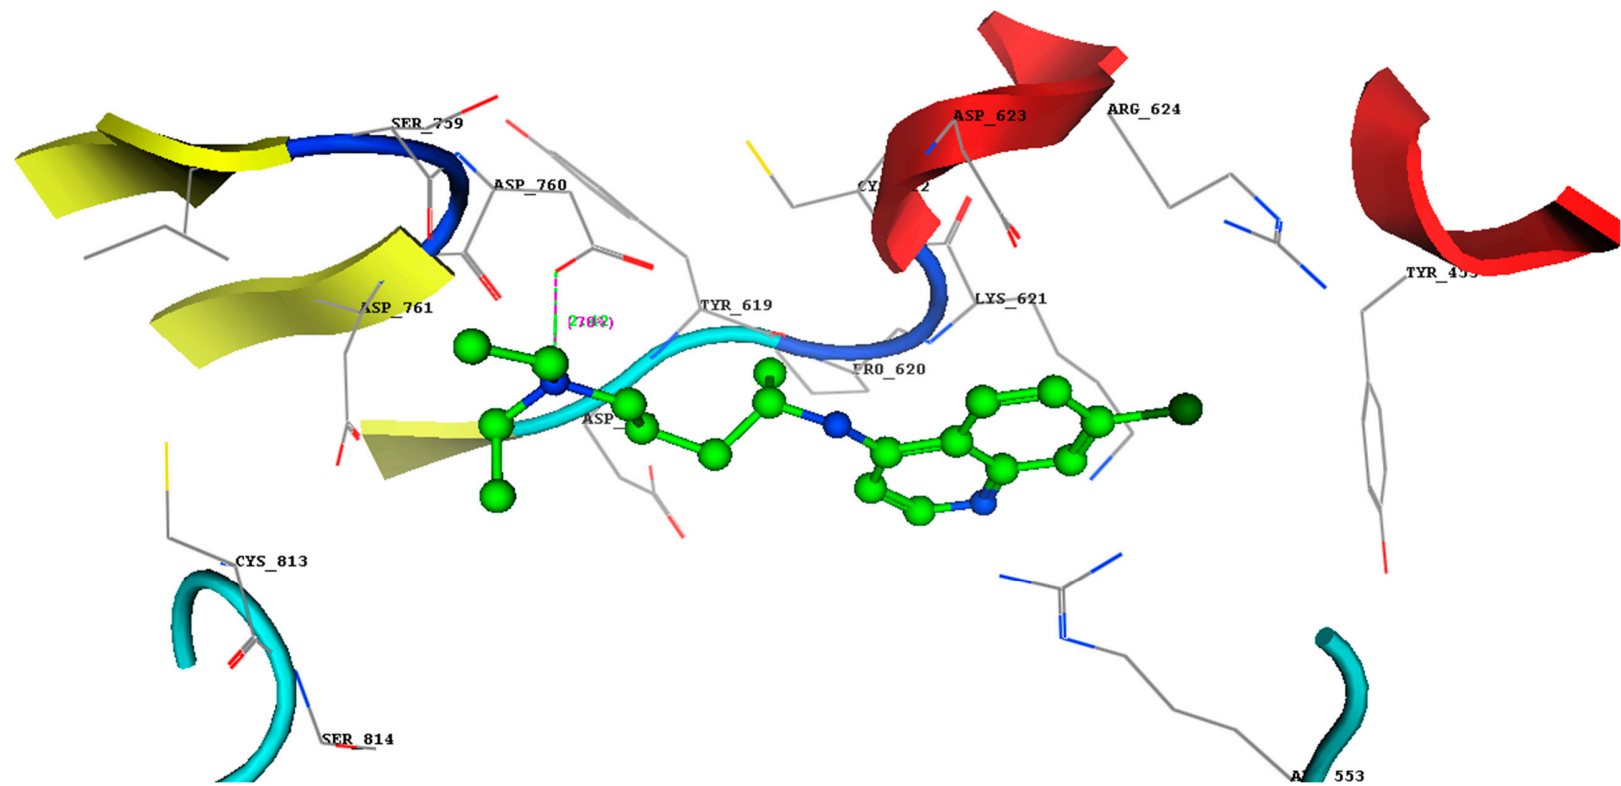

3D structure of **Chloroquine** inside the active site of RNA polymerase (RdRp) (PDB: 6m71)



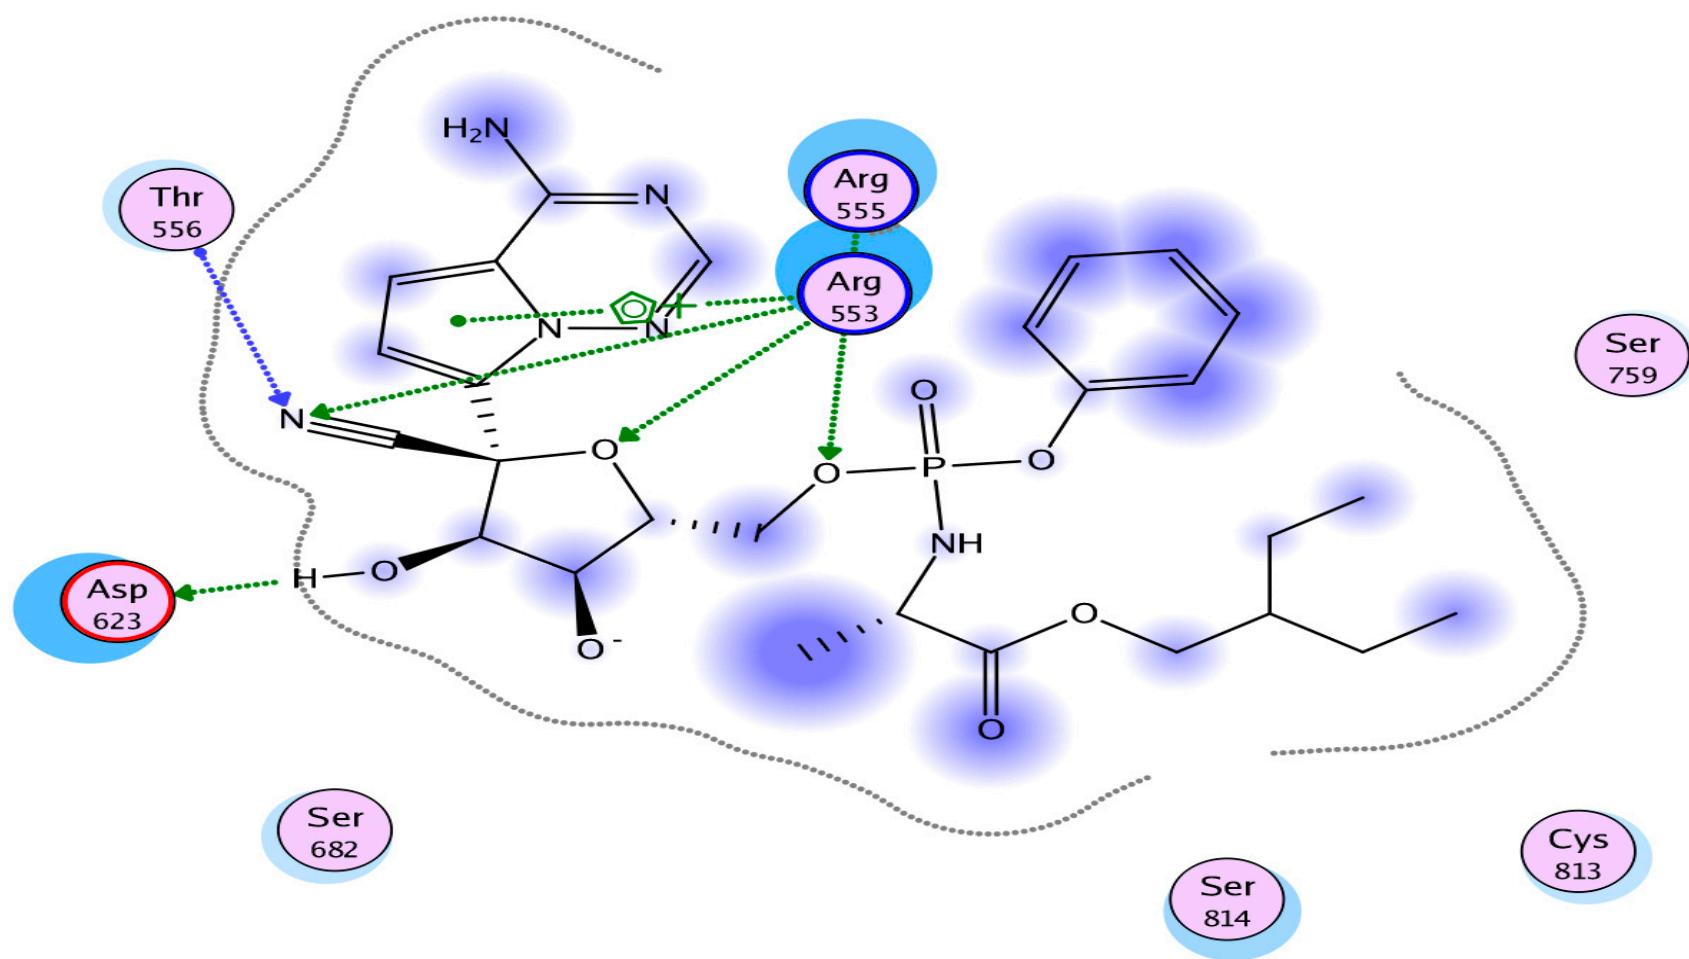

2D structure of **Remdesivir** inside the active site of RNA polymerase (RdRp) (PDB: 6m71)



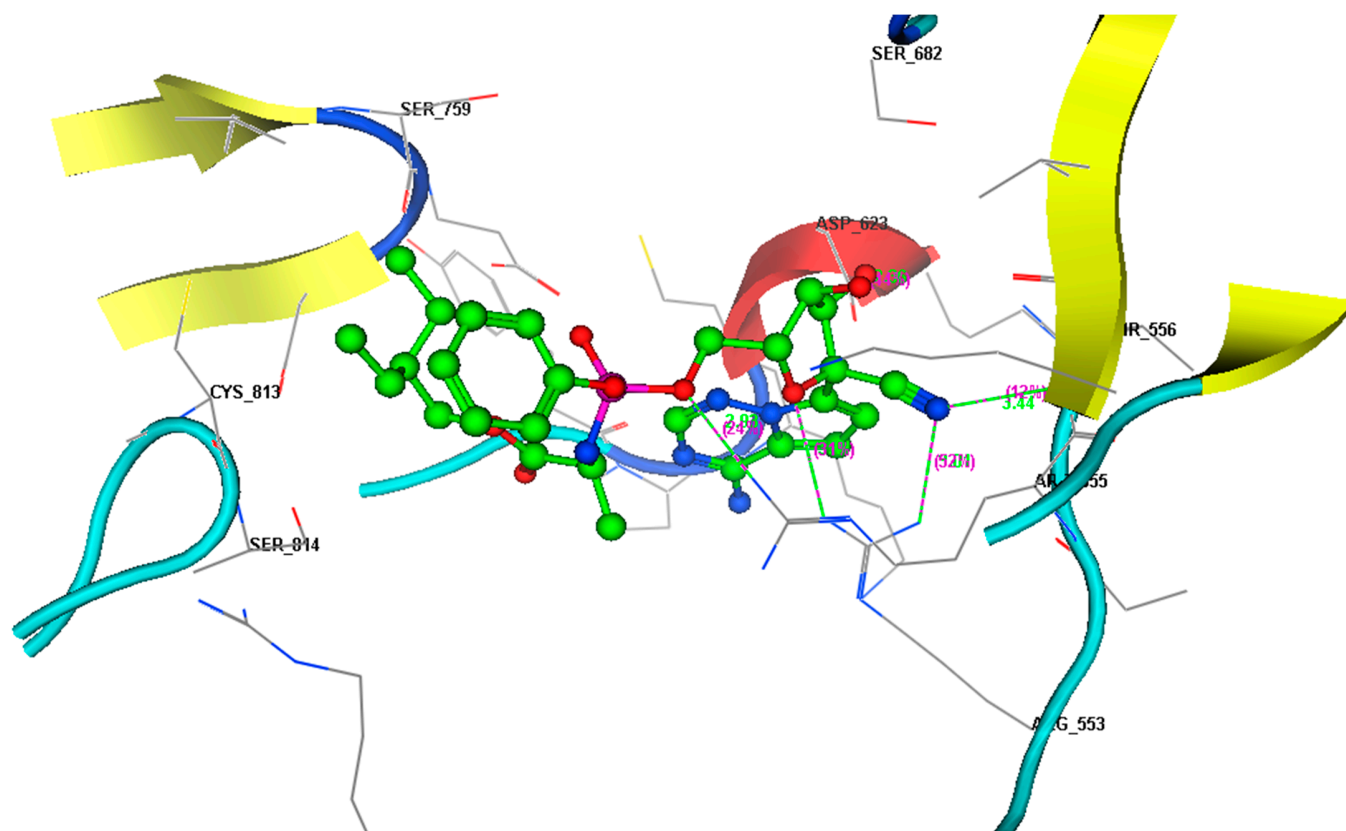

3D structure of **Remdesivir** inside the active site of RNA polymerase (RdRp) (PDB: 6m71)

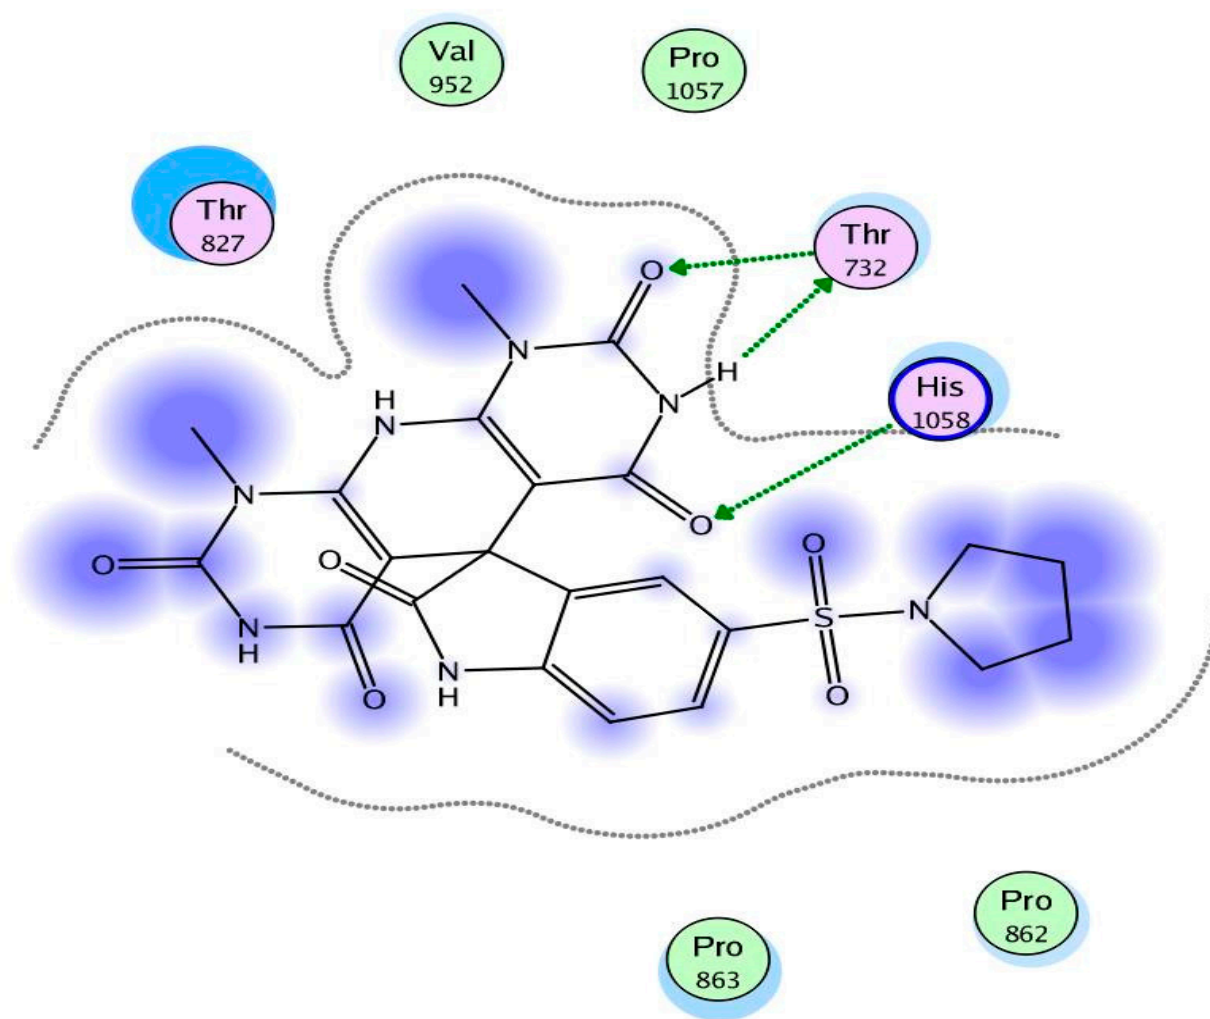

2D structure of compound **3a** inside the active site of spike glycoprotein (SGp) (PDB: 6VXX)

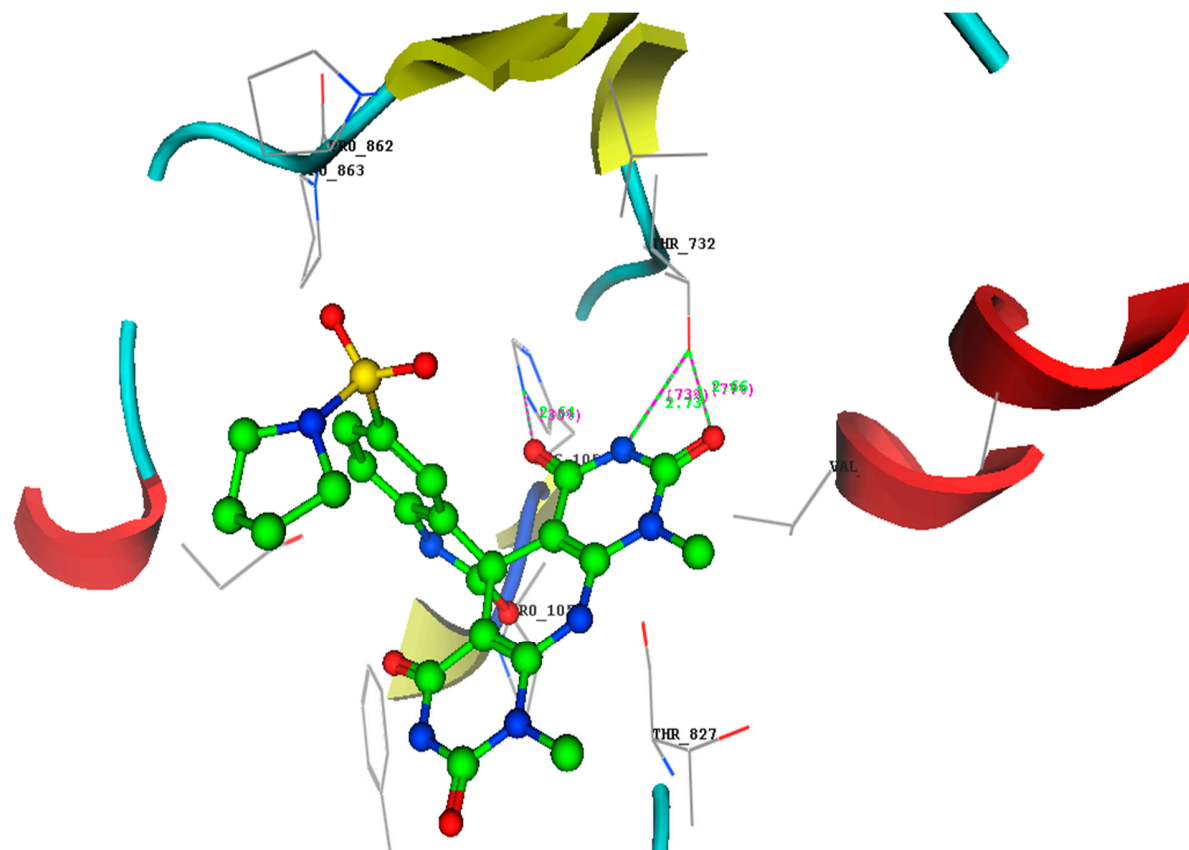

3D structure of compound **3a** inside the active site of spike glycoprotein (SGp) (PDB: 6VXX)

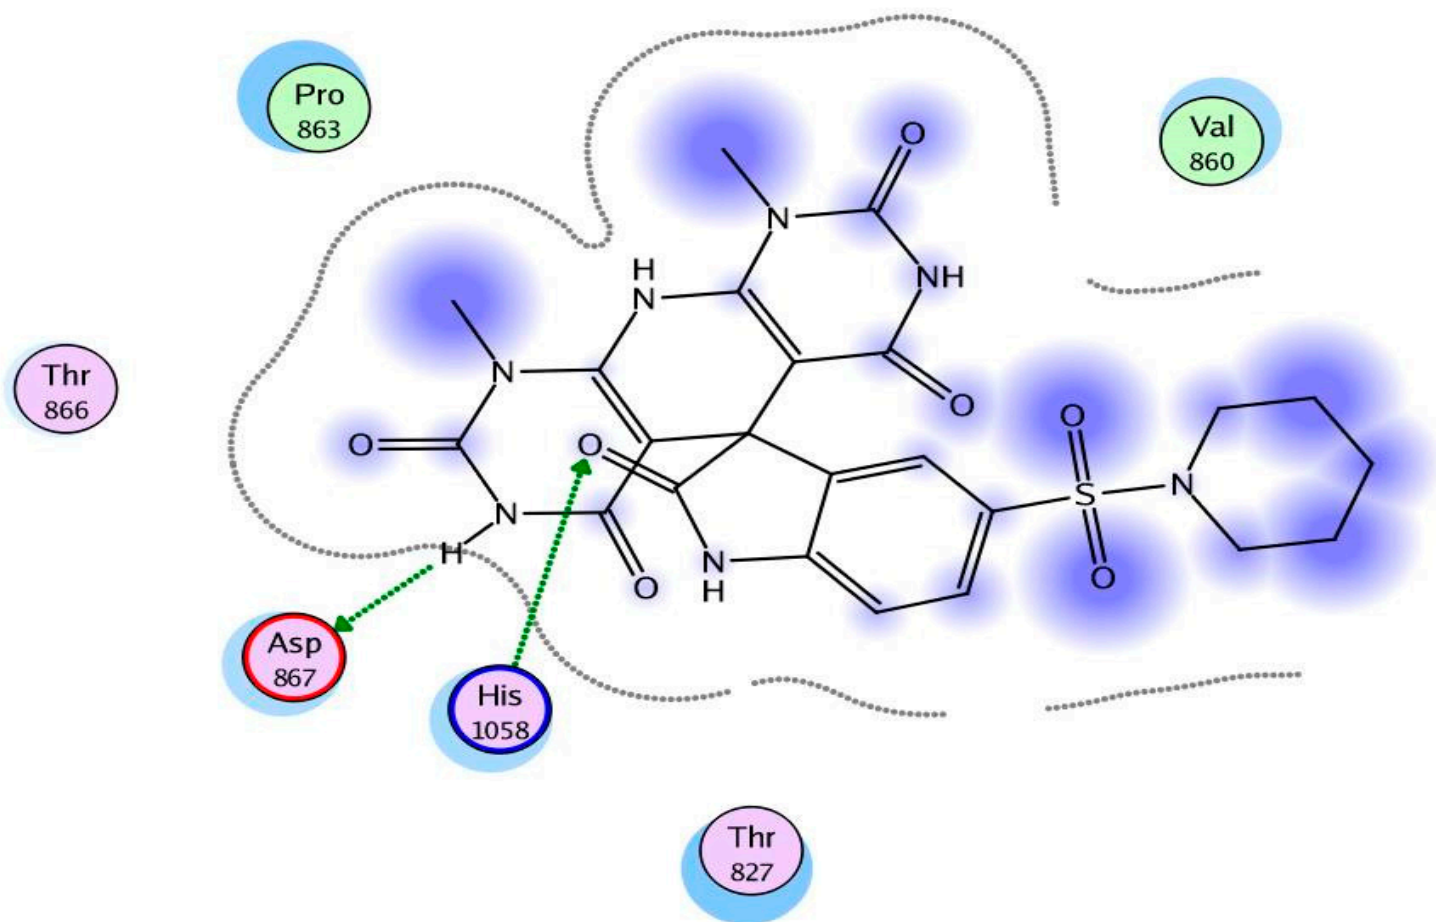

2D structure of compound **4b** inside the active site of spike glycoprotein (SGp) (PDB: 6VXX)

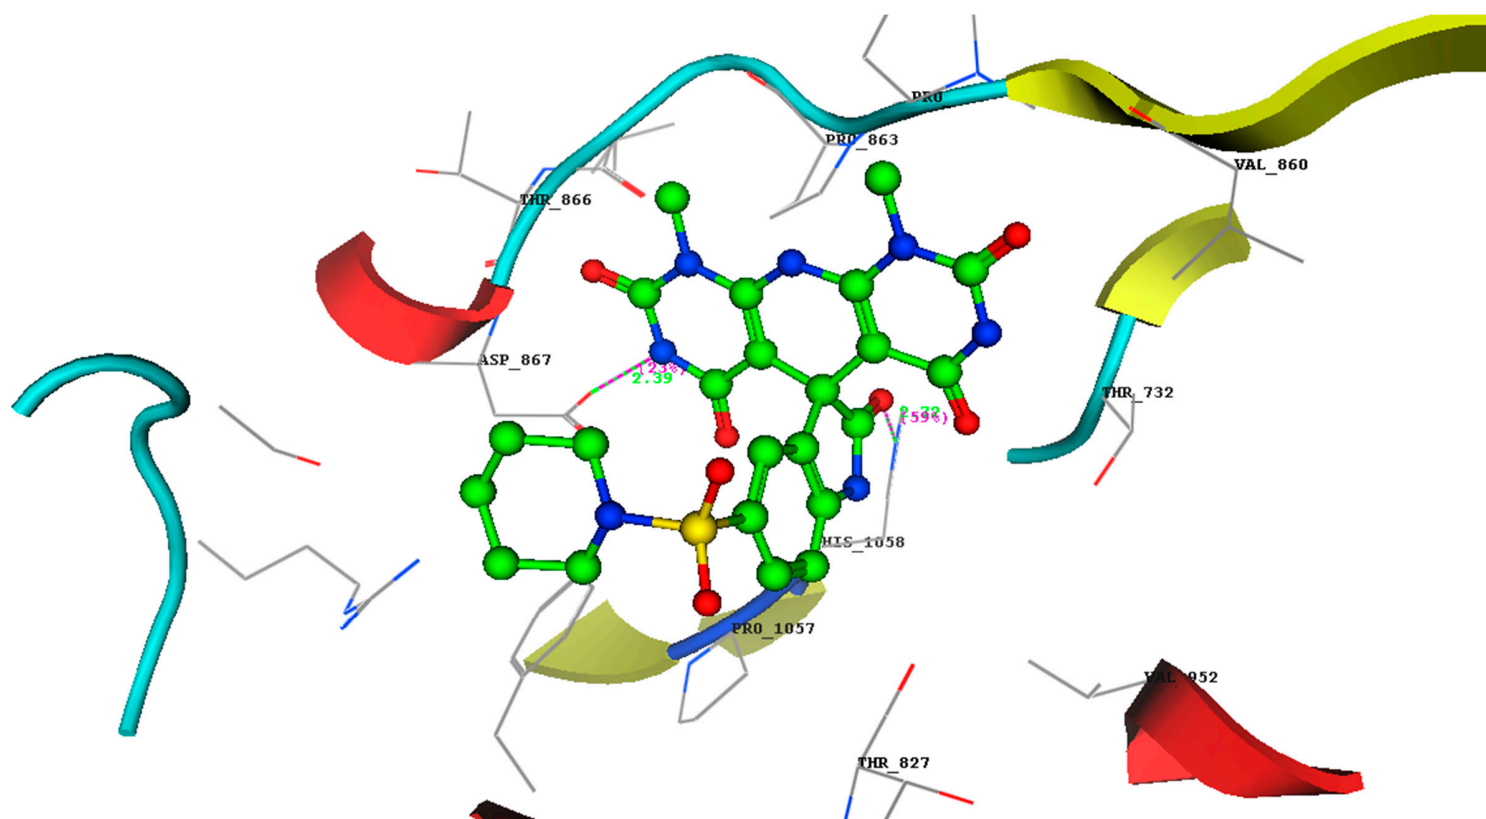

3D structure of compound **4b** inside the active site of spike glycoprotein (SGp) (PDB: 6VXX)

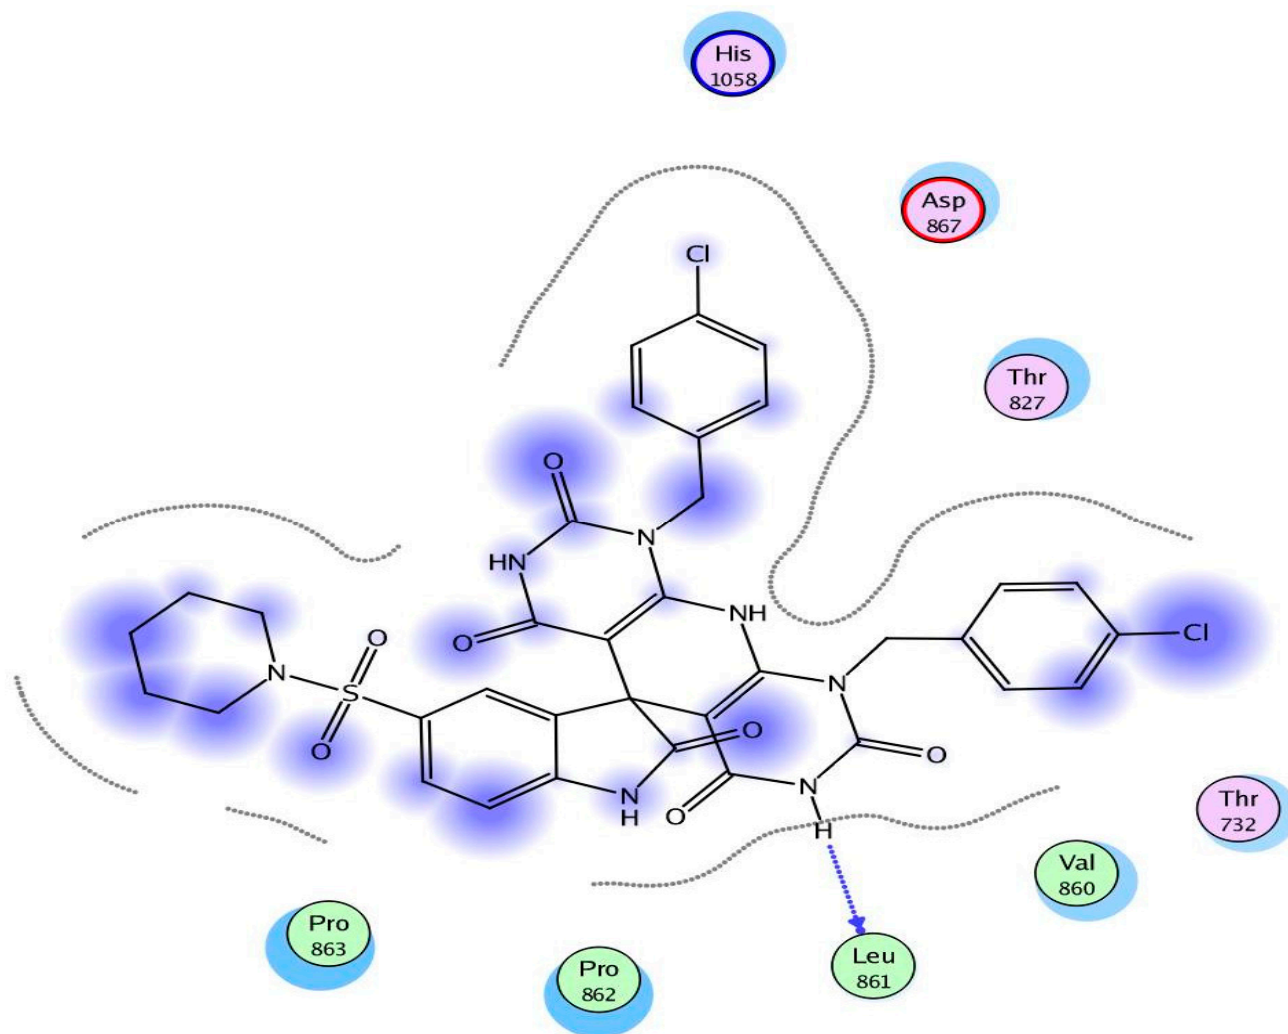

2D structure of compound **4d** inside the active site of spike glycoprotein (SGp) (PDB: 6VXX)

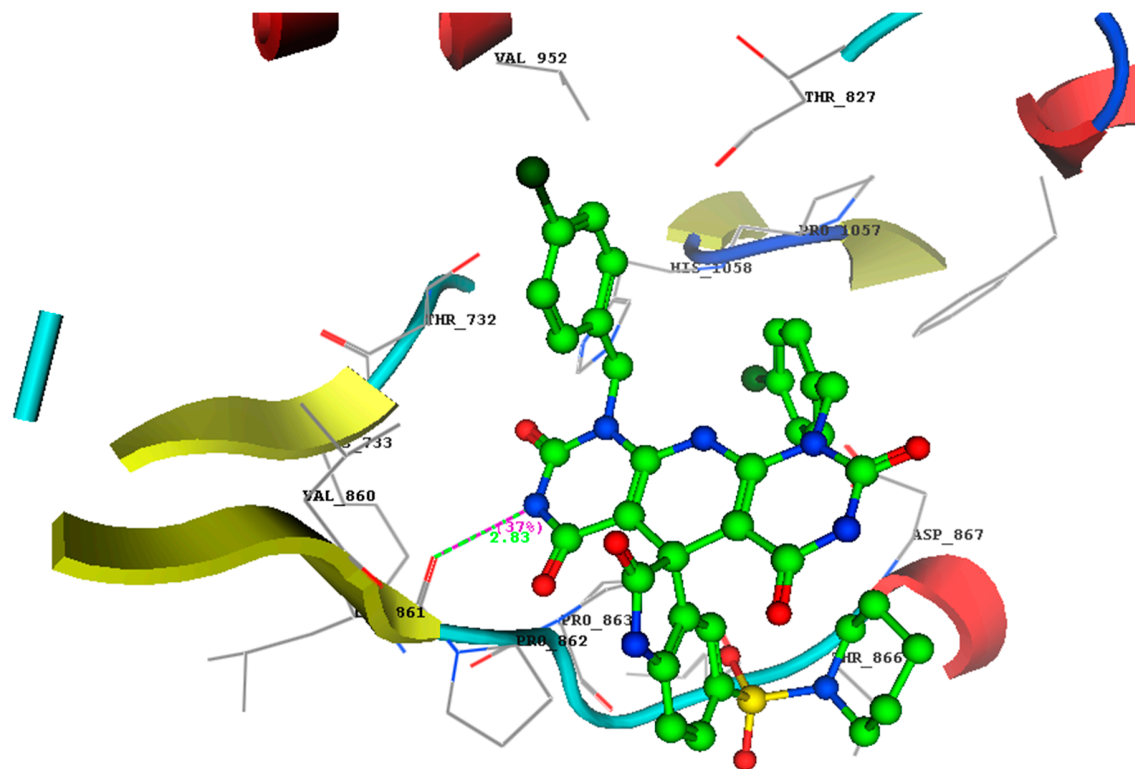

3D structure of compound **4d** inside the active site of spike glycoprotein (SGp) (PDB: 6VXX)

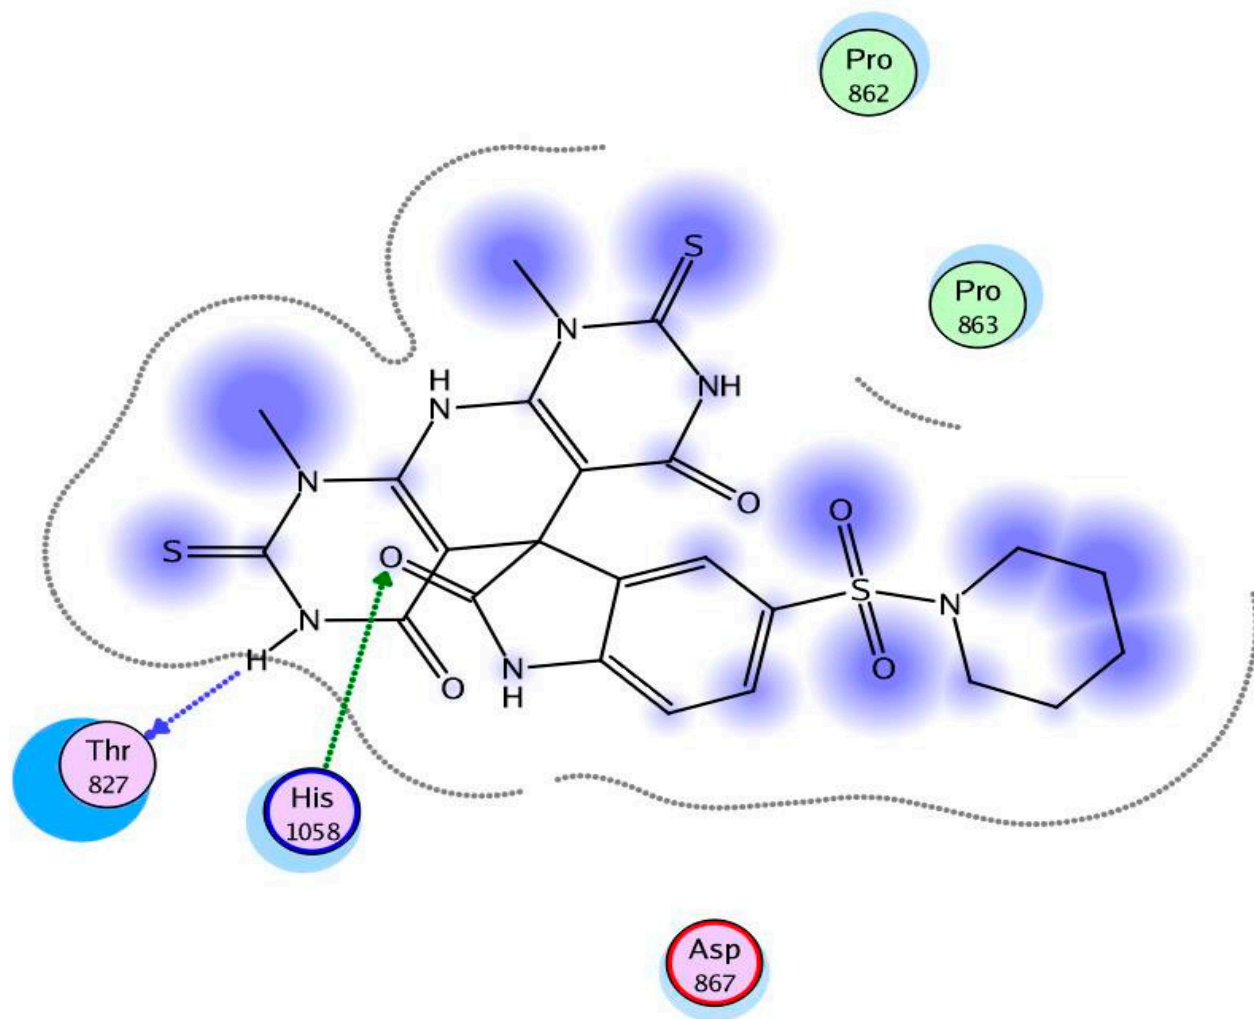

2D structure of compound **4e** inside the active site of spike glycoprotein (SGp) (PDB: 6VXX)



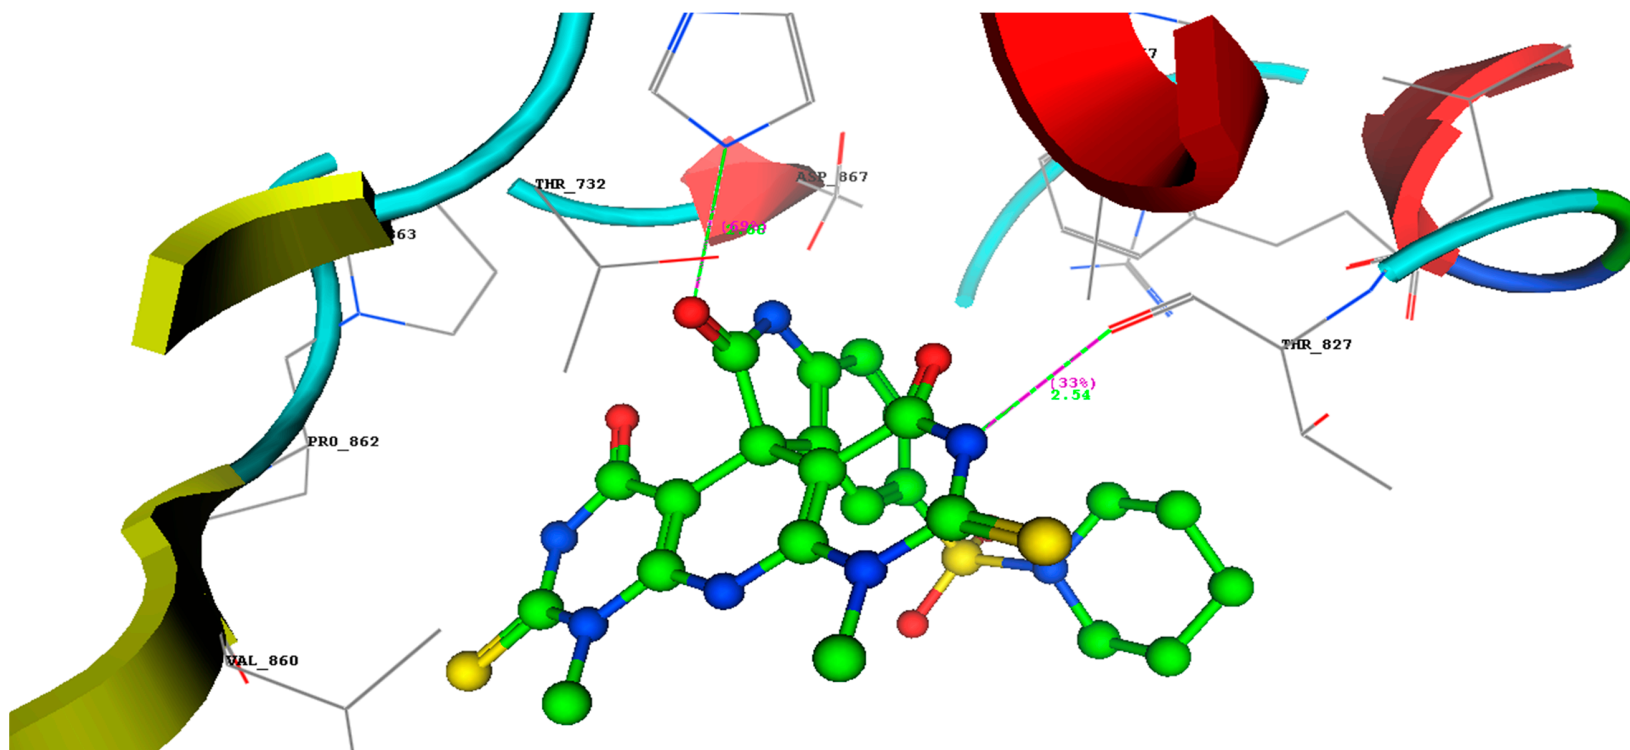

3D structure of compound **4e** inside the active site of spike glycoprotein (SGp) (PDB: 6VXX)

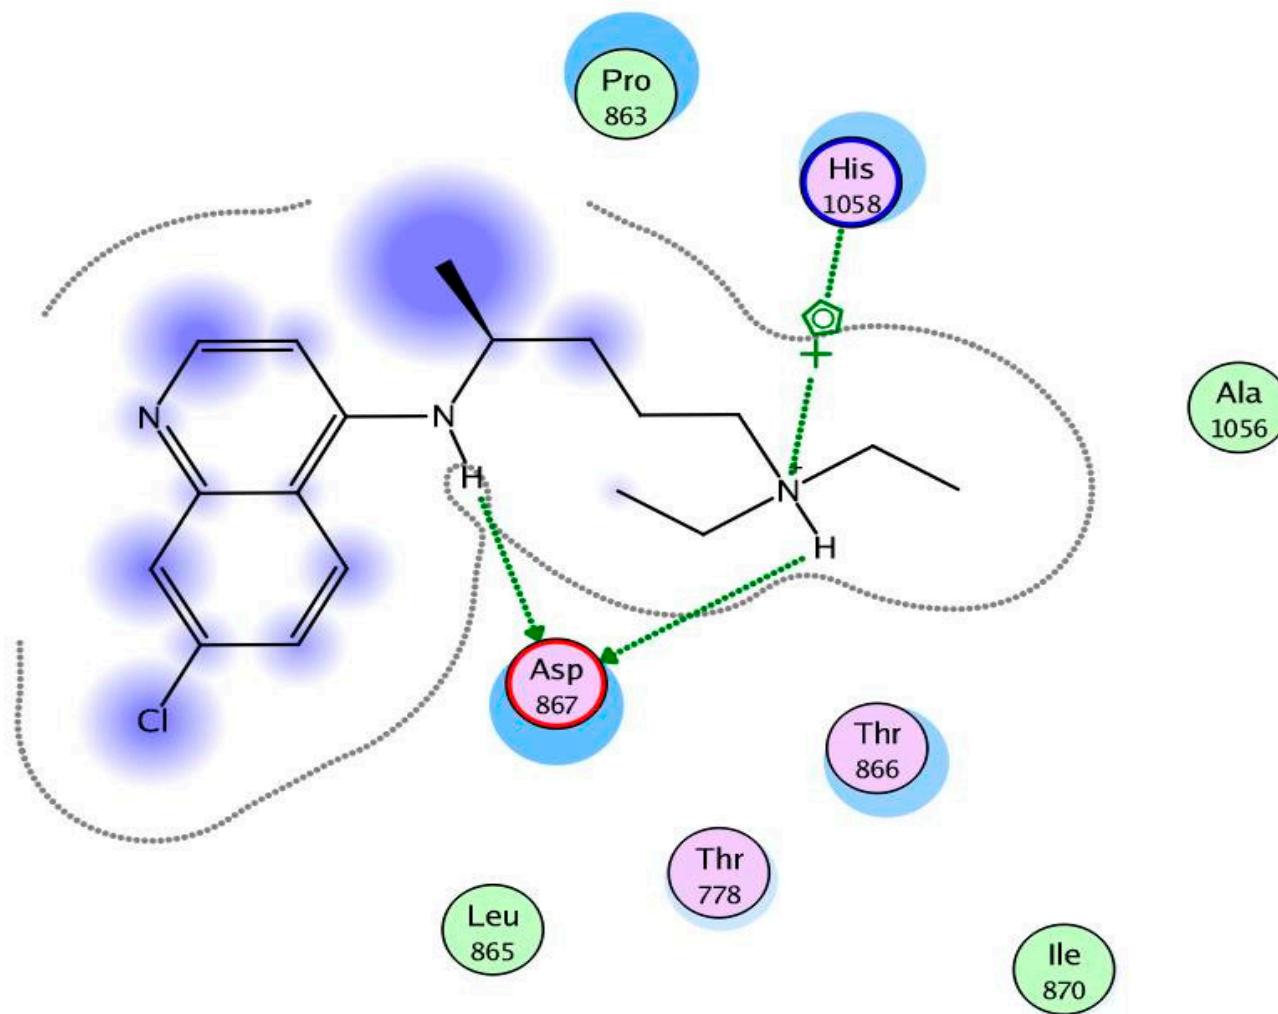

2D structure of **Chloroquine** inside the active site of spike glycoprotein (SGp) (PDB: 6VXX)

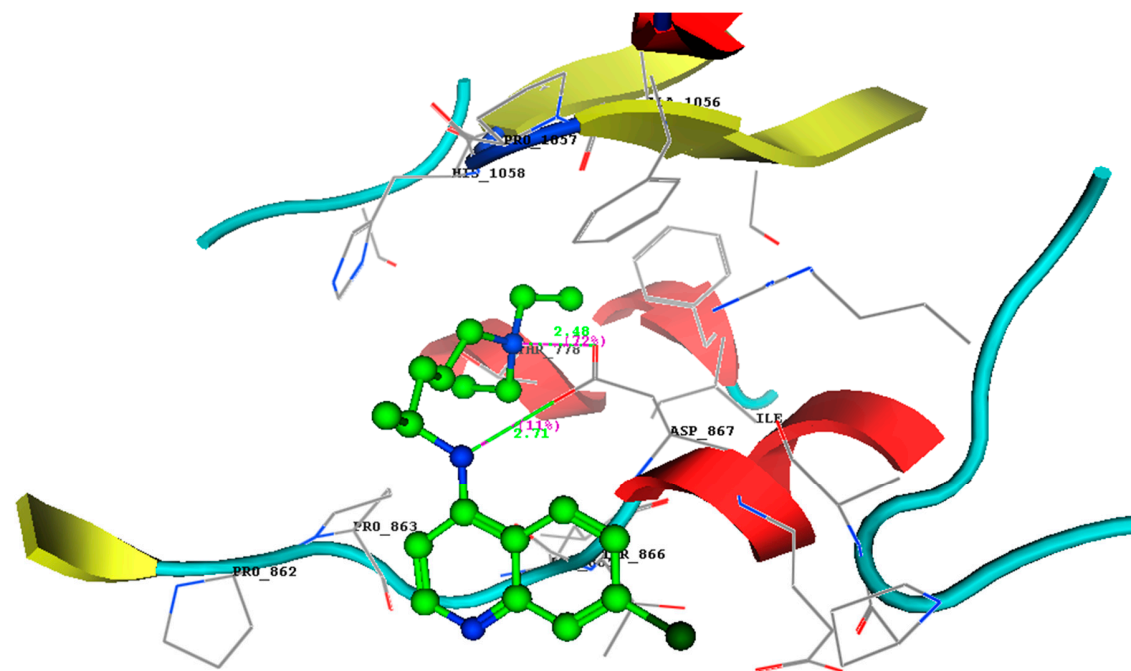

3D structure of **Chloroquine** inside the active site of spike glycoprotein (SGp) (PDB: 6VXX)

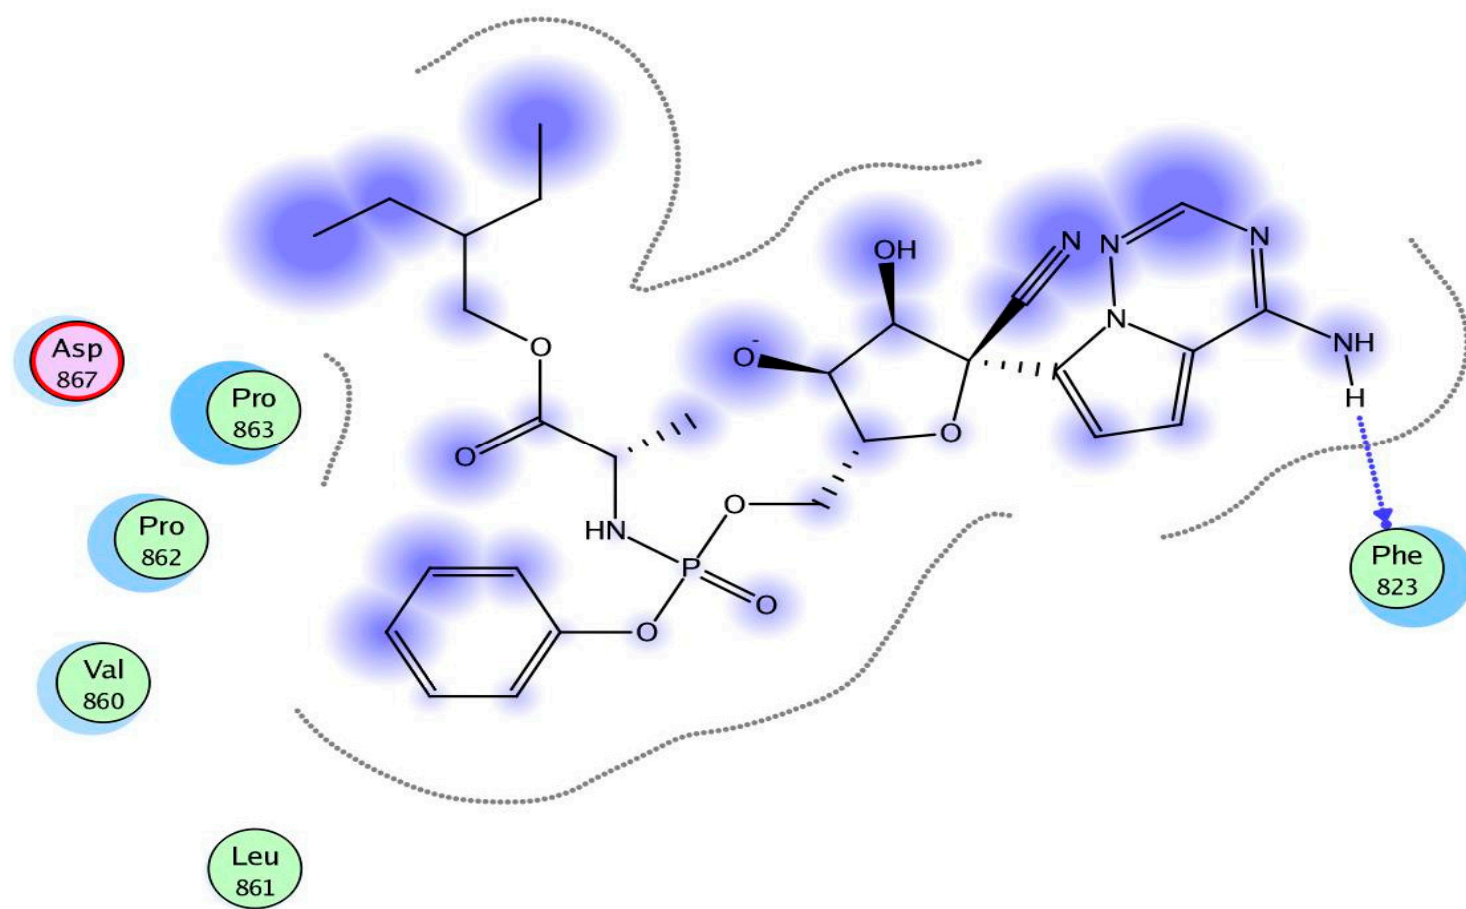

2D structure of **Remdesivir** inside the active site of spike glycoprotein (SGp) (PDB: 6VXX)

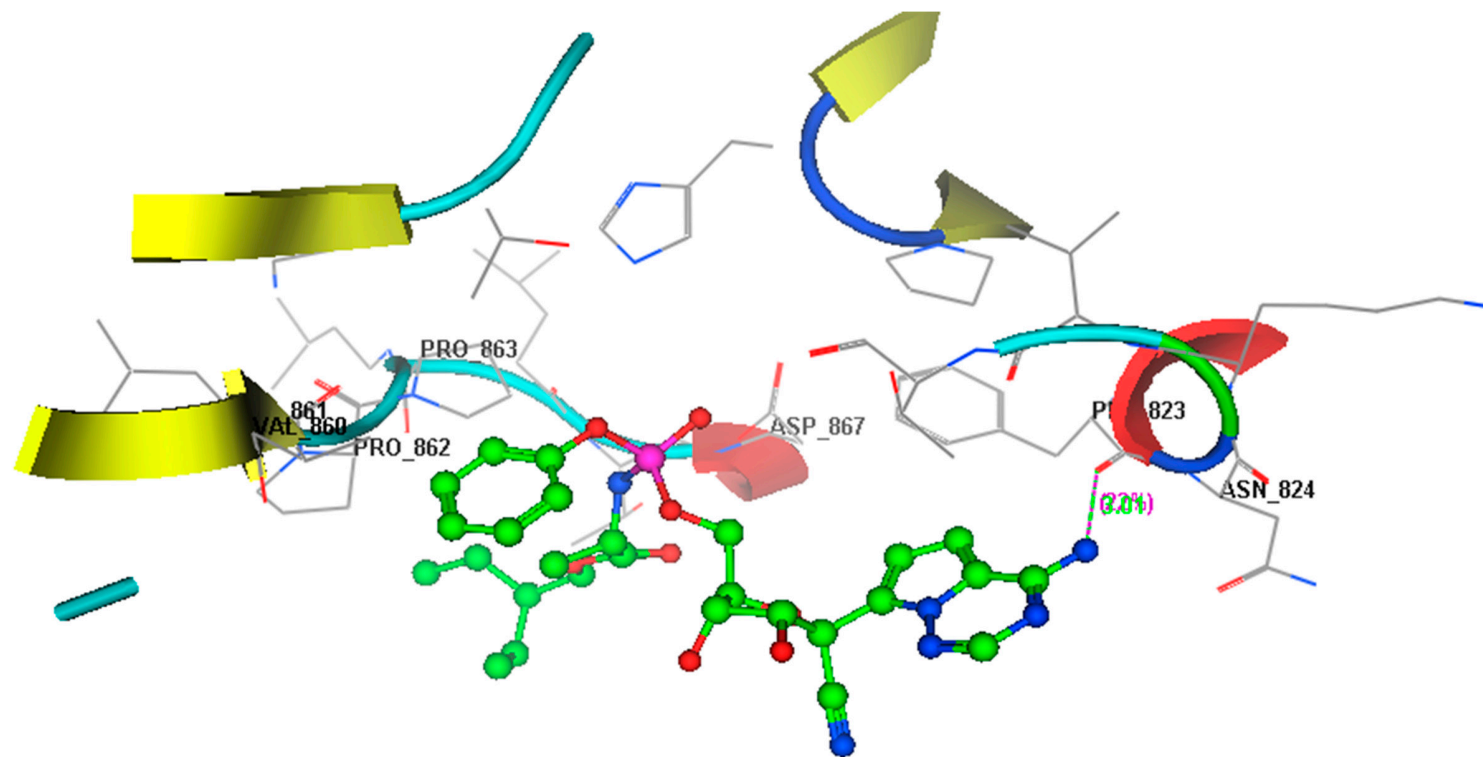

3D structure of **Remdesivir** inside the active site of spike glycoprotein (SGp) (PDB: 6VXX)
